# Supplementary material for: IL-10 attenuates metabolic dysfunction–associated steatotic liver disease via modulation of hepatic responses to lipotoxicity
Source: JCI journal article supplement (doi:10.1172/jci.insight.200231), 2026-04-23
Supplement: sd1 [file 1]

**Fig. 1G (IL-10R $\alpha$  Full unedited blot)**

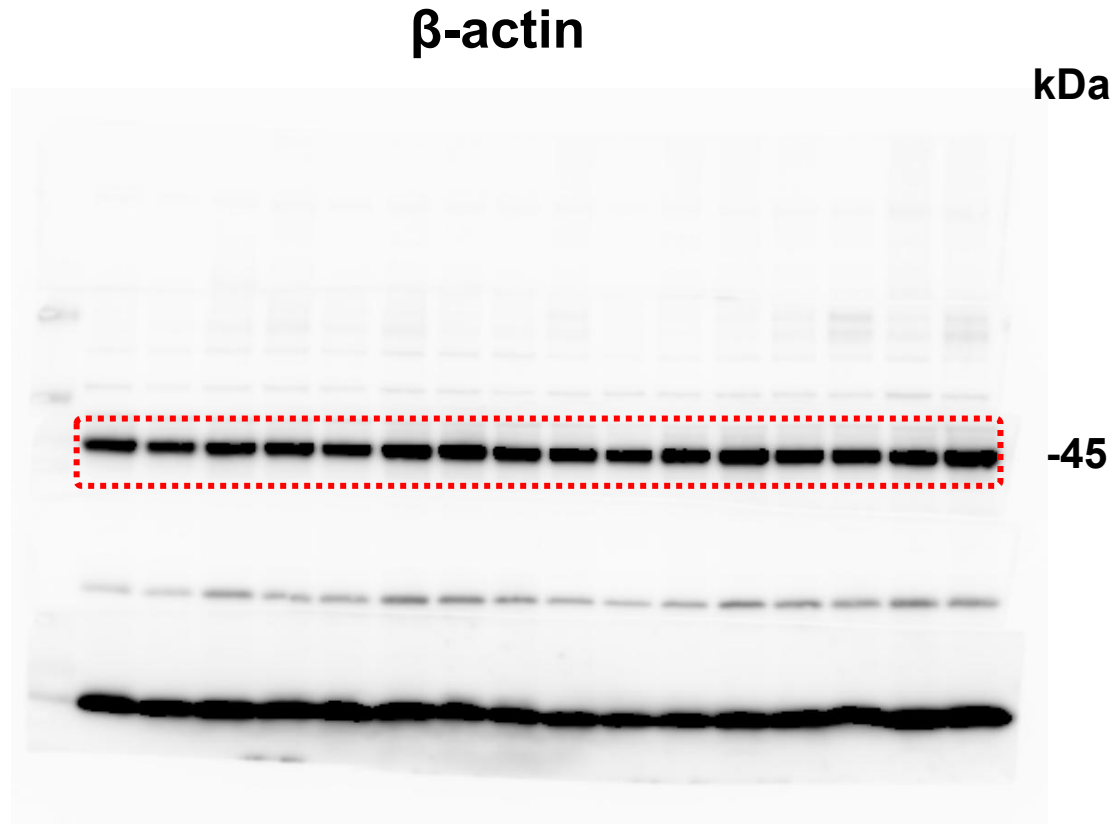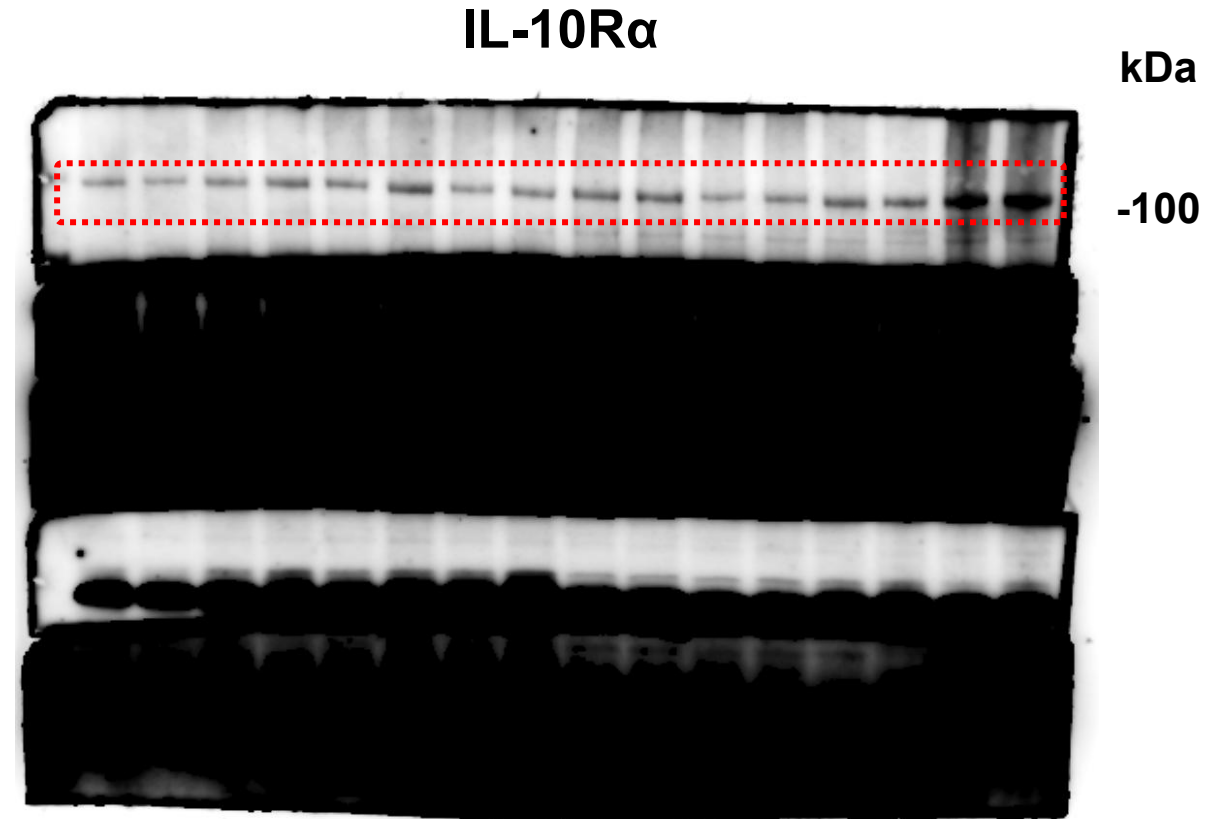

**Note: 1. The same blot and different exposure times (short and long exposures shown) were used.  
2. Bands used in Figures are indicated by boxes in red outlines.**

**Fig. 1H (FAS-Full unedited blot)**

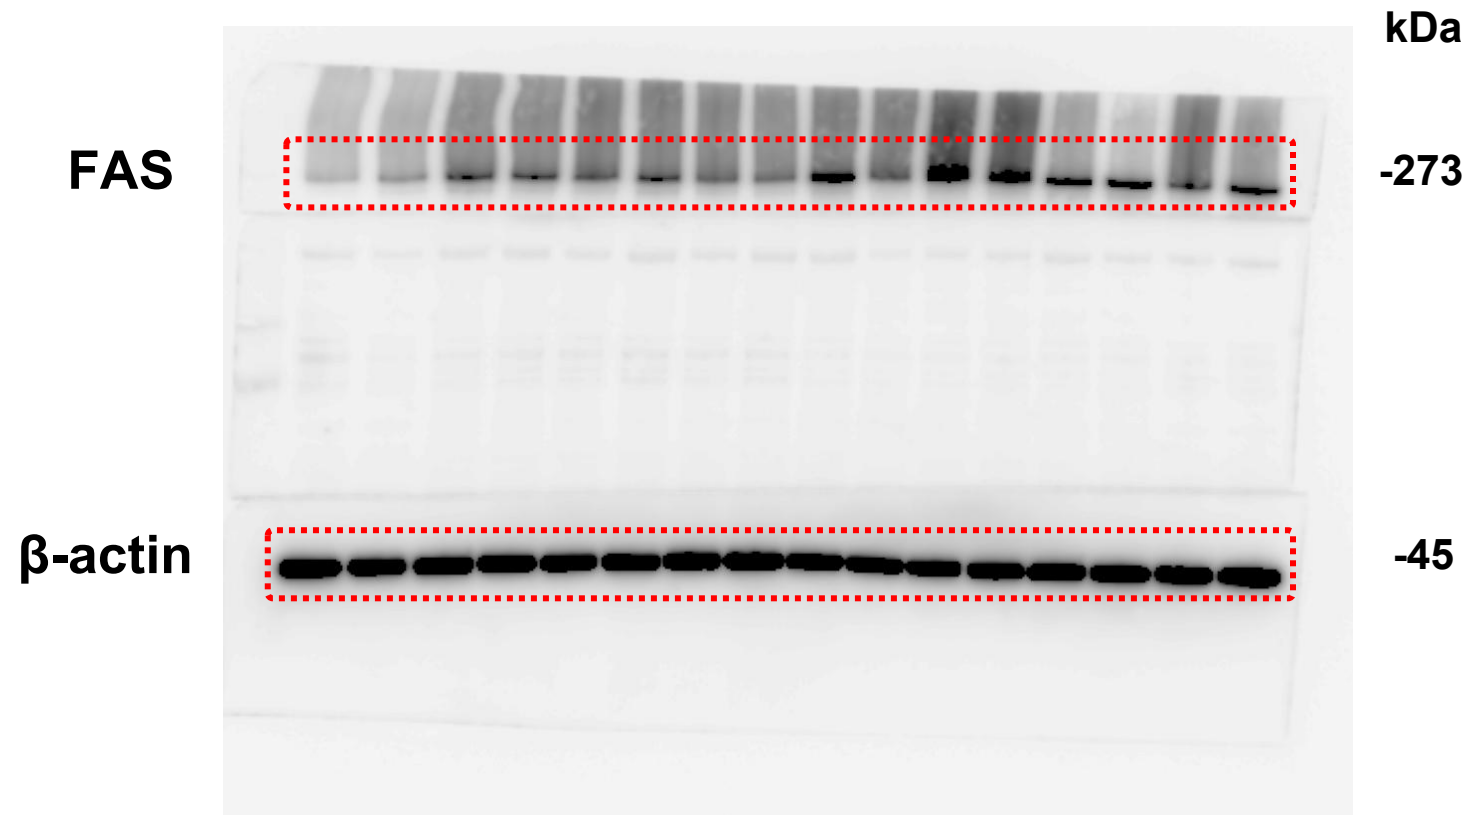

**Note: 1. The same blot was used.**

**2. Bands used in Figures are indicated by boxes in red outlines.**

**Fig. 1H (CPT1-Full unedited blot)**

**$\beta$ -actin**

kDa

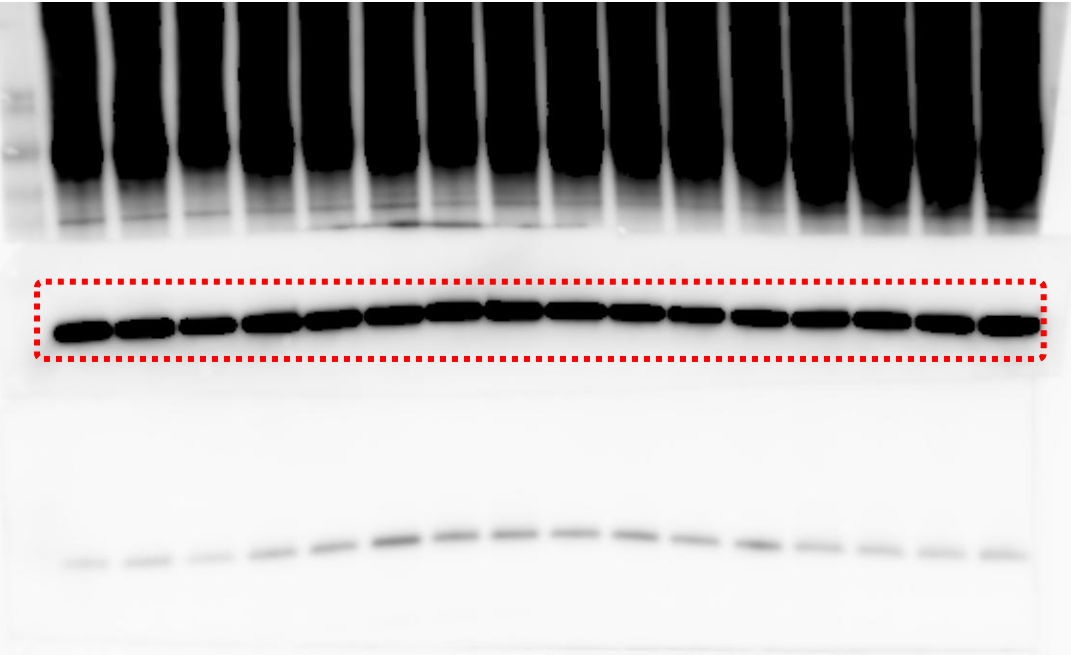

-45

**CPT1**

kDa

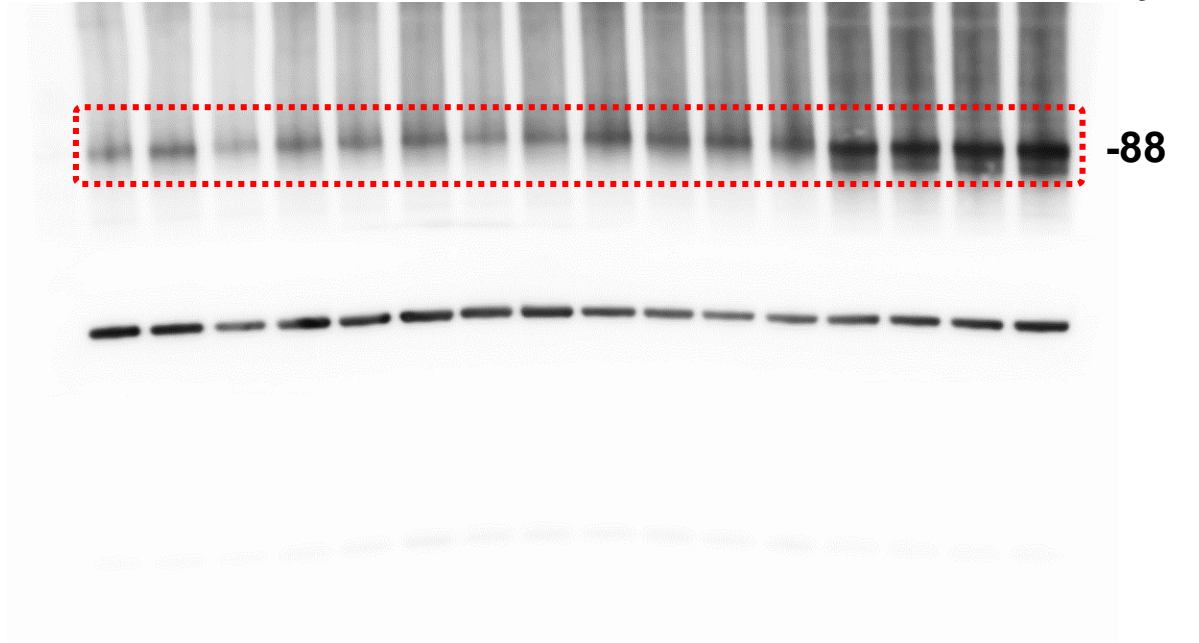

-88

**Note: 1. The same blot and different exposure times (short and long exposures shown) were used.  
2. Bands used in Figures are indicated by boxes in red outlines.**

**Fig. 1H (CPT2-Full unedited blot)**

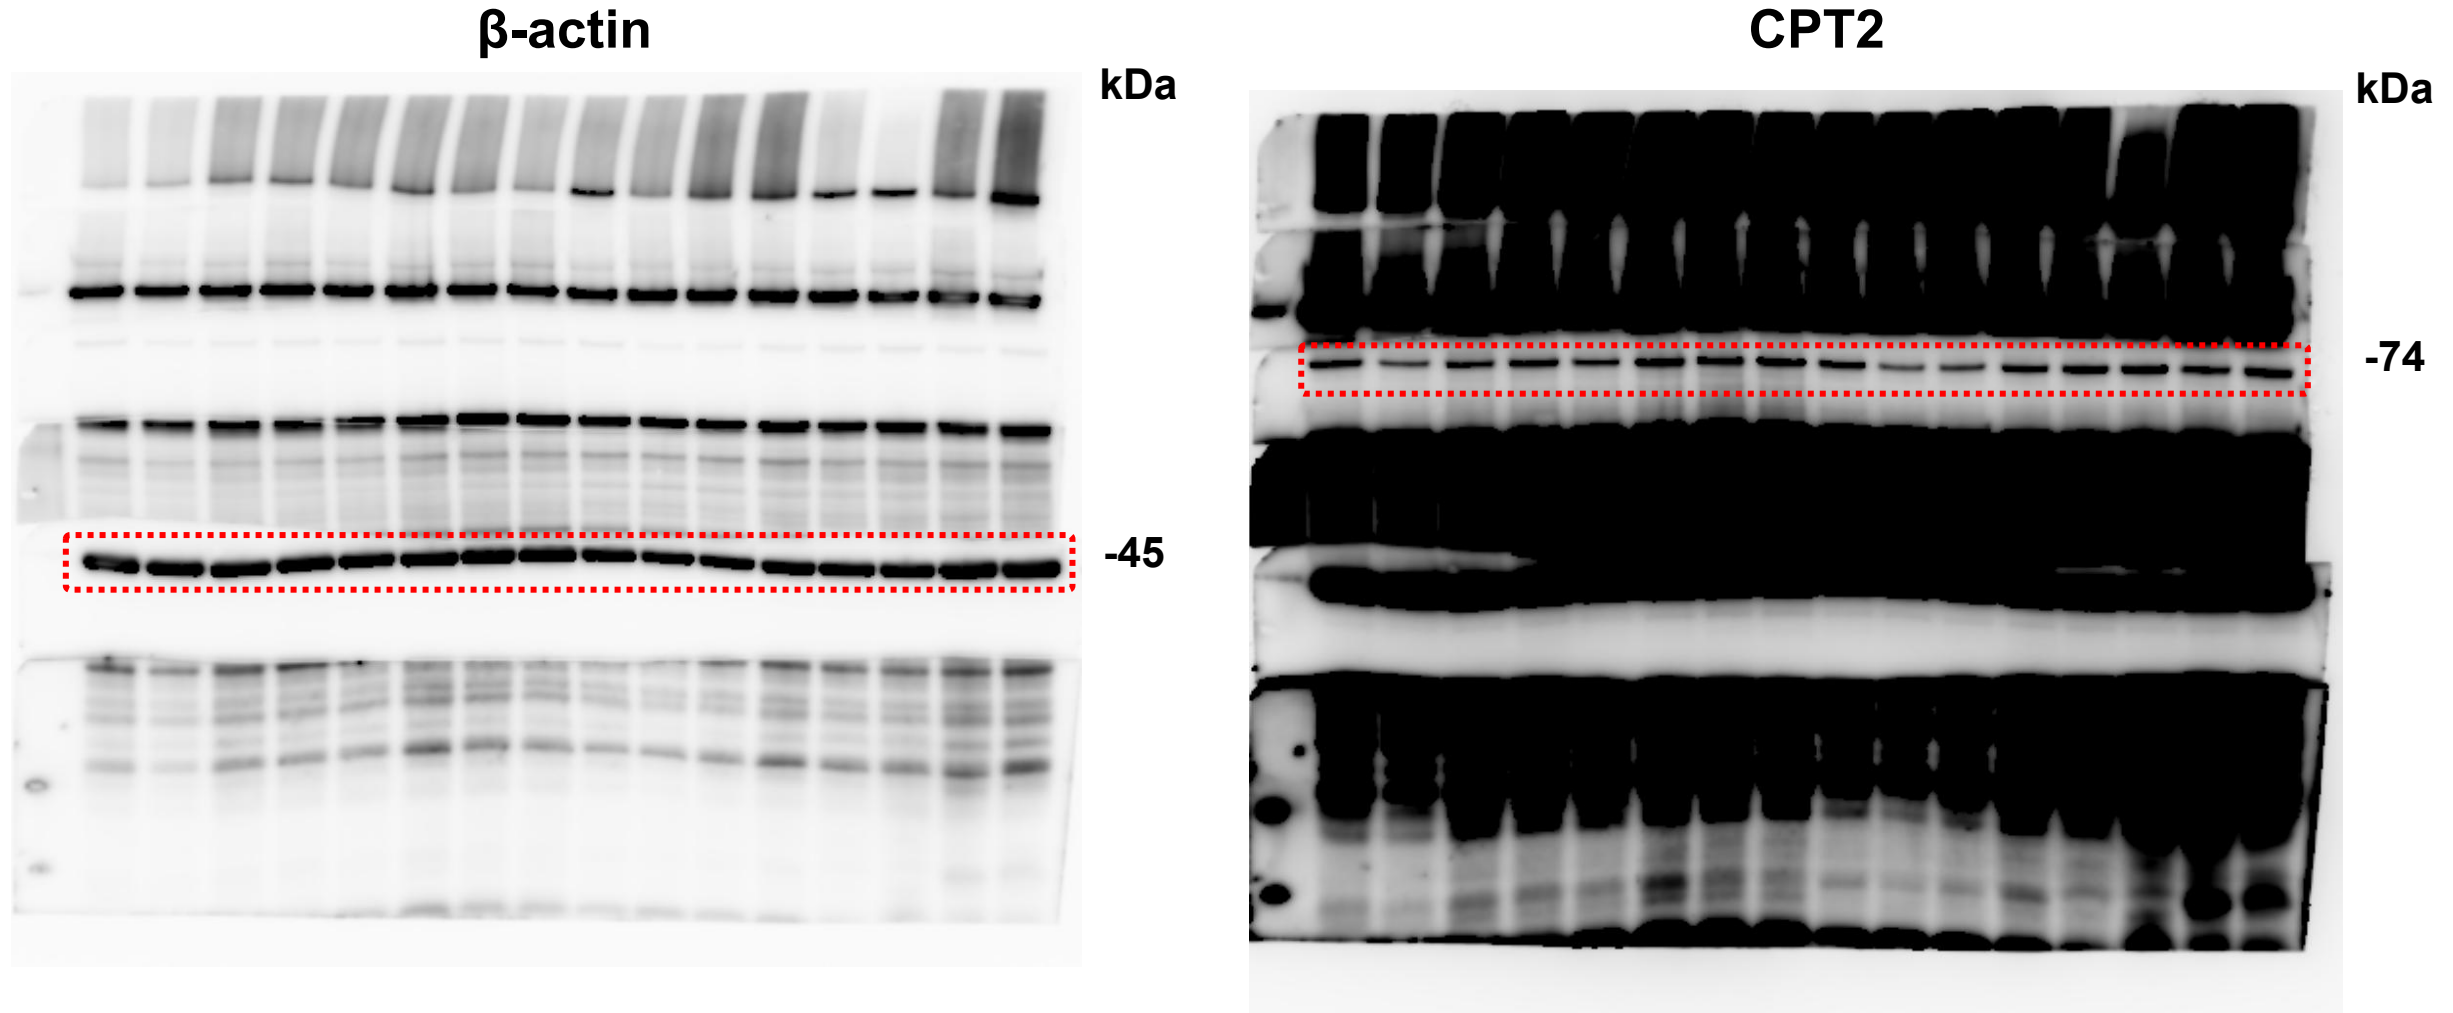

**Note: 1. The same blot and different exposure times (short and long exposures shown) were used.  
2. Bands used in Figures are indicated by boxes in red outlines.**

**Fig. 1H (PPAR $\alpha$ -Full unedited blot)**

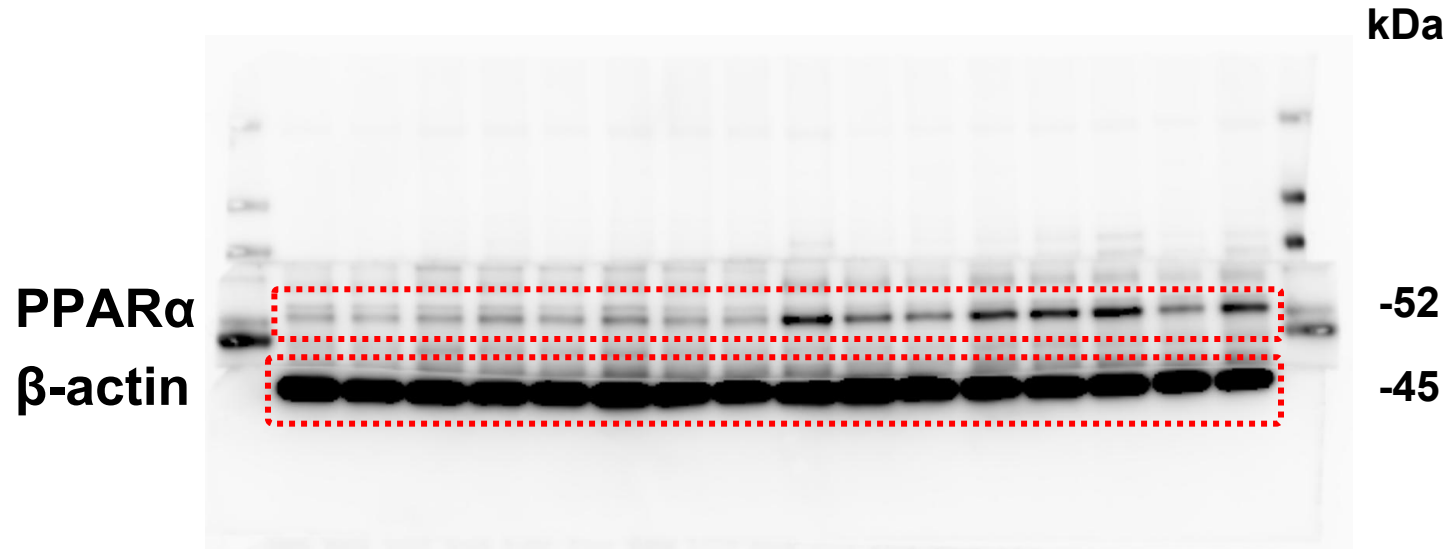

**Note: 1. The same blot was used.**

**2. Bands used in Figures are indicated by boxes in red outlines.**

**Fig. 2C (FAS-Full unedited blot)**

$\beta$ -actin

kDa

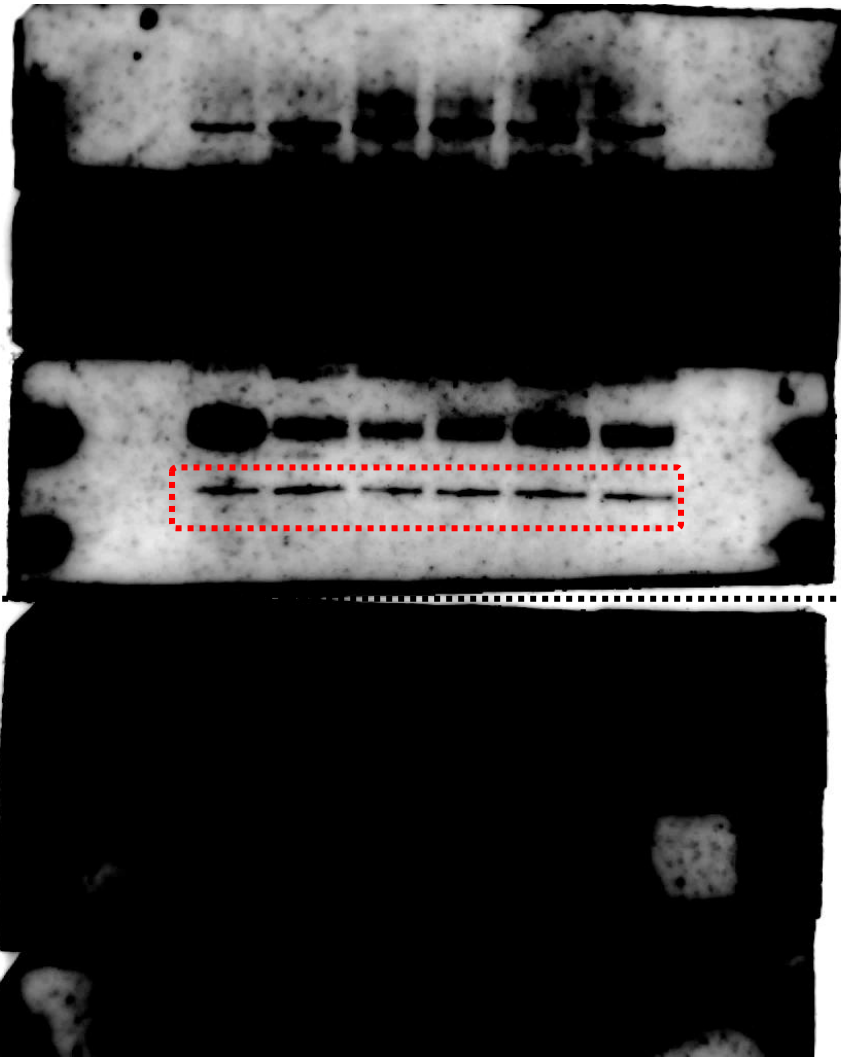

FAS

kDa

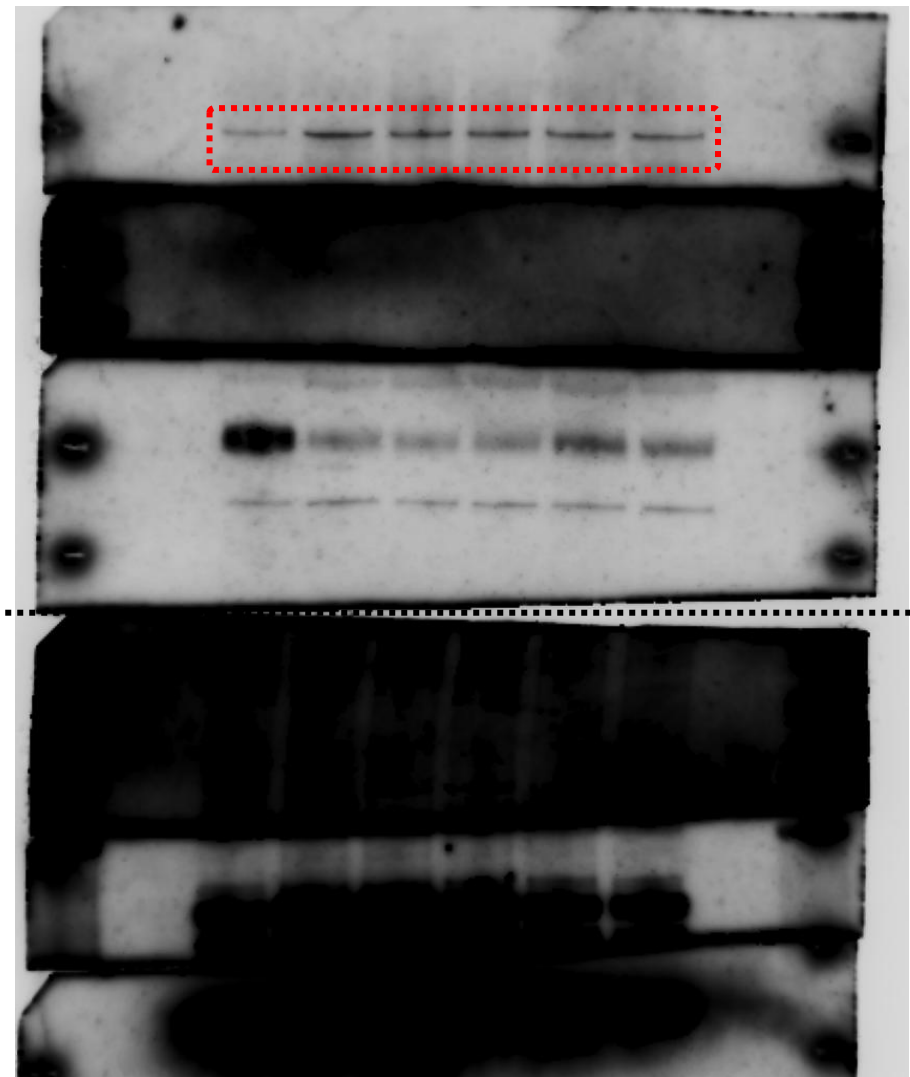

**Note: 1. The same blot and different exposure times (short and long exposures shown) were used.  
2. Bands used in Figures are indicated by boxes in red outlines.**

**Fig. 2C (CPT1-Full unedited blot)**

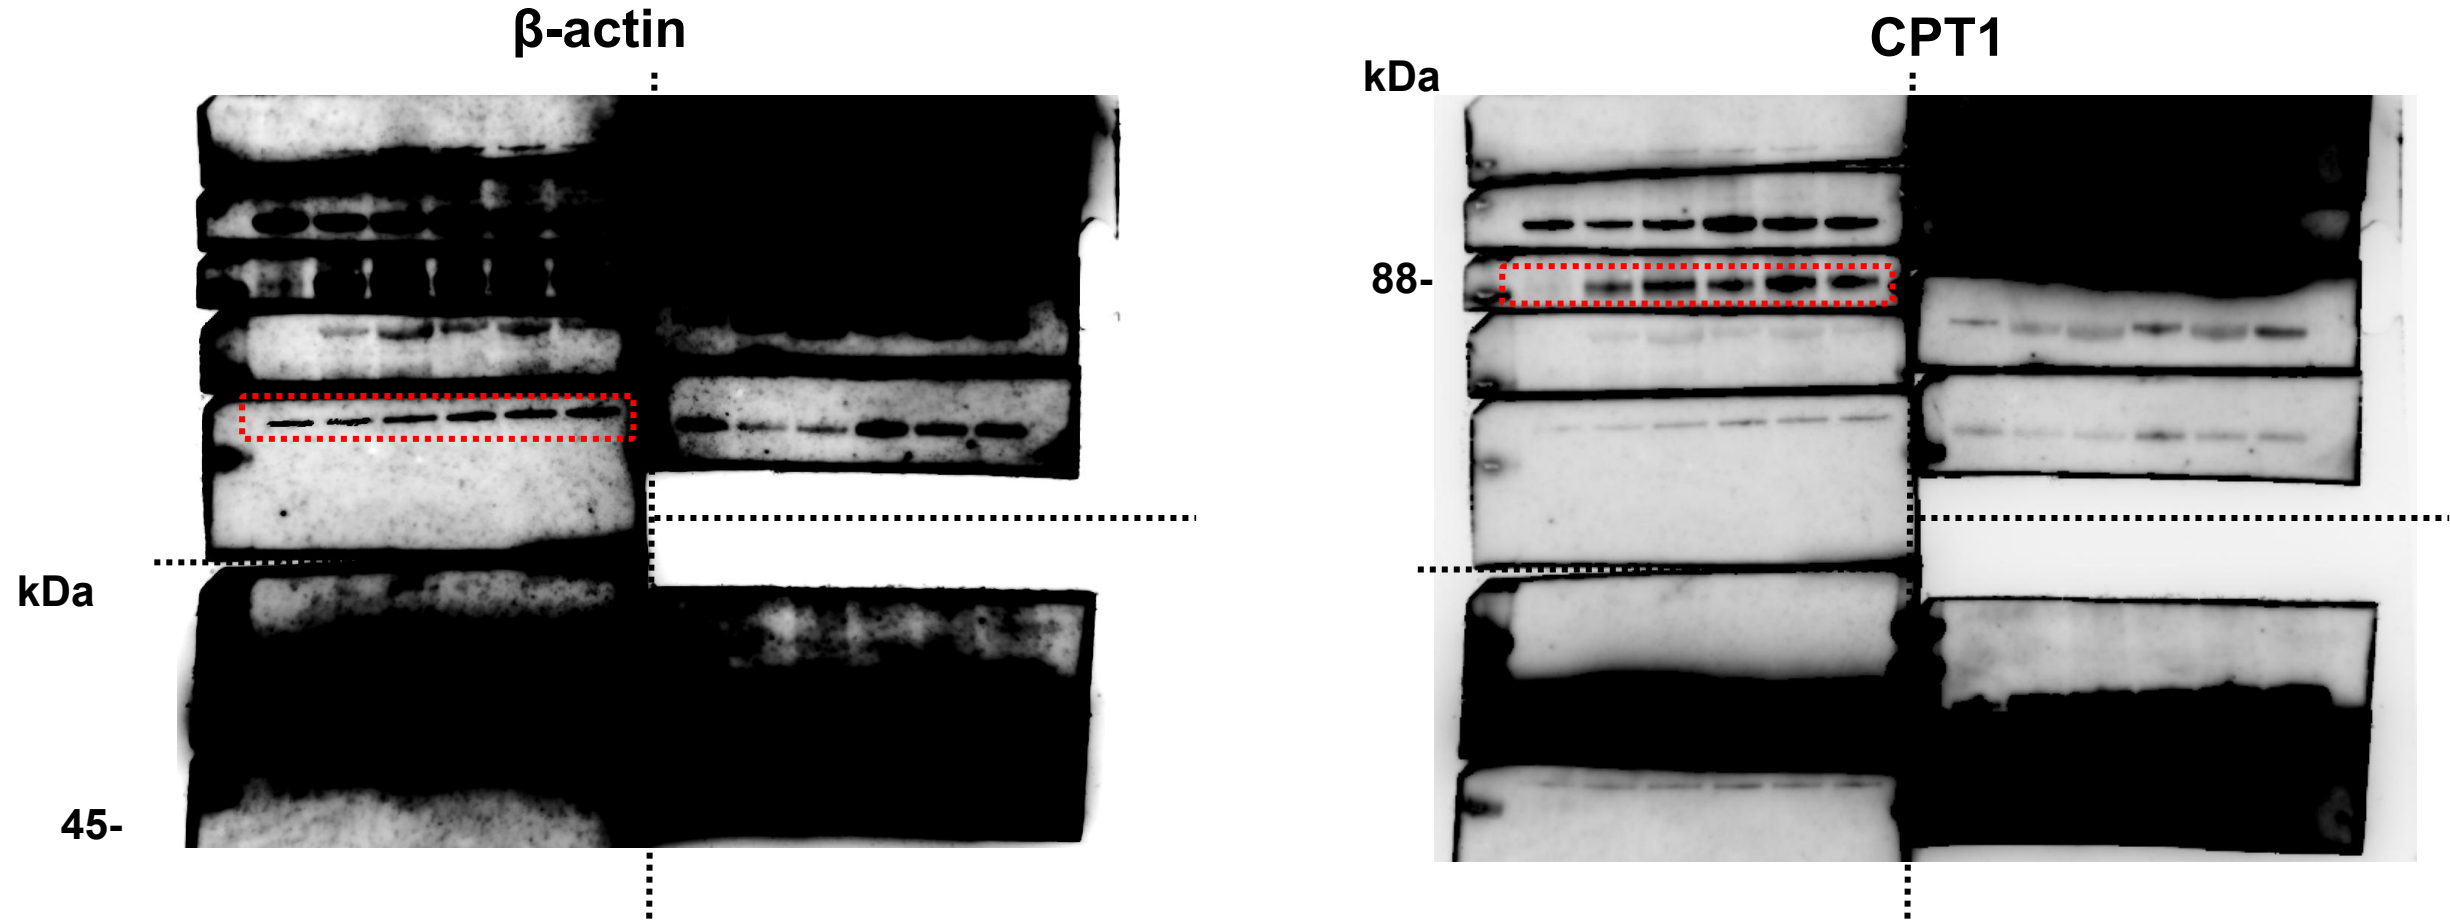

**Note: 1. The same blot and different exposure times (short and long exposures shown) were used.  
2. Bands used in Figures are indicated by boxes in red outlines.**

**Fig. 2C (CPT2-Full unedited blot)**

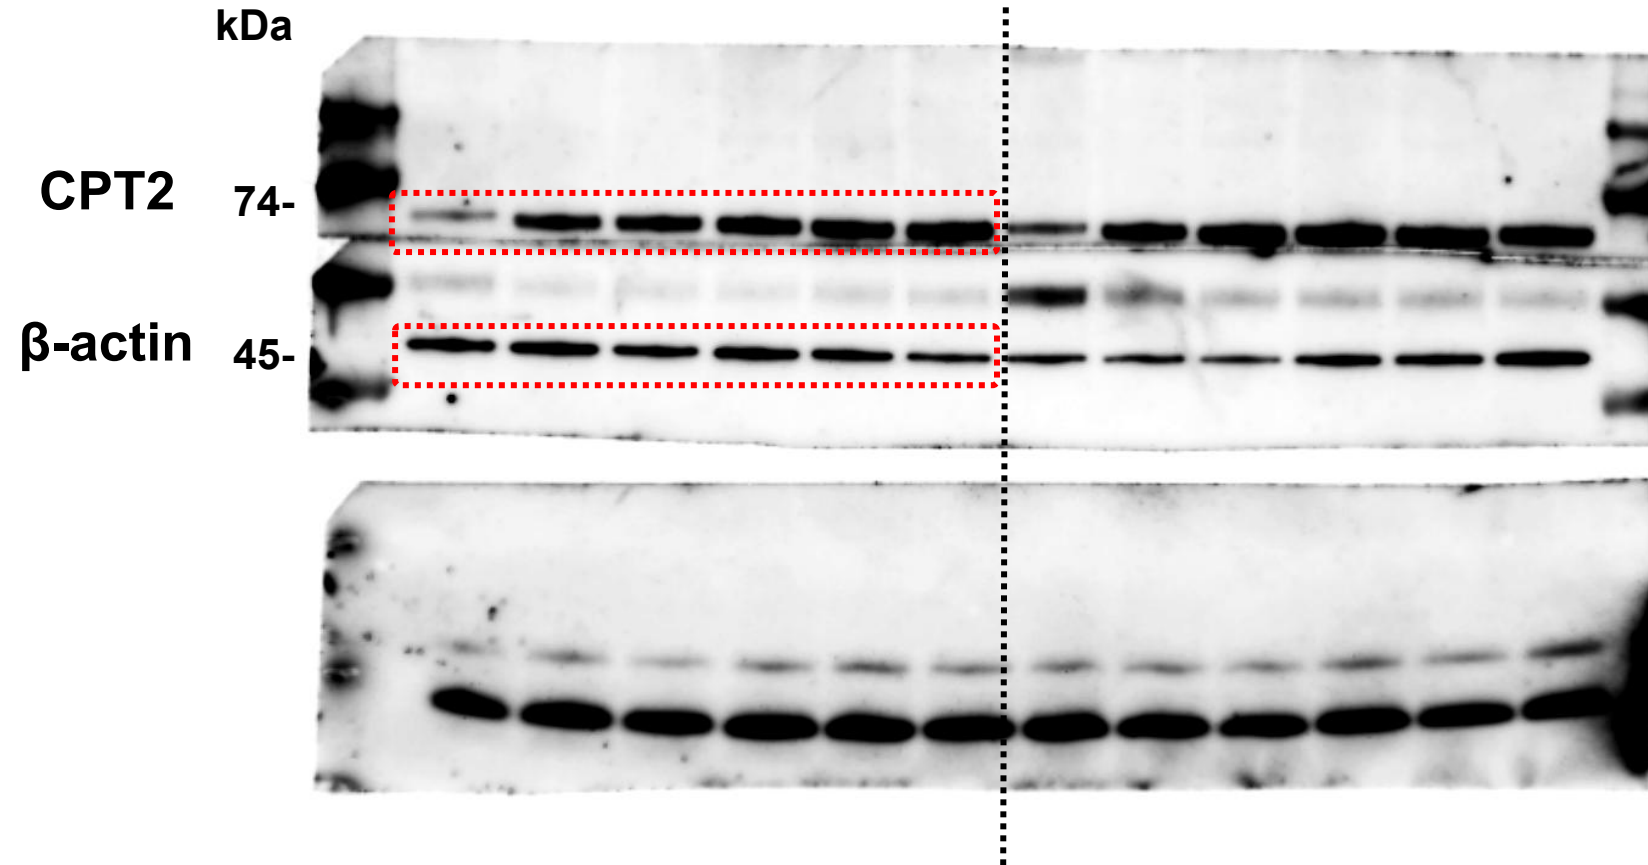

**Note: 1. The same blot was used.  
2. Bands used in Figures are indicated by boxes in red outlines.**

**Fig. 2C (PPAR $\alpha$ -Full unedited blot)**

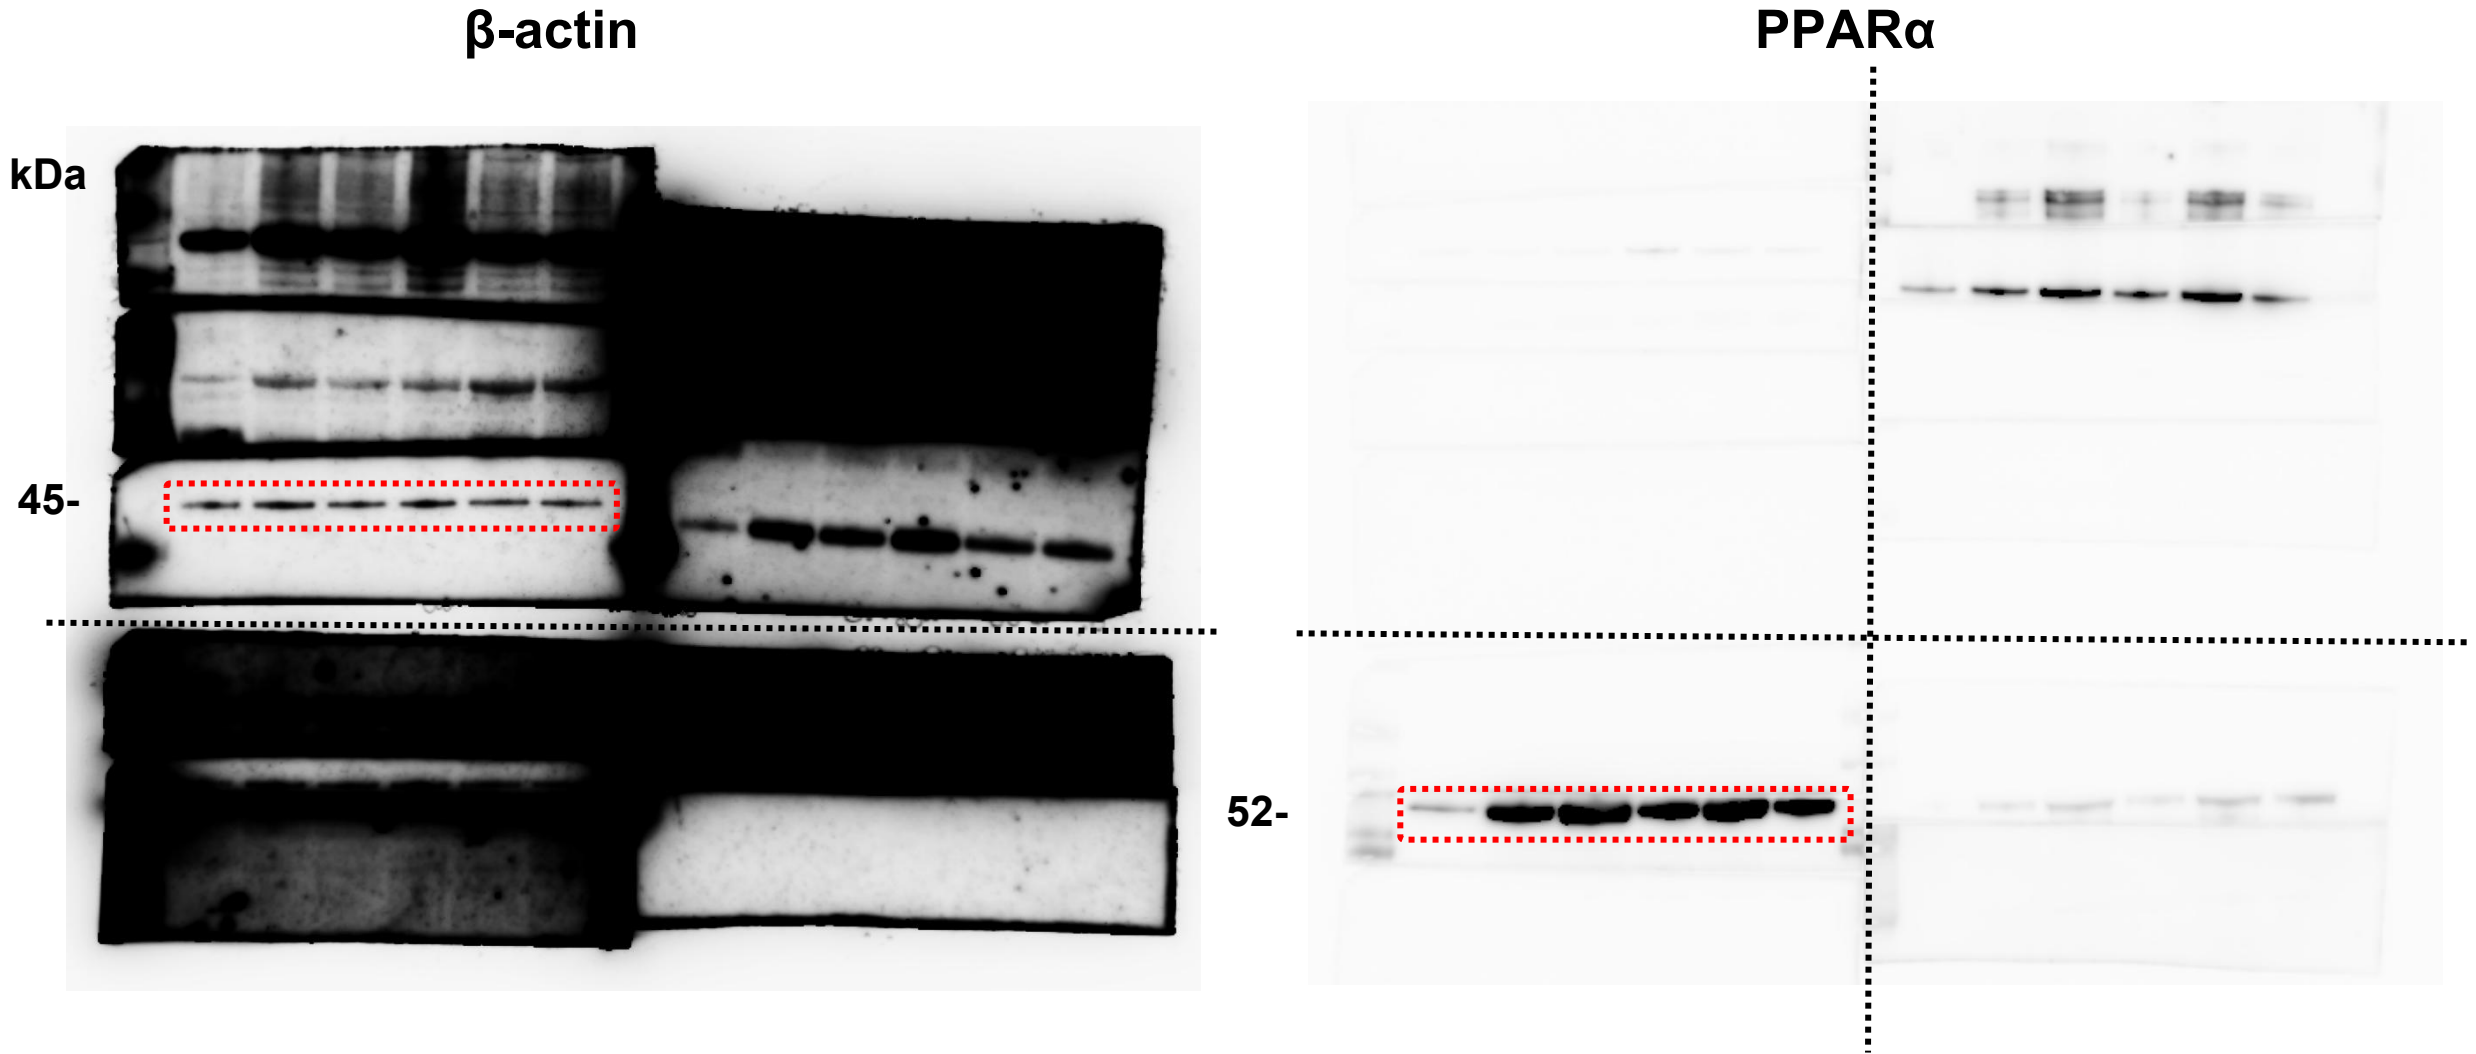

**Note: 1. Separate, noncontiguous lanes from the same samples were used for each antibody.  
2. Bands used in Figures are indicated by boxes in red outlines.**

**Fig. 4D (GLUT2-Full unedited blot)**

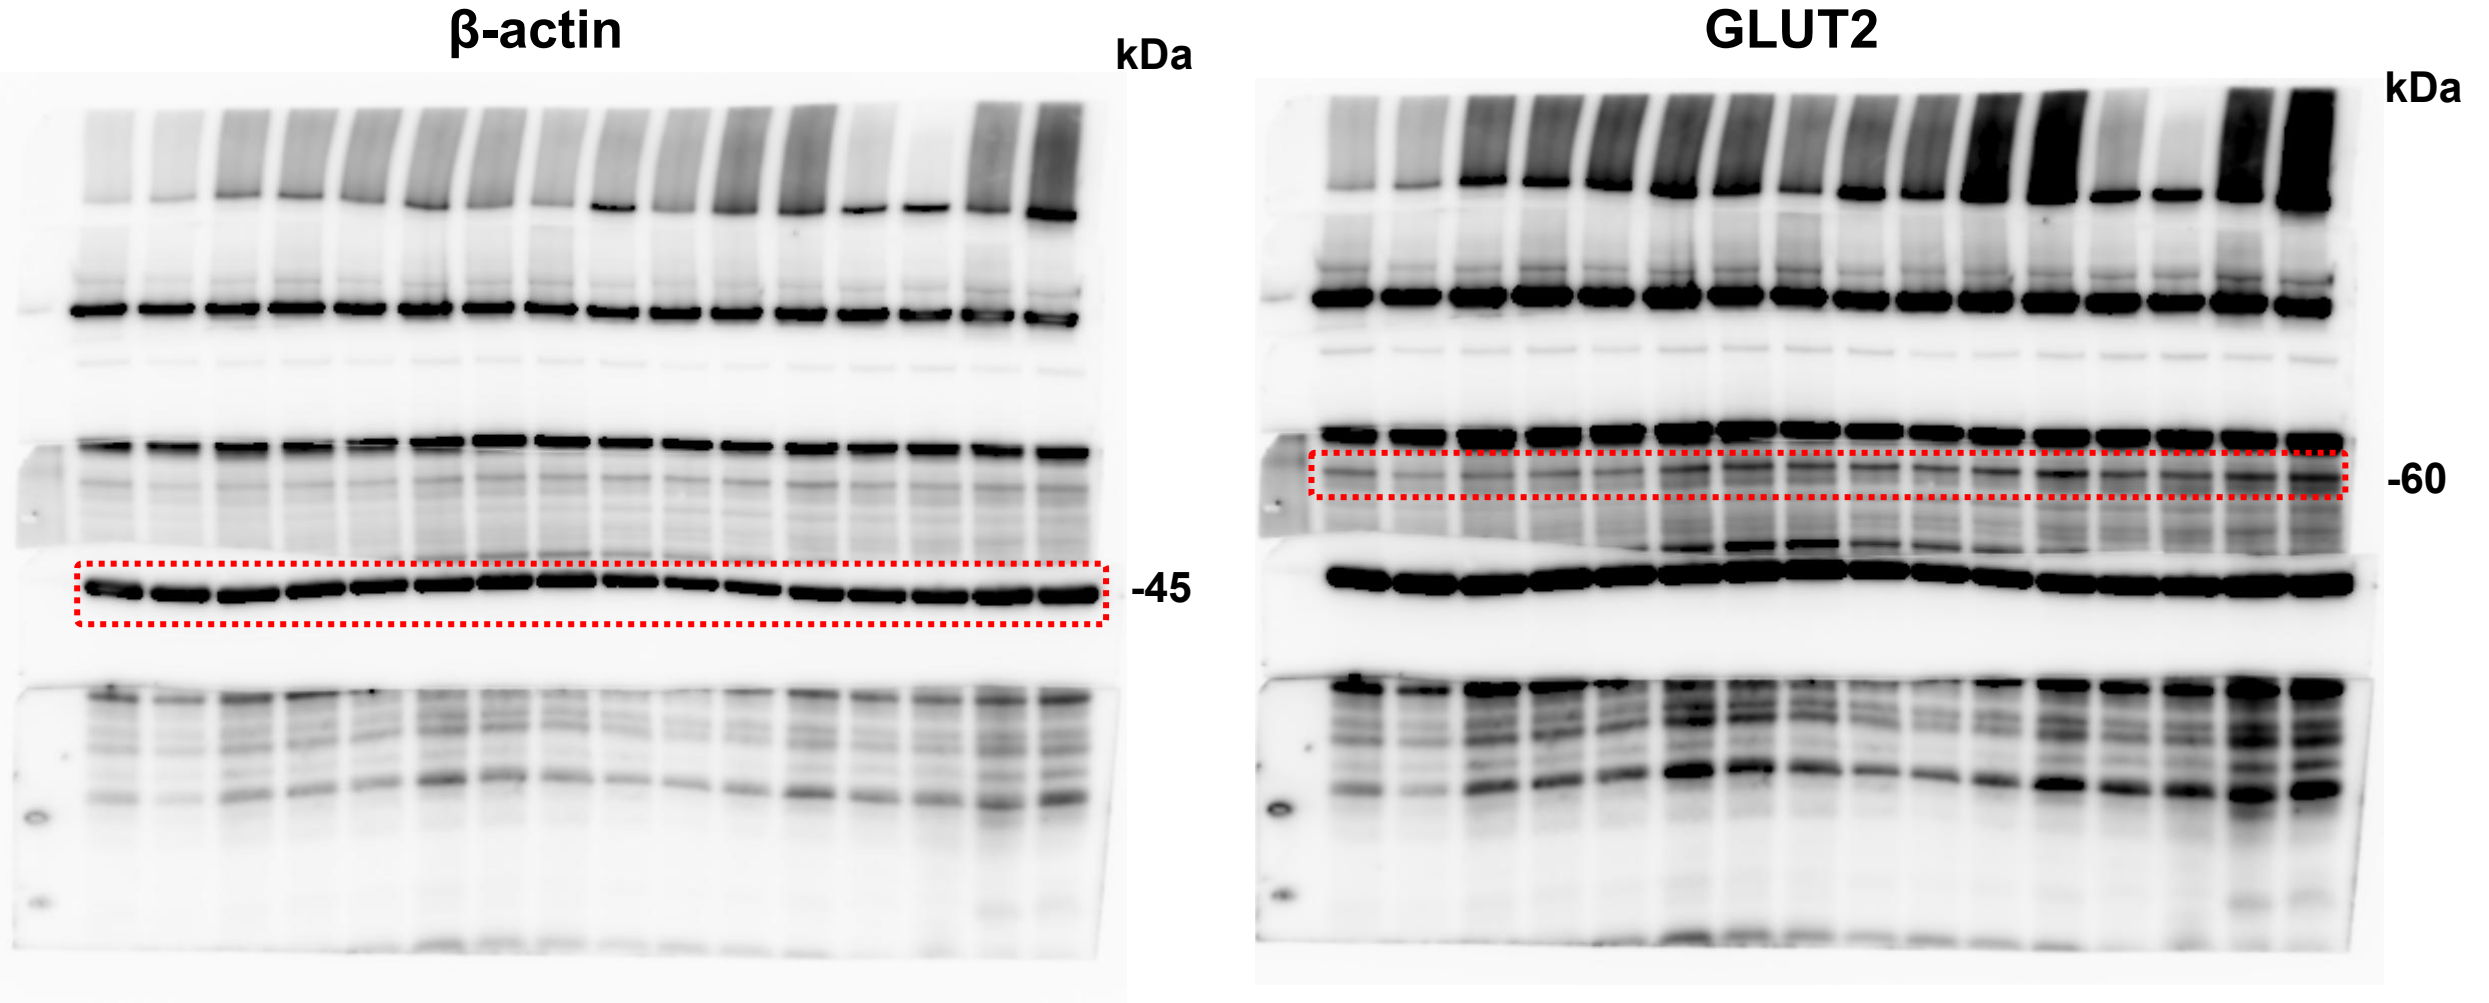

**Note: 1. The same blot and different exposure times (short and long exposures shown) were used.  
2. Bands used in Figures are indicated by boxes in red outlines.**

**Fig. 4D (GK-Full unedited blot)**

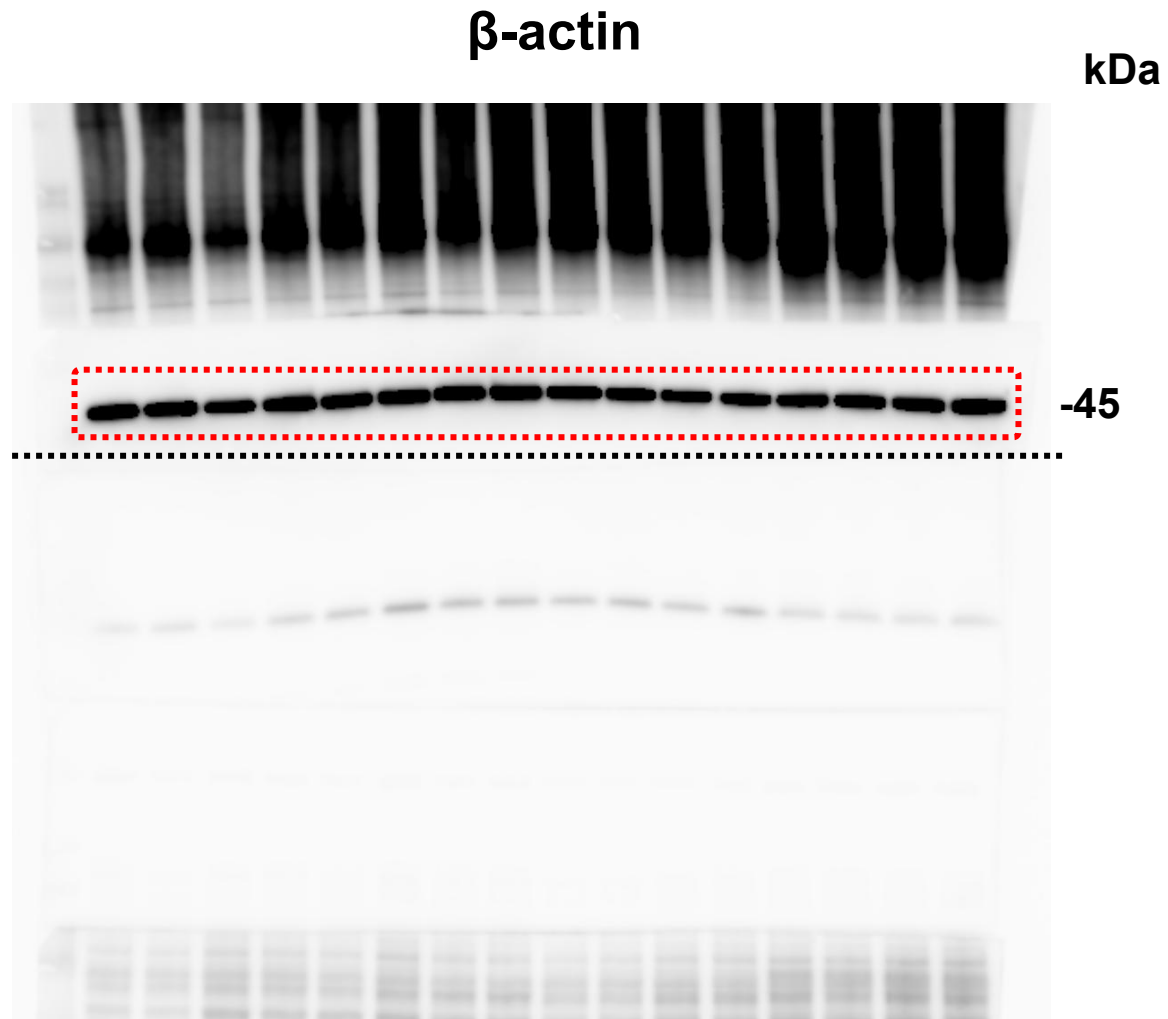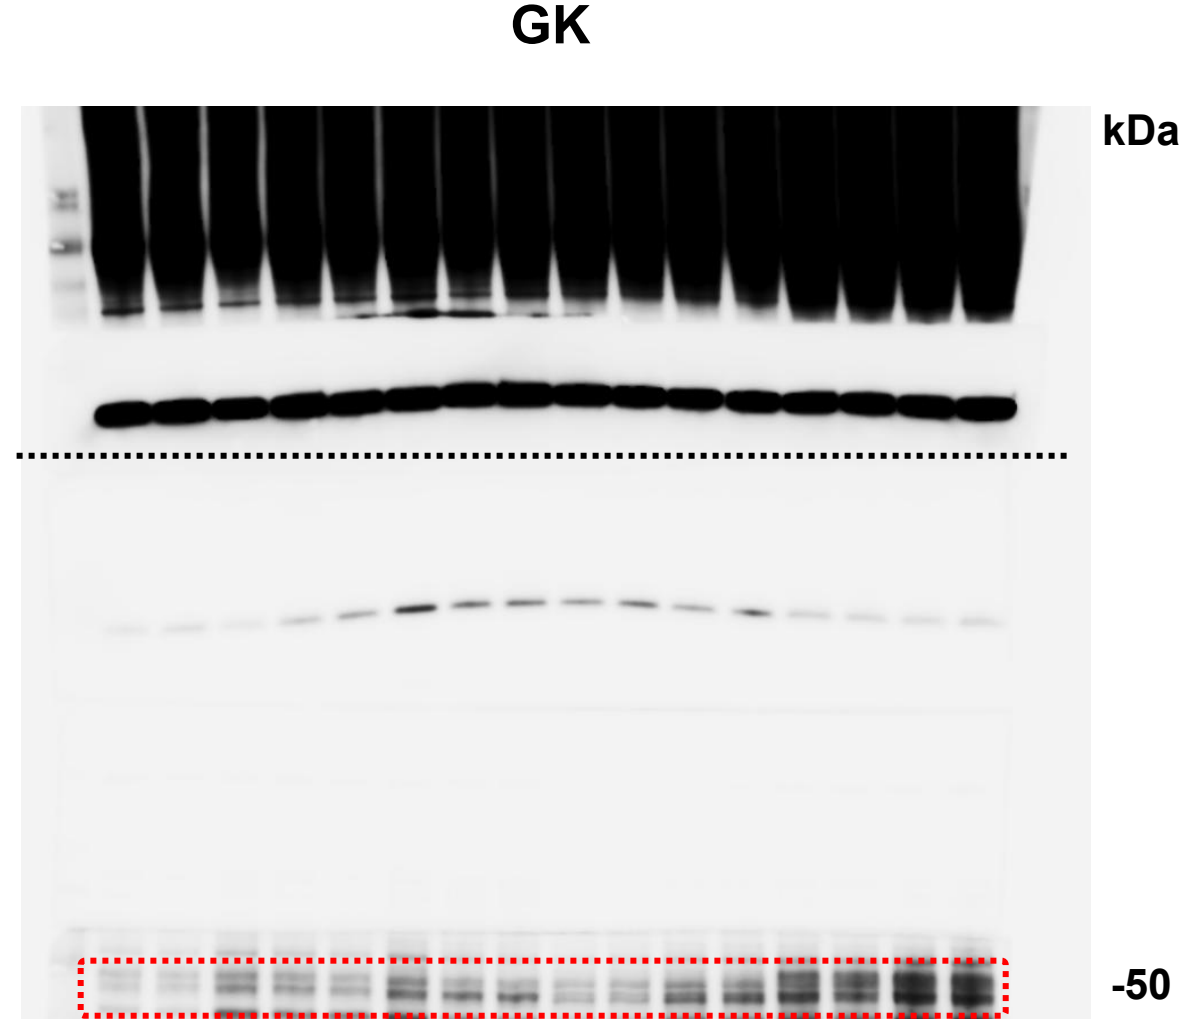

**Note: 1. Separate, noncontiguous lanes from the same samples were used for each antibody.  
2. Bands used in Figures are indicated by boxes in red outlines.**

**Fig. 4D (p-GS-GS-Full unedited blot)**

$\beta$ -actin

GS

p-GS

kDa

kDa

kDa

-45

-84

-84

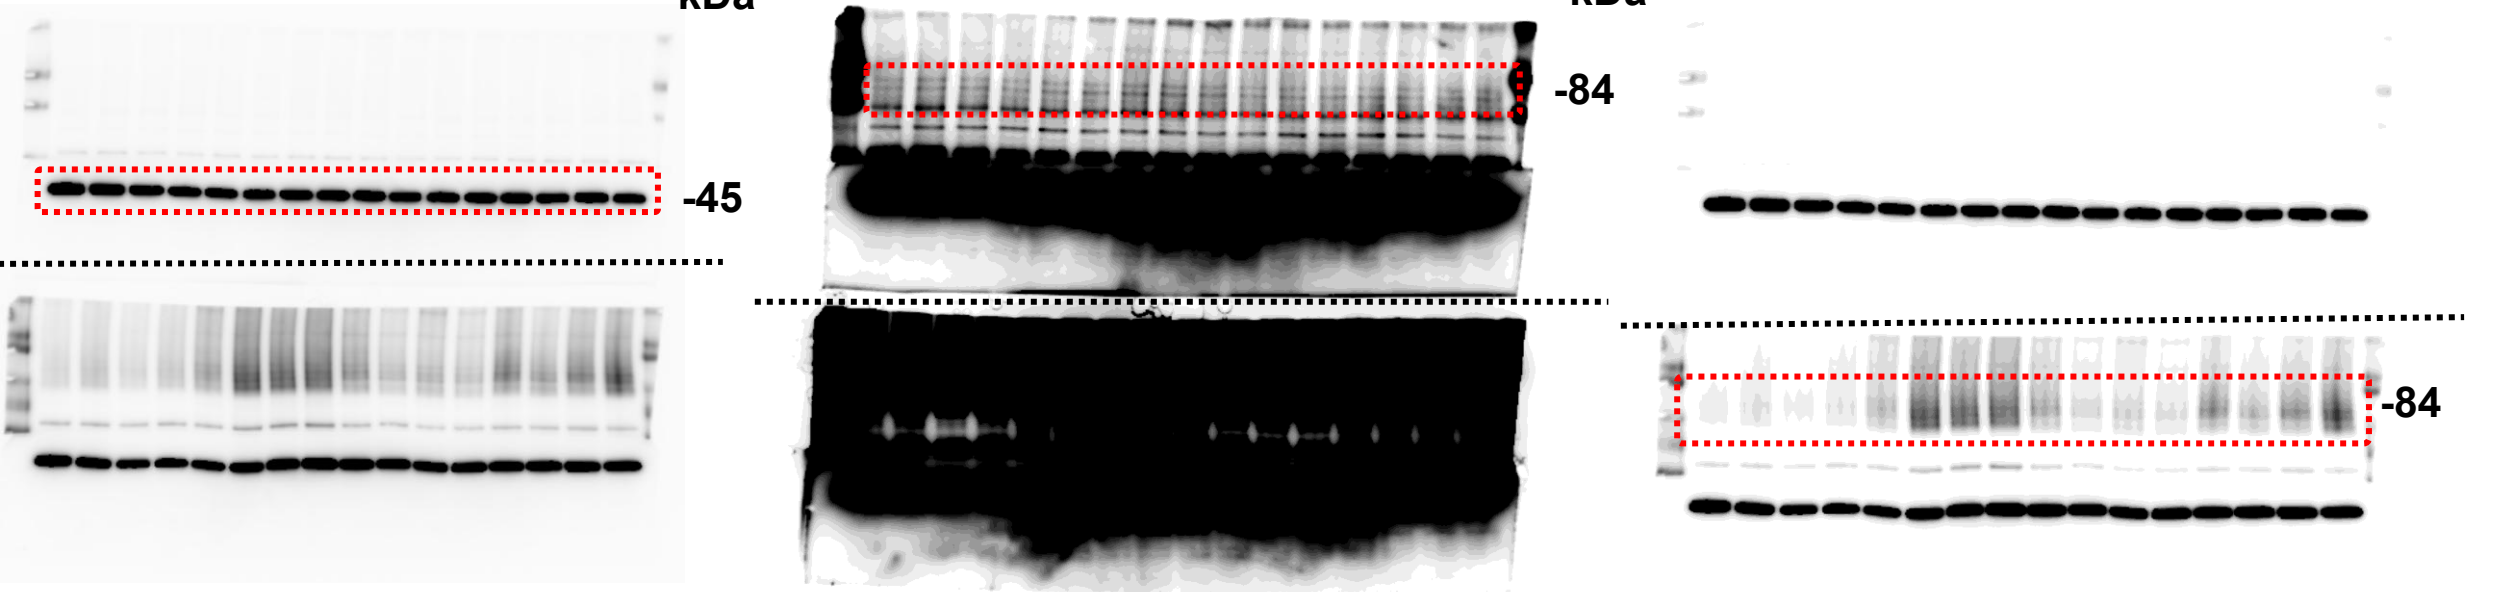

**Note: 1. In GS and  $\beta$ -actin expression, the same blot and different exposure times (short and long exposures shown) were used. Between p-GS and GS expression, separate, noncontiguous lanes from the same samples were used for each antibody.**

**2. Bands used in Figures are indicated by boxes in red outlines.**

**Fig. 4D (p-GP-GP-Full unedited blot)**

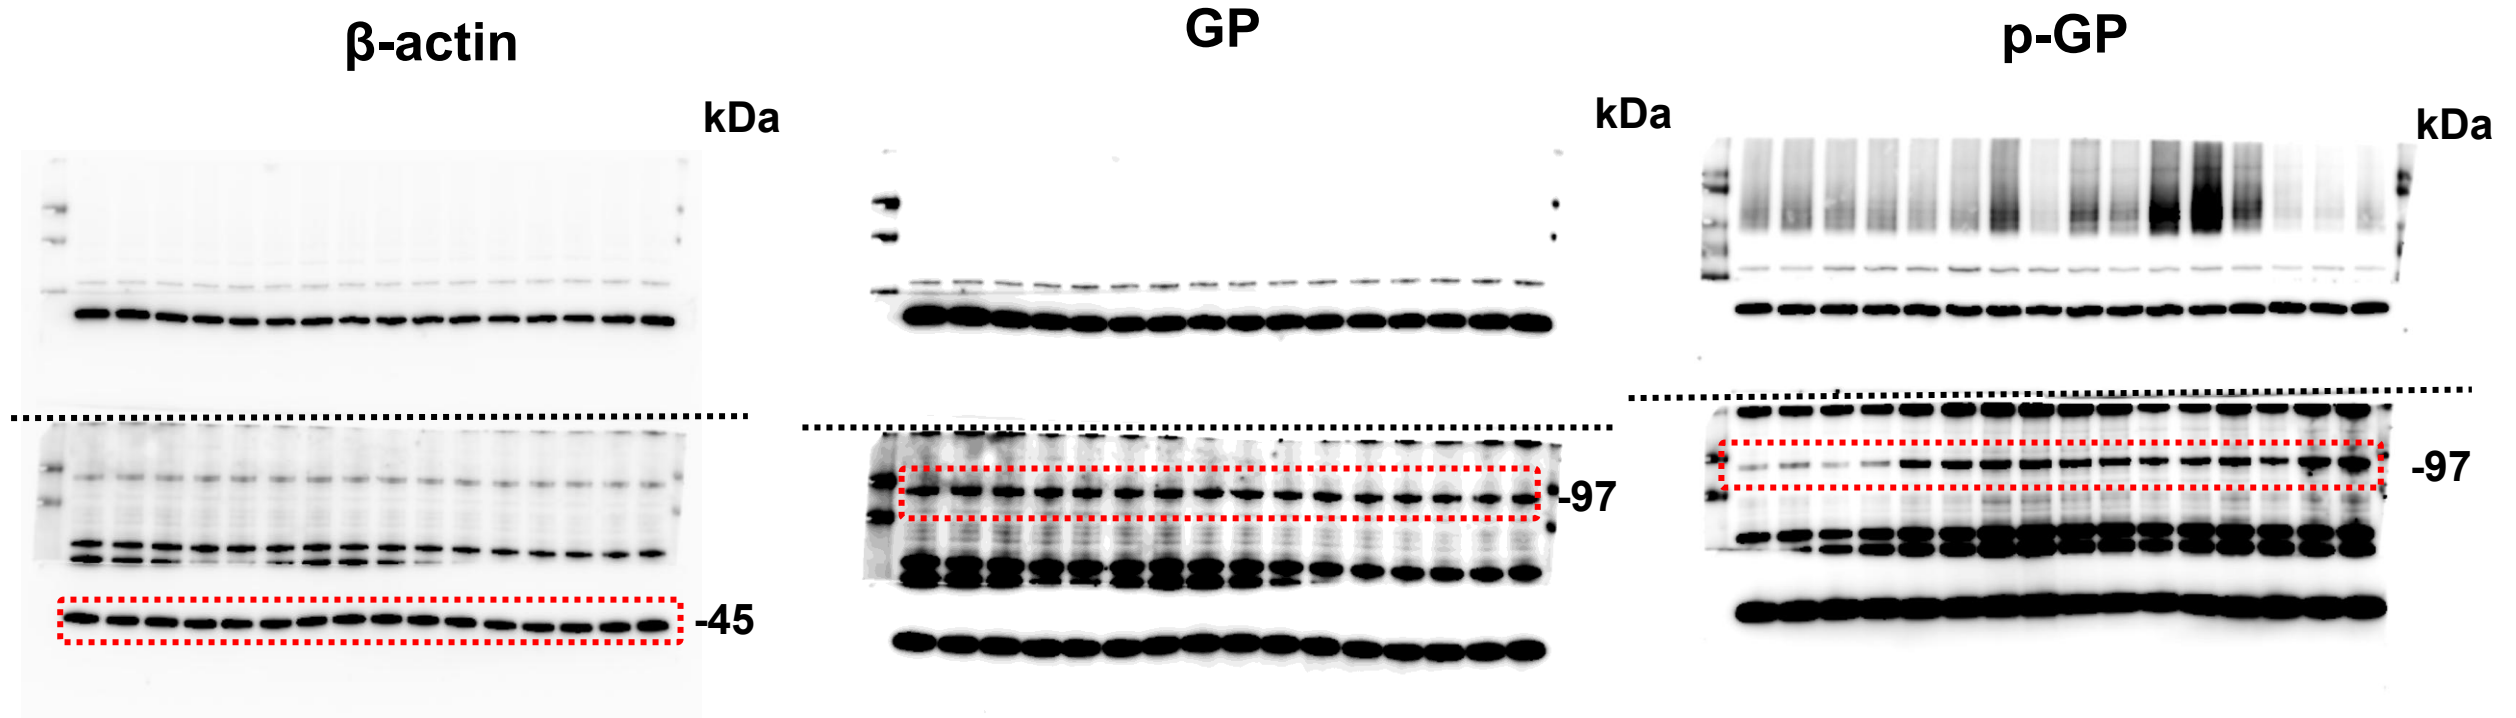

**Note: 1. In GP and  $\beta$ -actin expression, the same blot and different exposure times (short and long exposures shown) were used. Between p-GP and GP expression, separate, noncontiguous lanes from the same samples were used for each antibody.**

**2. Bands used in Figures are indicated by boxes in red outlines.**

**Fig. 4D (PCK1-Full unedited blot)**

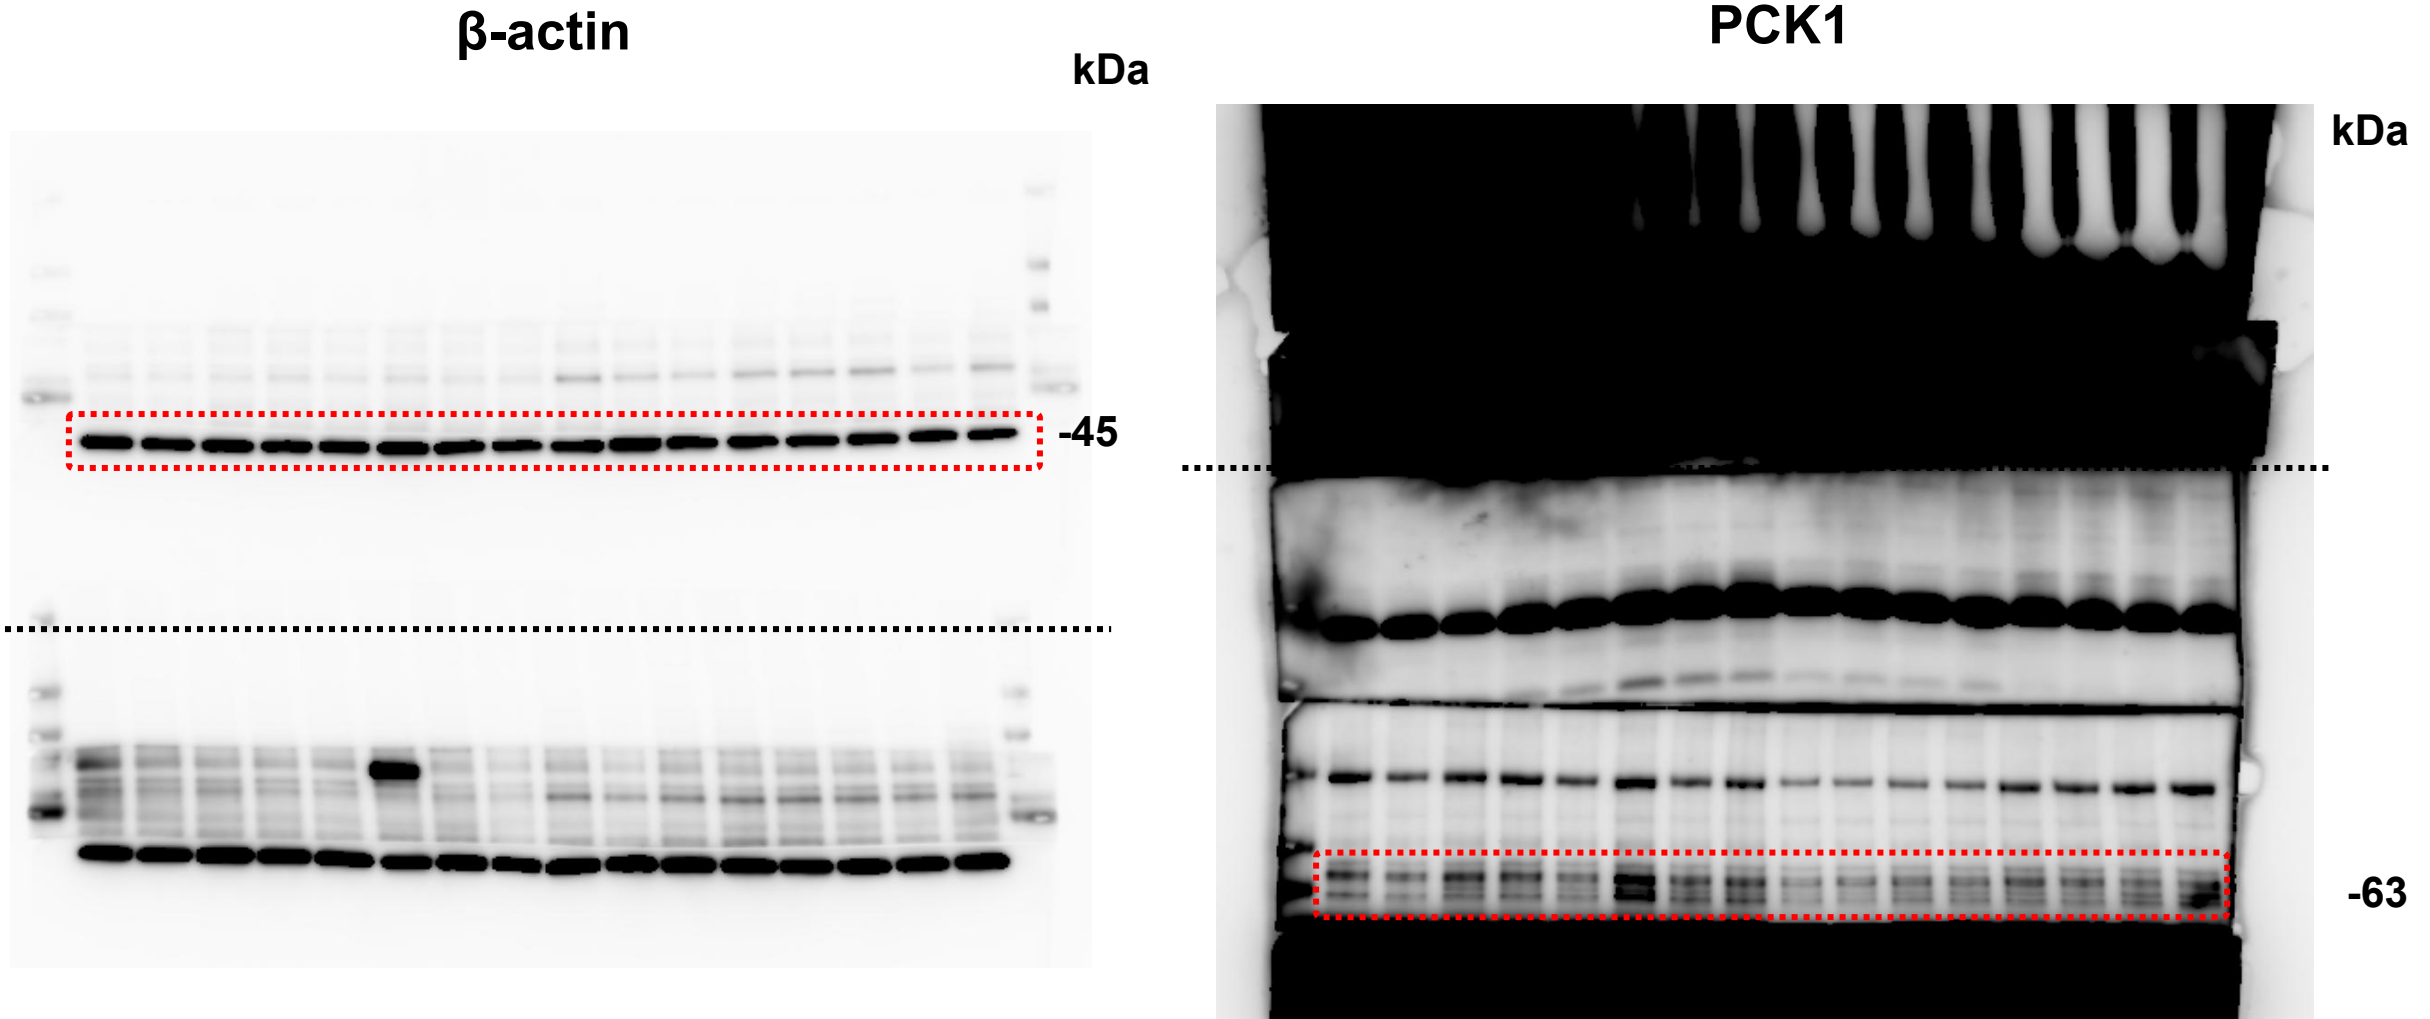

**Note: 1. Separate, noncontiguous lanes from the same samples were used for each antibody.  
2. Bands used in Figures are indicated by boxes in red outlines.**

**Fig. 4G (GLUT2-Full unedited blot)**

$\beta$ -actin

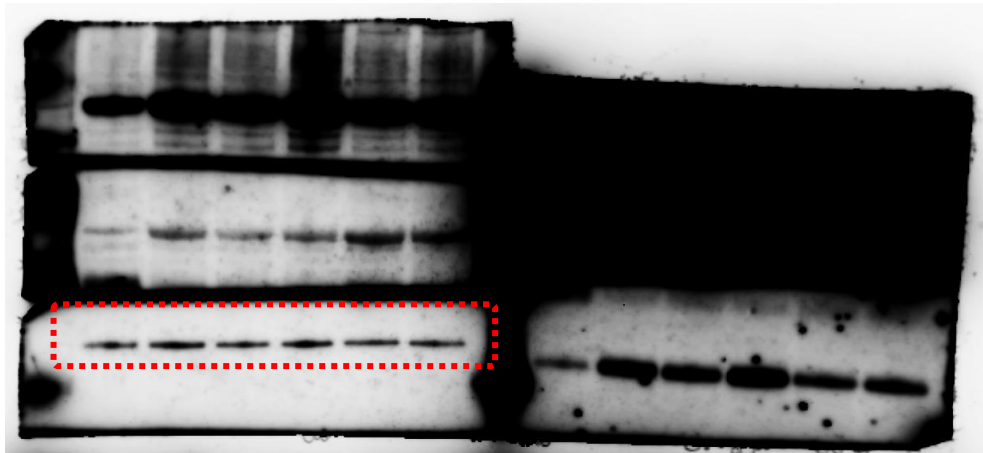

GLUT2

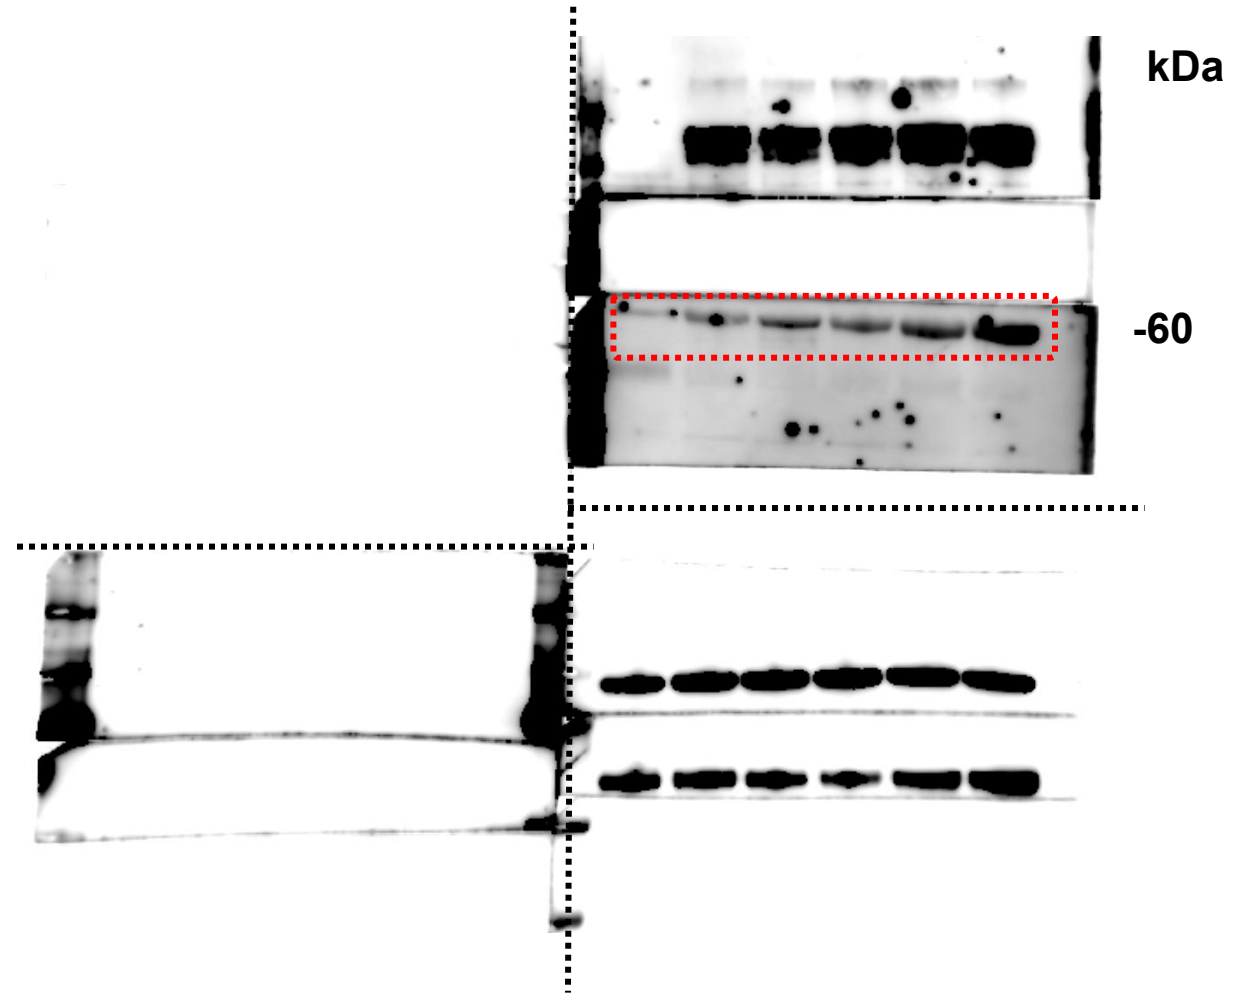

**Note: 1. Separate, noncontiguous lanes from the same samples were used for each antibody.  
2. Bands used in Figures are indicated by boxes in red outlines.**

# Fig. 4G (GK-Full unedited blot)

$\beta$ -actin

See Fig. 4G (GLUT2-Full unedited blot)

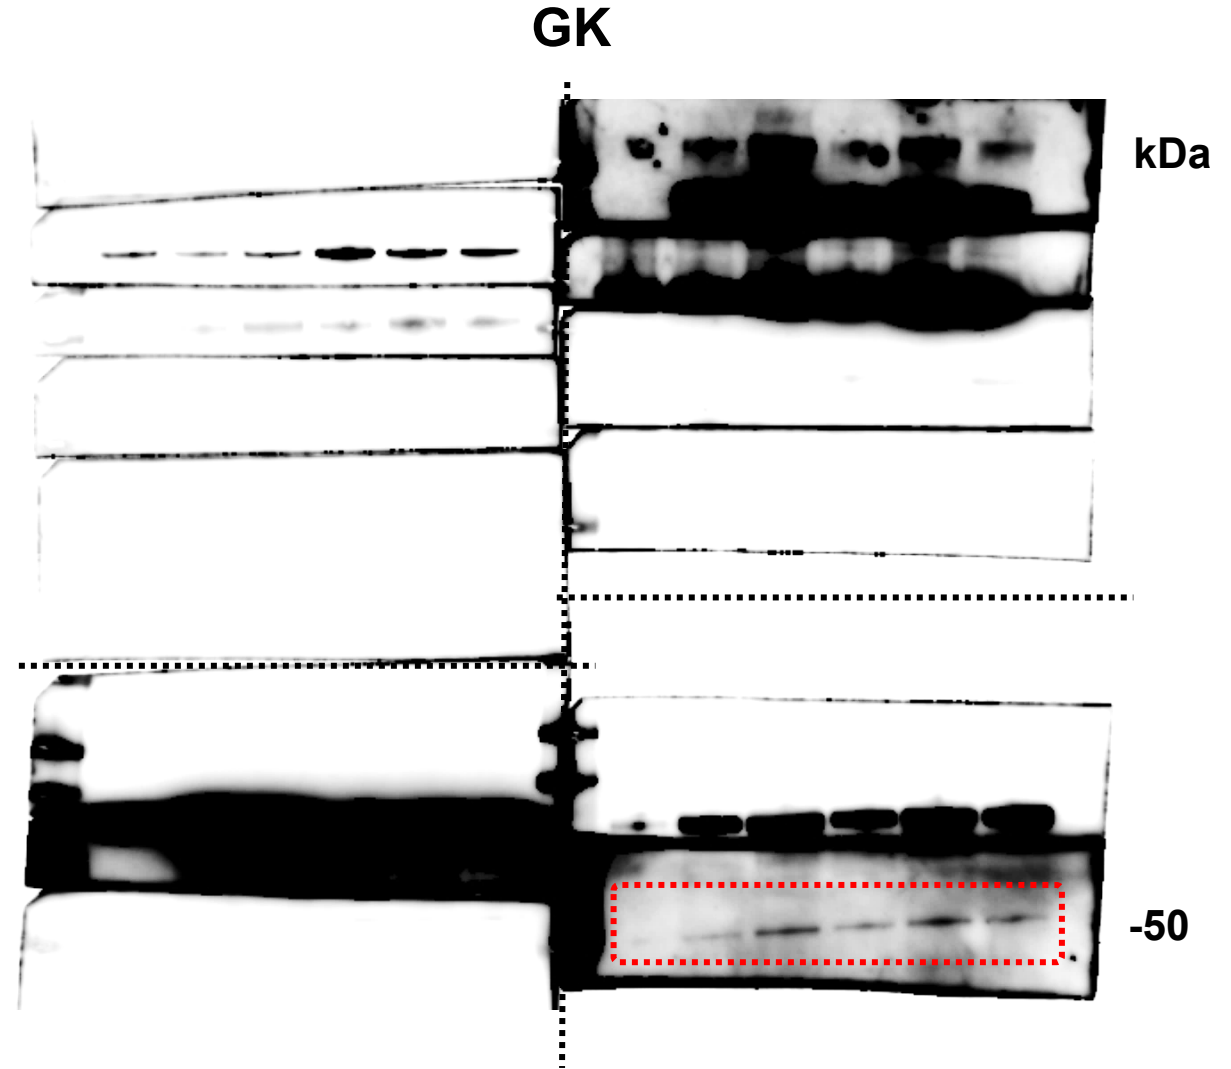

Note: 1. Separate, noncontiguous lanes from the same samples were used for each antibody.  $\beta$ -actin loading control for GK was obtained from the same gel with GLUT2.  
2. Bands used in Figures are indicated by boxes in red outlines.

**Fig. 4G (p-GS-GS-Full unedited blot)**

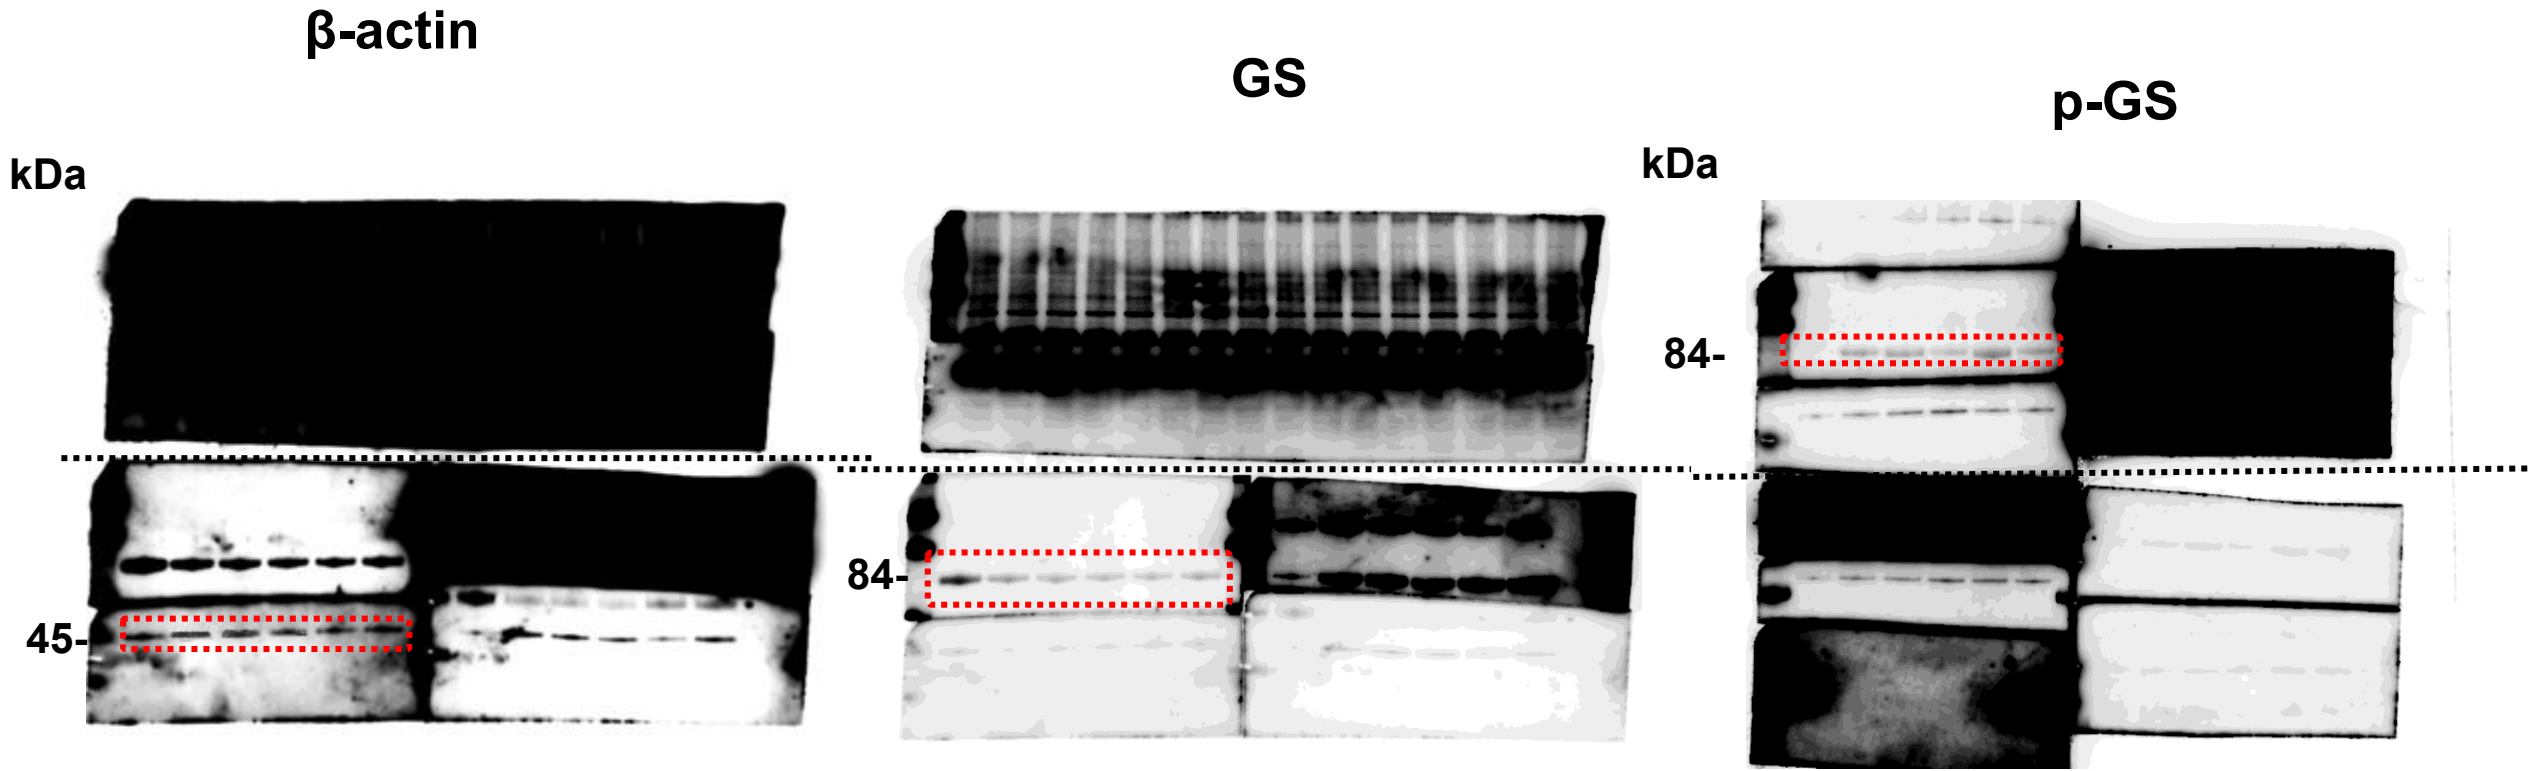

**Note: 1. In GS and  $\beta$ -actin expression, the same blot and different exposure times (short and long exposures shown) were used. Between p-GS and GS expression, separate, noncontiguous lanes from the same samples were used for each antibody.**

**2. Bands used in Figures are indicated by boxes in red outlines.**

**Fig. 4G (p-GP-GP-Full unedited blot)**

$\beta$ -actin

GP

p-GP

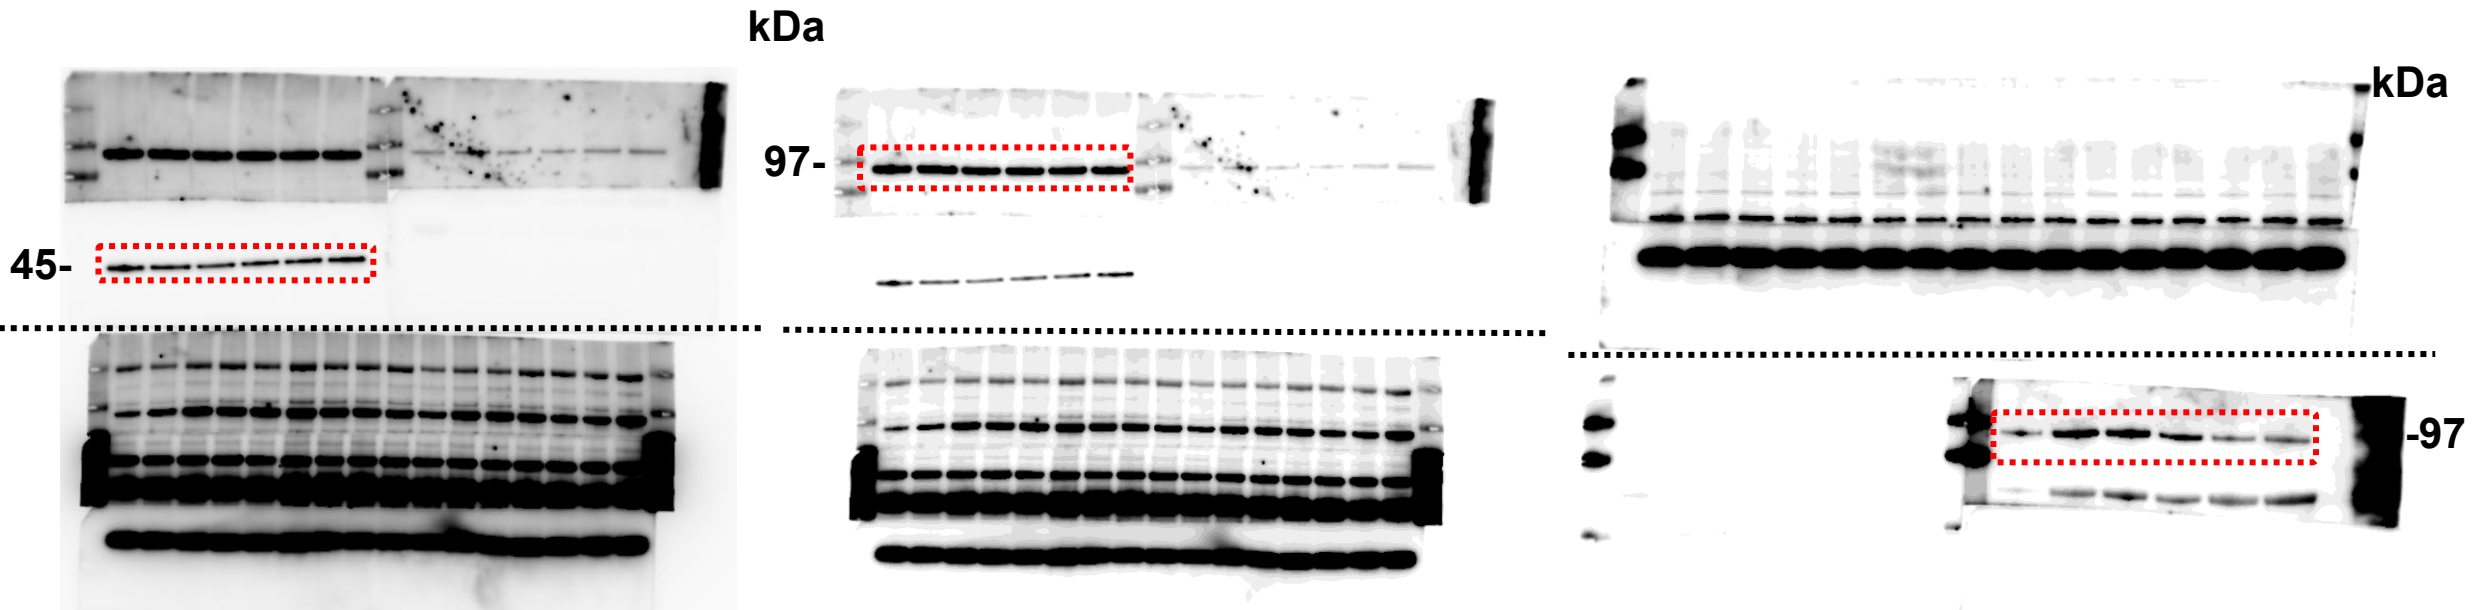

Note: 1. In GP and  $\beta$ -actin expression, the same blot and different exposure times (short and long exposures shown) were used. Between p-GP and GP expression, separate, noncontiguous lanes from the same samples were used for each antibody.

2. Bands used in Figures are indicated by boxes in red outlines.

**Fig. 4G (PCK1-Full unedited blot)**

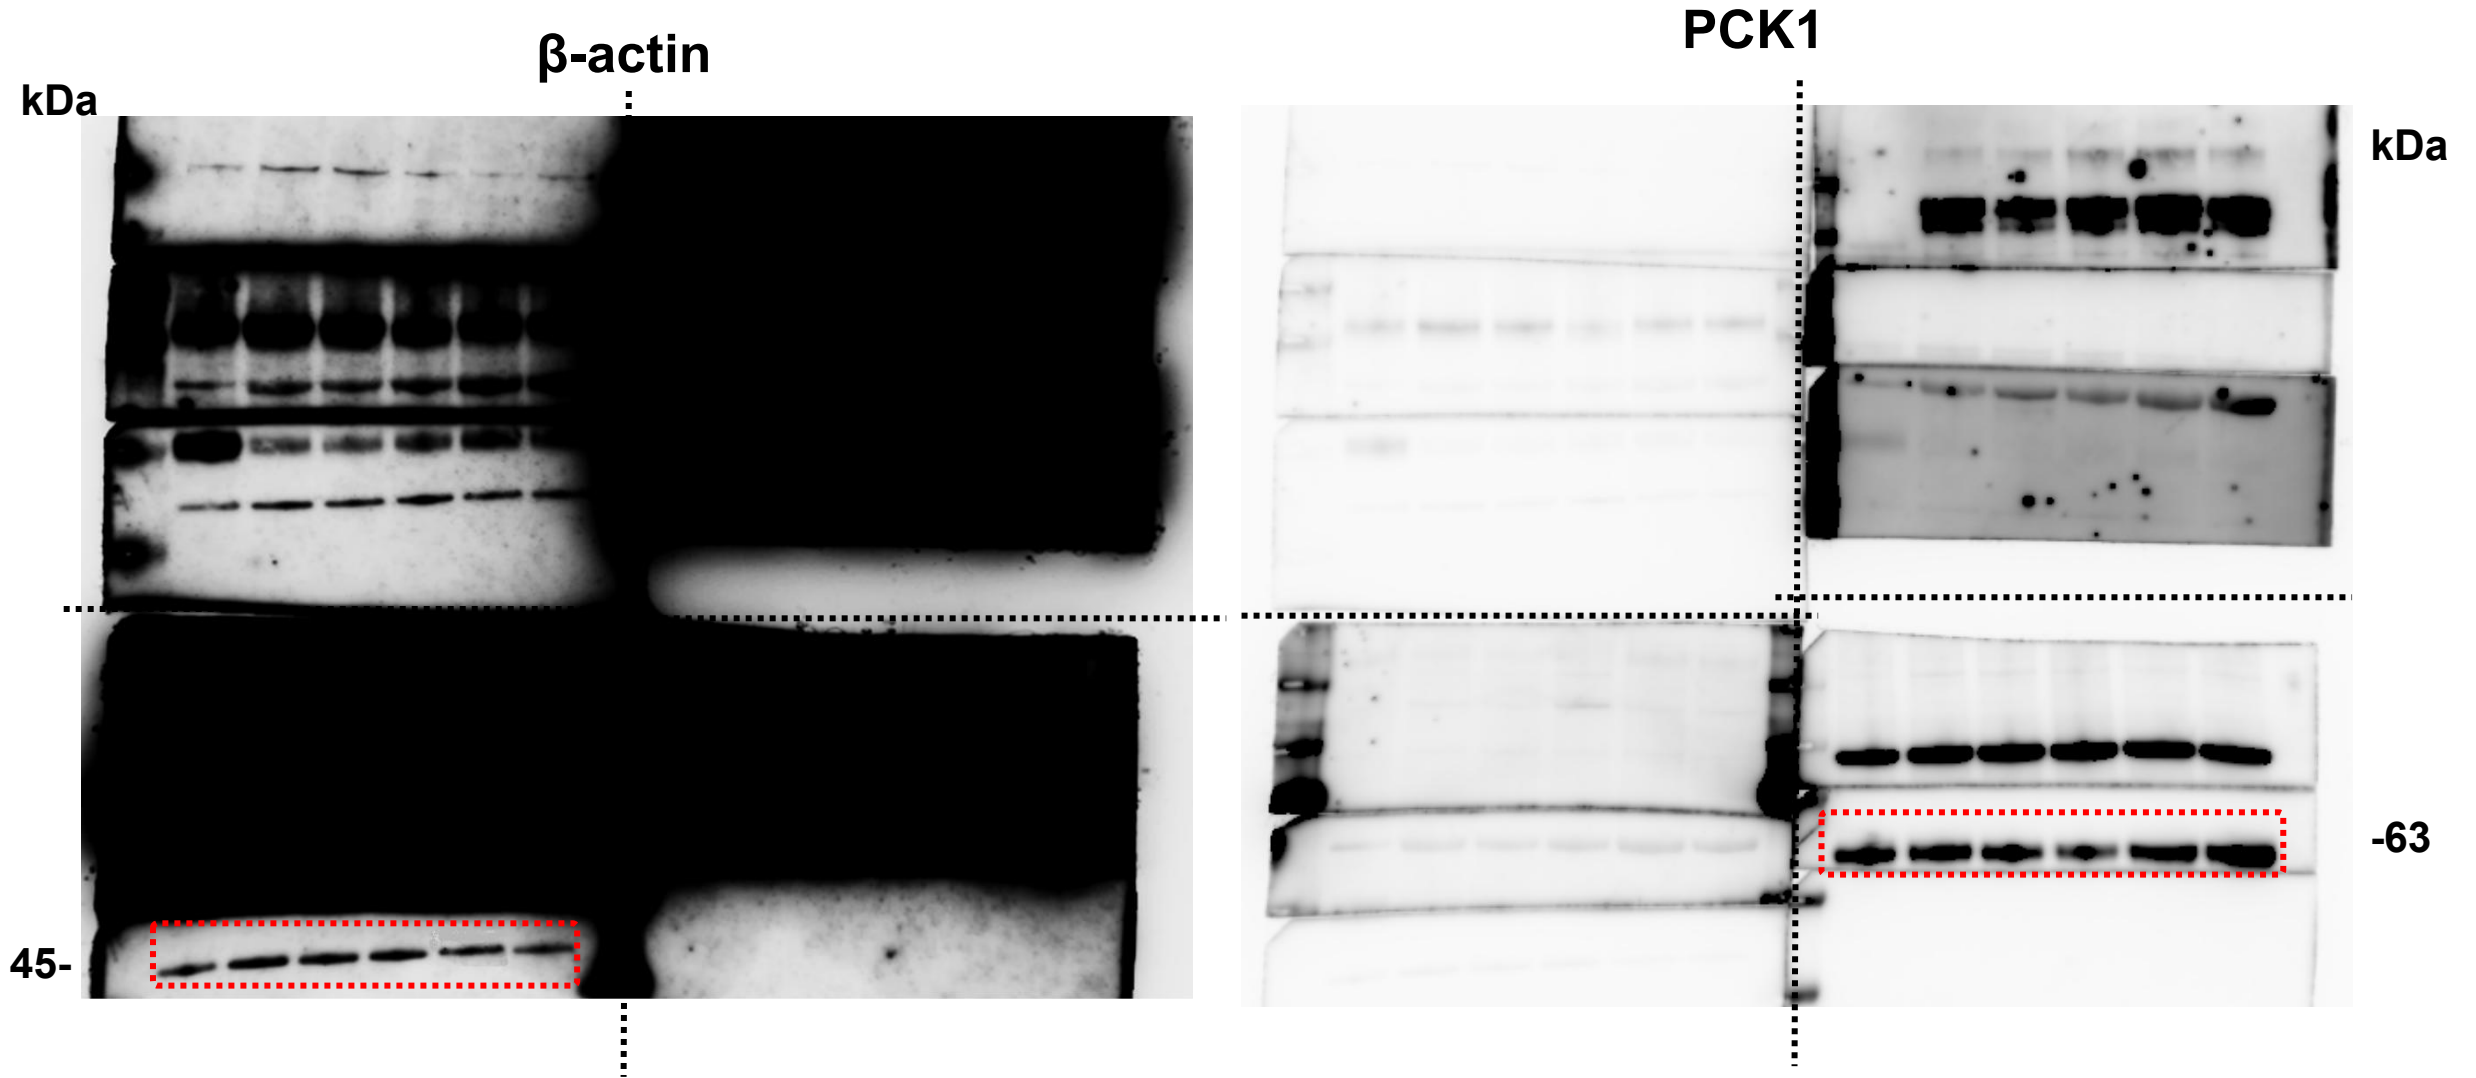

**Note: 1. The same blot and different exposure times (short and long exposures shown) were used.  
2. Bands used in Figures are indicated by boxes in red outlines.**

**Fig. 5D (SOD1-Full unedited blot)**

**$\beta$ -actin**

**kDa**

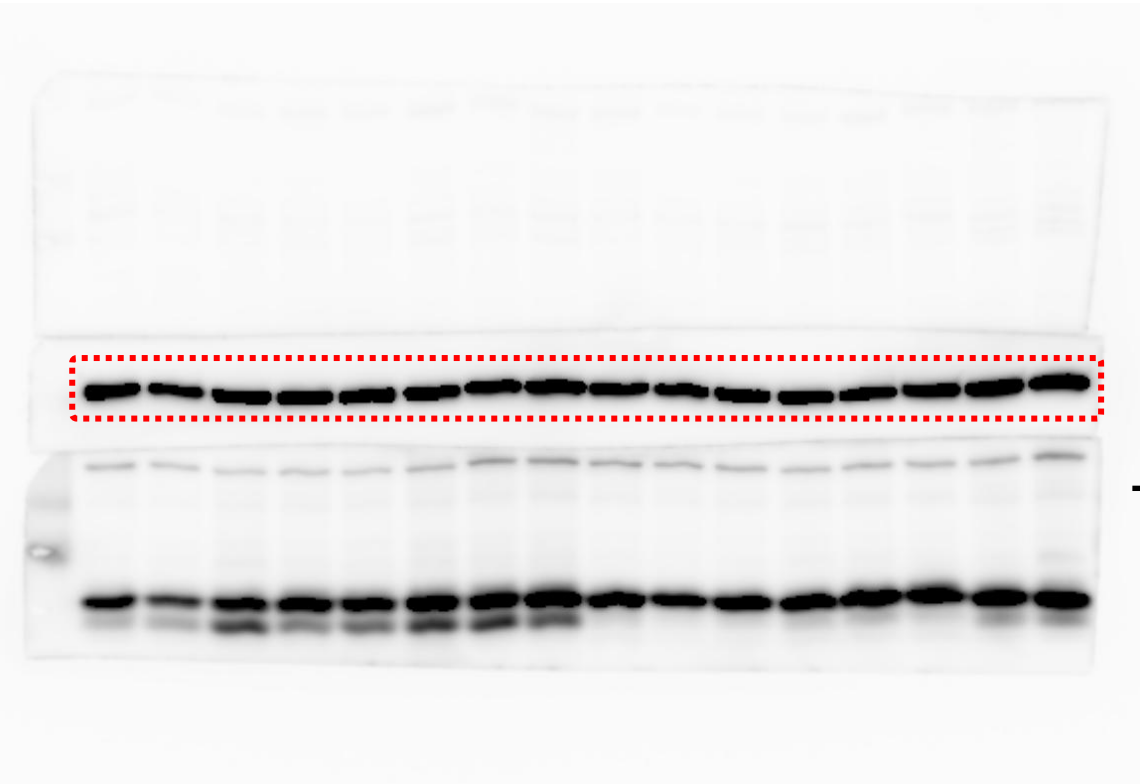

-45

**SOD1**

**kDa**

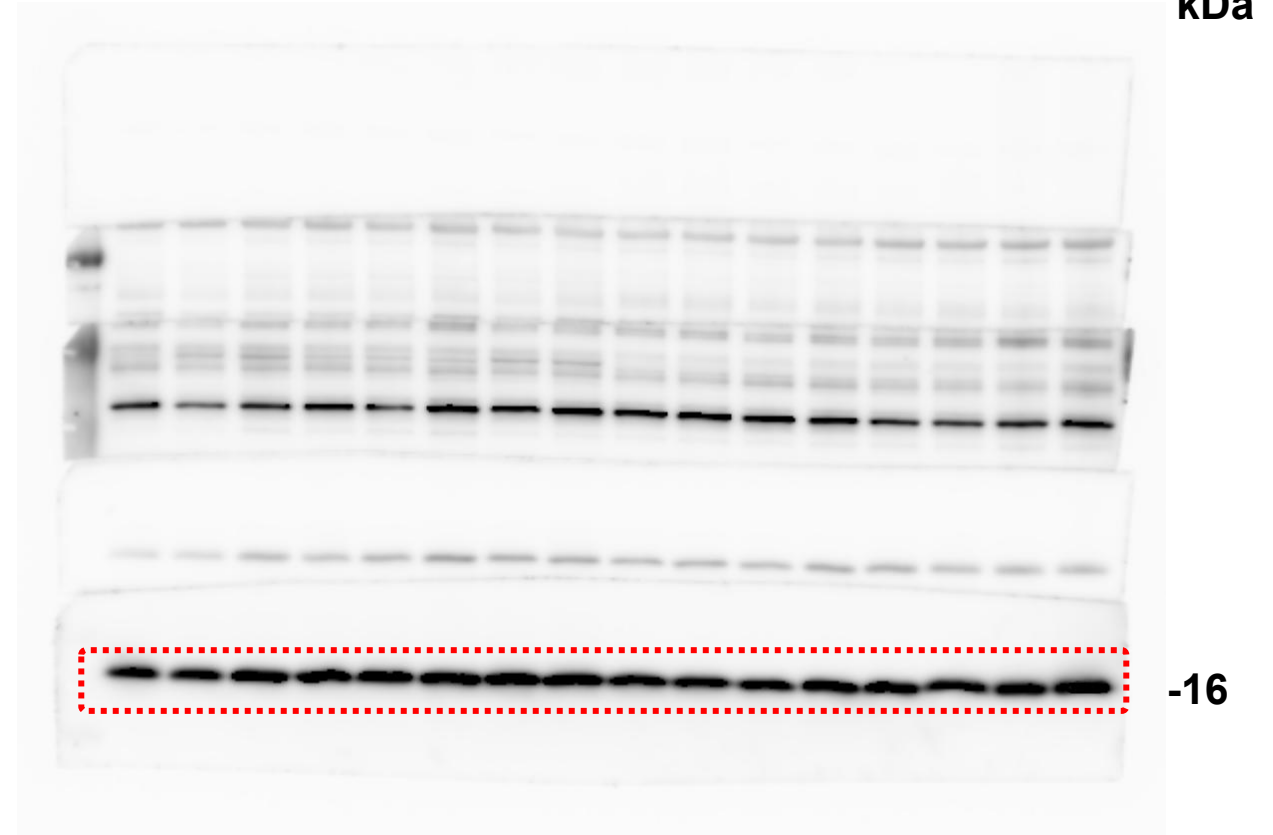

-16

**Note: 1. Separate, noncontiguous lanes from the same samples were used for each antibody.  
2. Bands used in Figures are indicated by boxes in red outlines.**

**Fig. 5D (SOD2-Full unedited blot)**

$\beta$ -actin

kDa

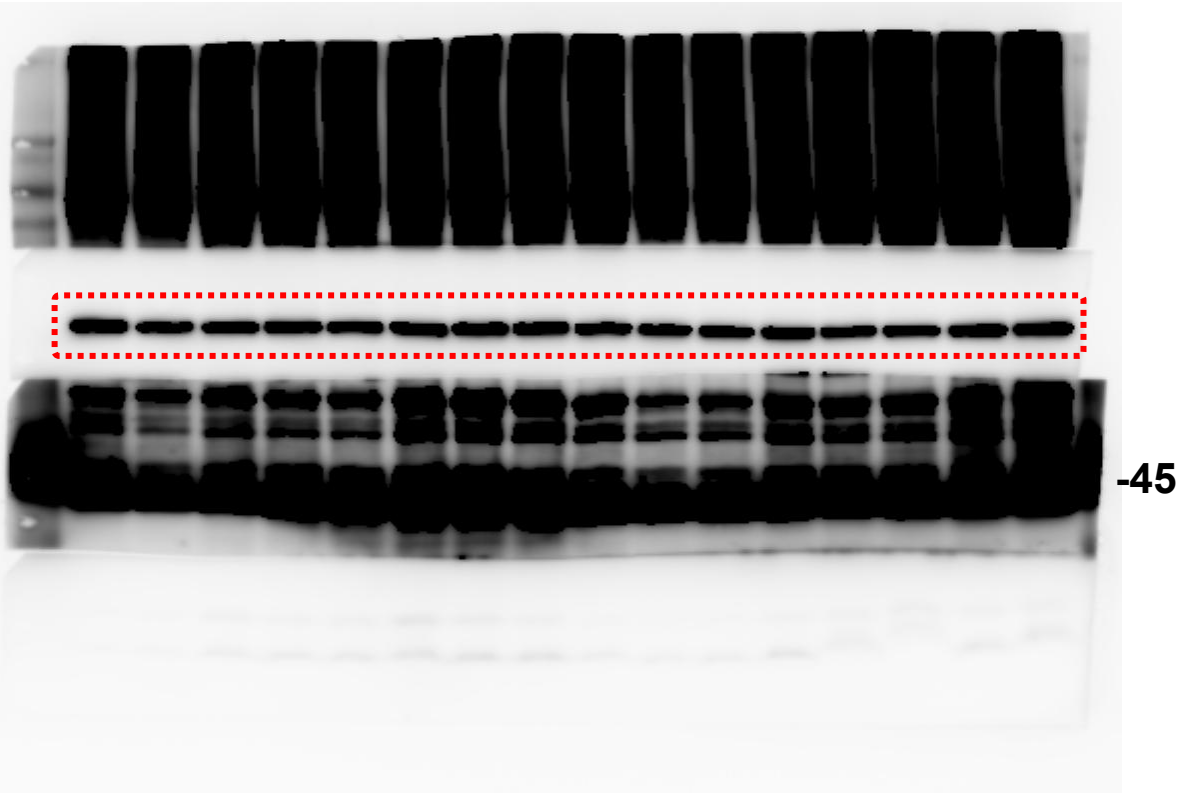

SOD2

kDa

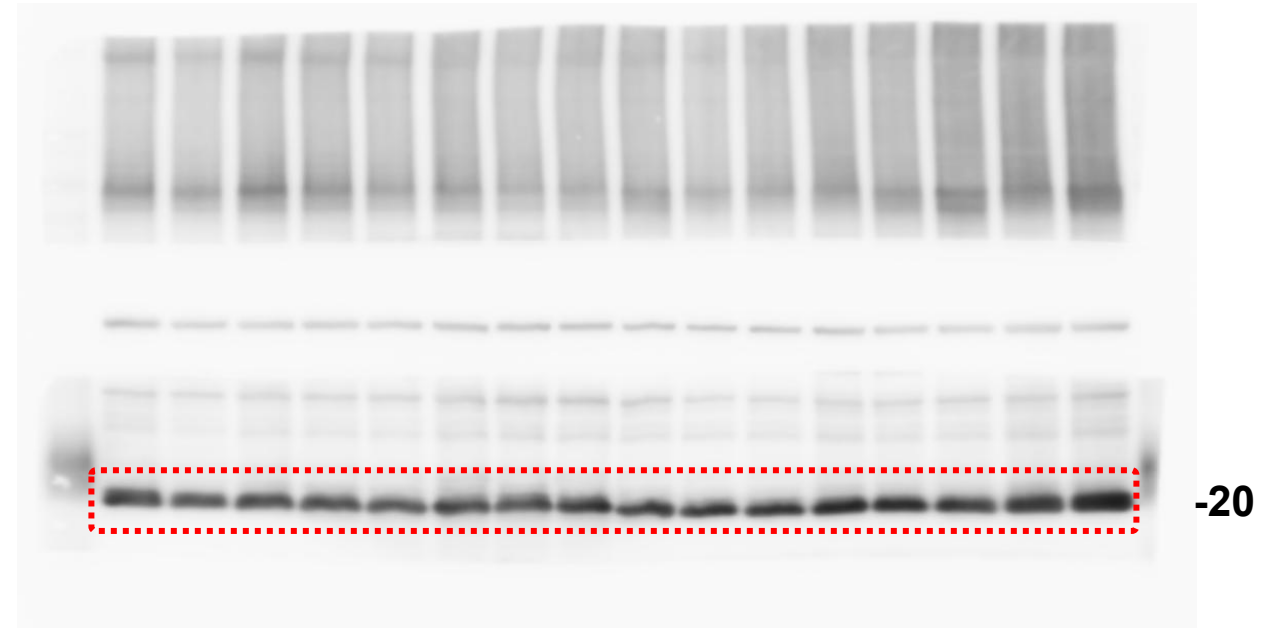

**Note: 1. The same blot and different exposure times (short and long exposures shown) were used.  
2. Bands used in Figures are indicated by boxes in red outlines.**

**Fig. 5D (CAT-Full unedited blot)**

$\beta$ -actin

kDa

CAT

kDa

-45

-60

Note: 1. The same blot and different exposure times (short and long exposures shown) were used.  
2. Bands used in Figures are indicated by boxes in red outlines.

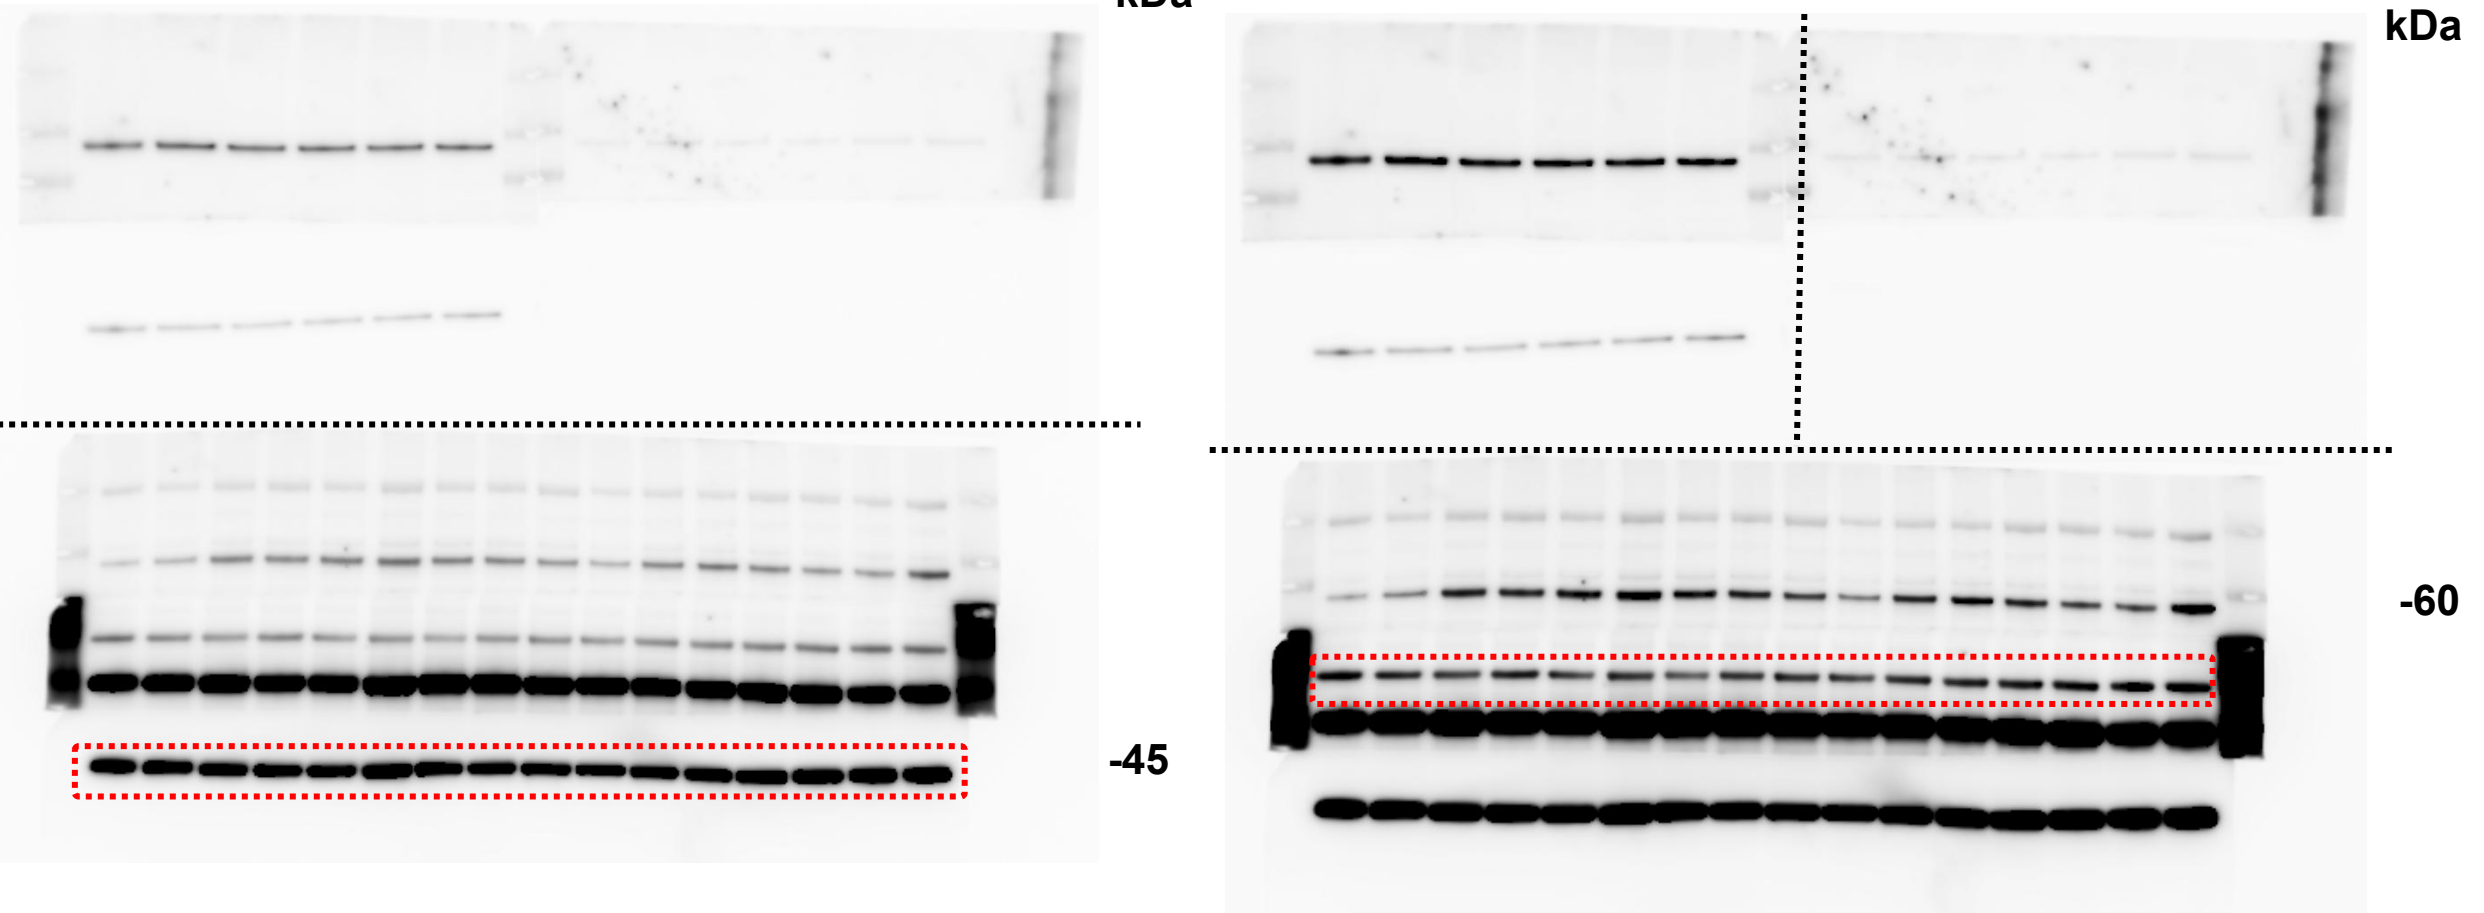

**Fig. 5D (GPX1-Full unedited blot)**

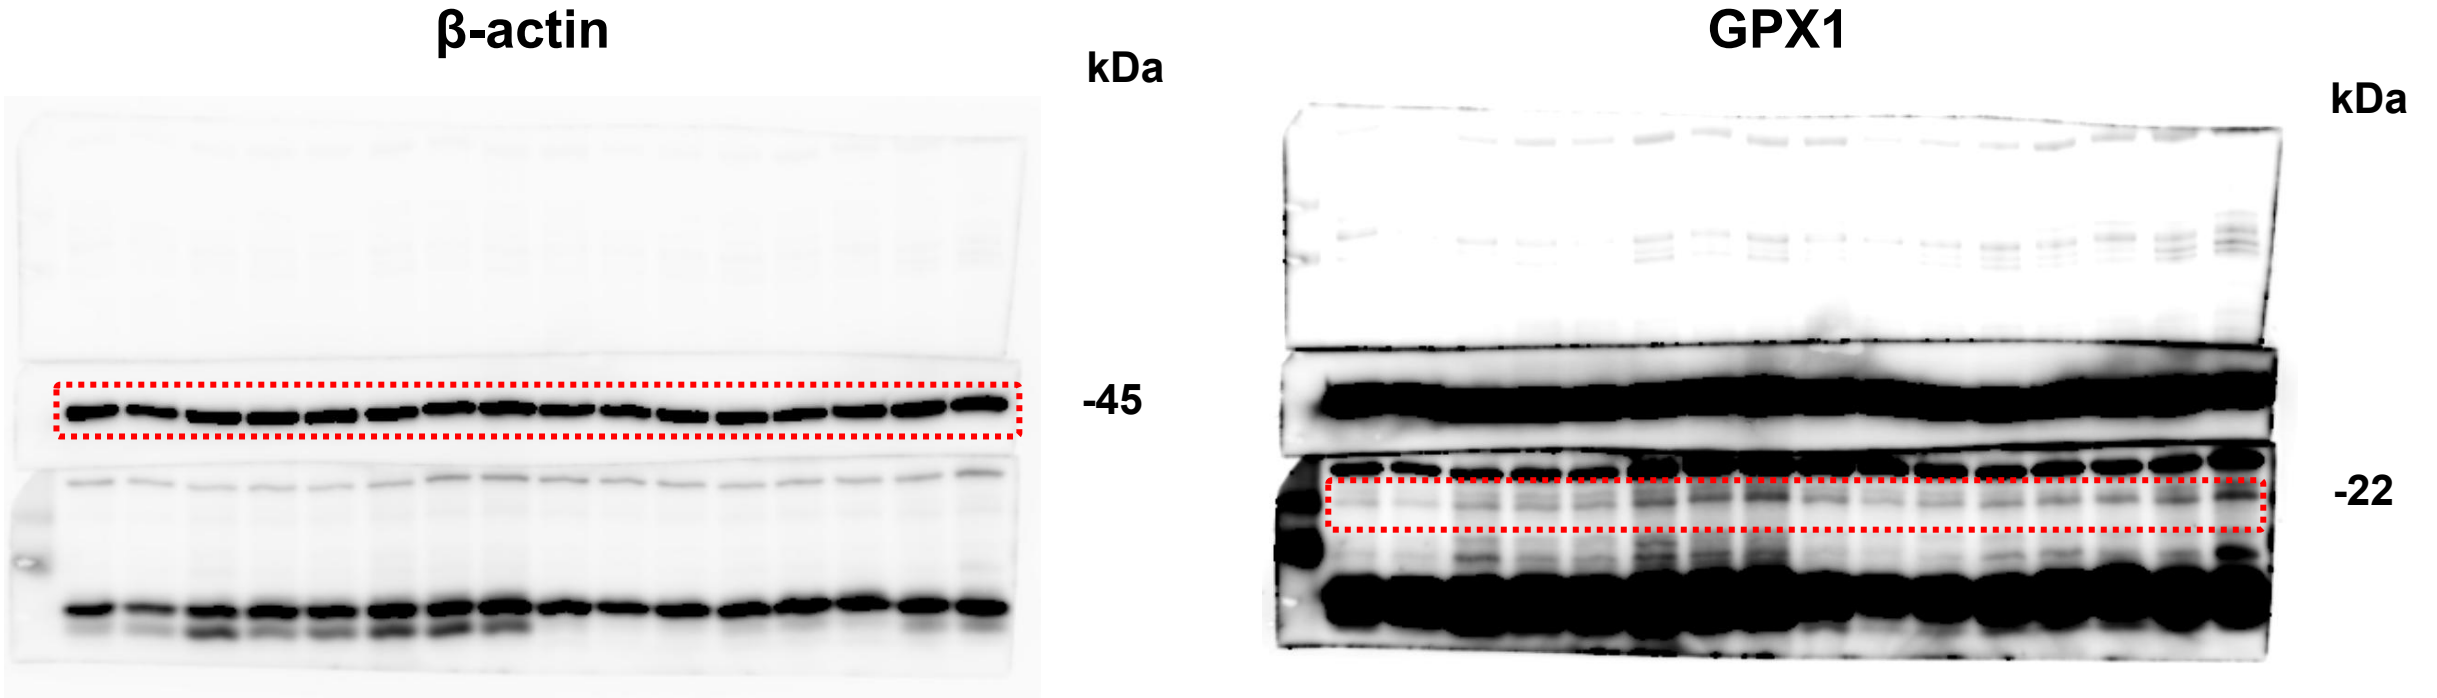

**Note: 1. The same blot and different exposure times (short and long exposures shown) were used.  
2. Bands used in Figures are indicated by boxes in red outlines.**

**Fig. 5F (SOD1-Full unedited blot)**

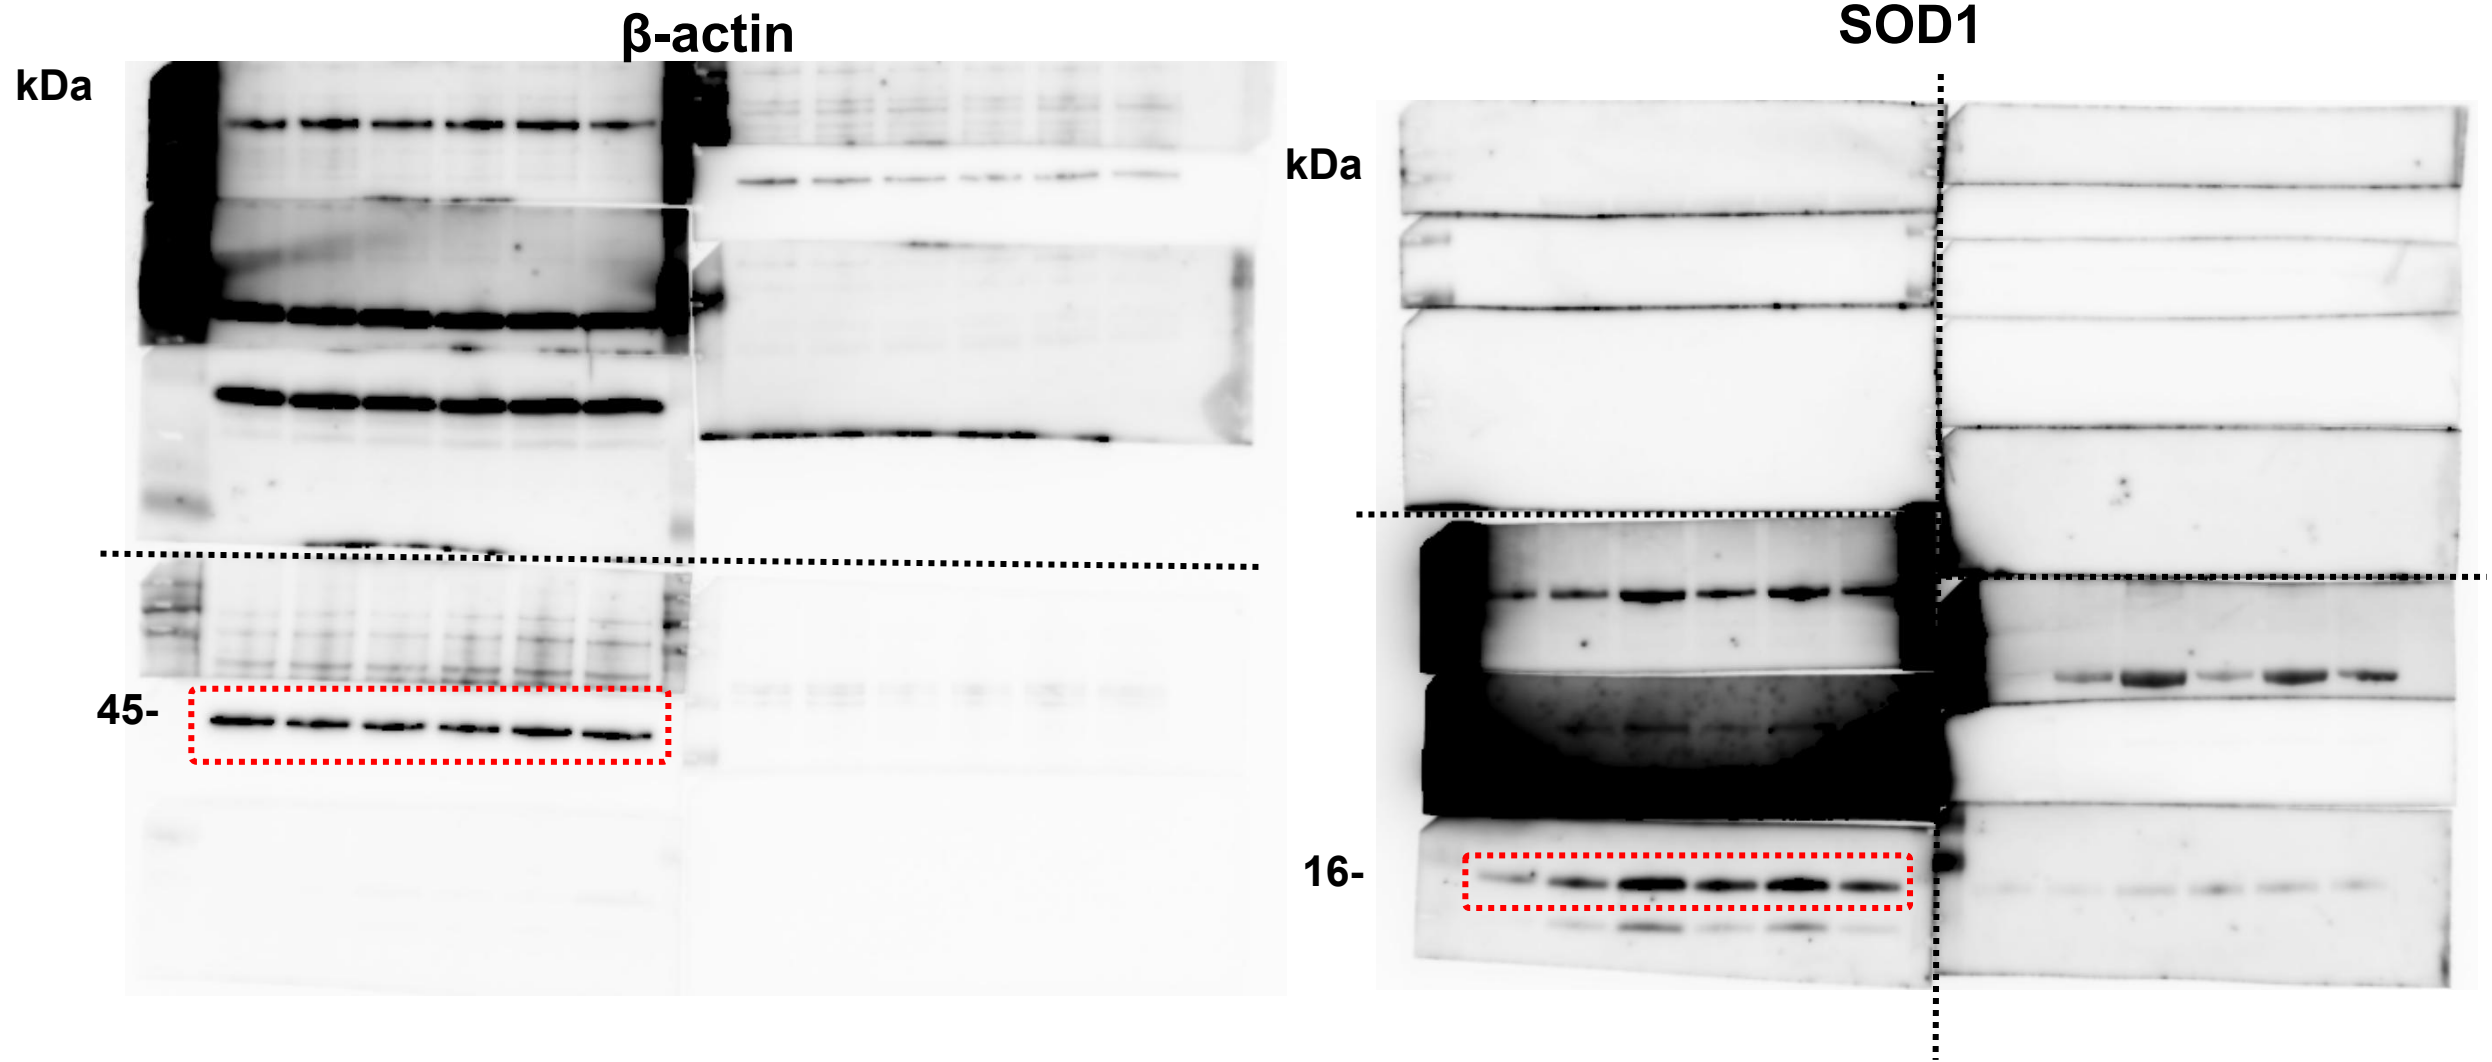

**Note: 1. Separate, noncontiguous lanes from the same samples were used for each antibody.  
2. Bands used in Figures are indicated by boxes in red outlines.**

# Fig. 5F (SOD2-Full unedited blot)

$\beta$ -actin

SOD2

See Fig. 5F (SOD1-Full unedited blot)

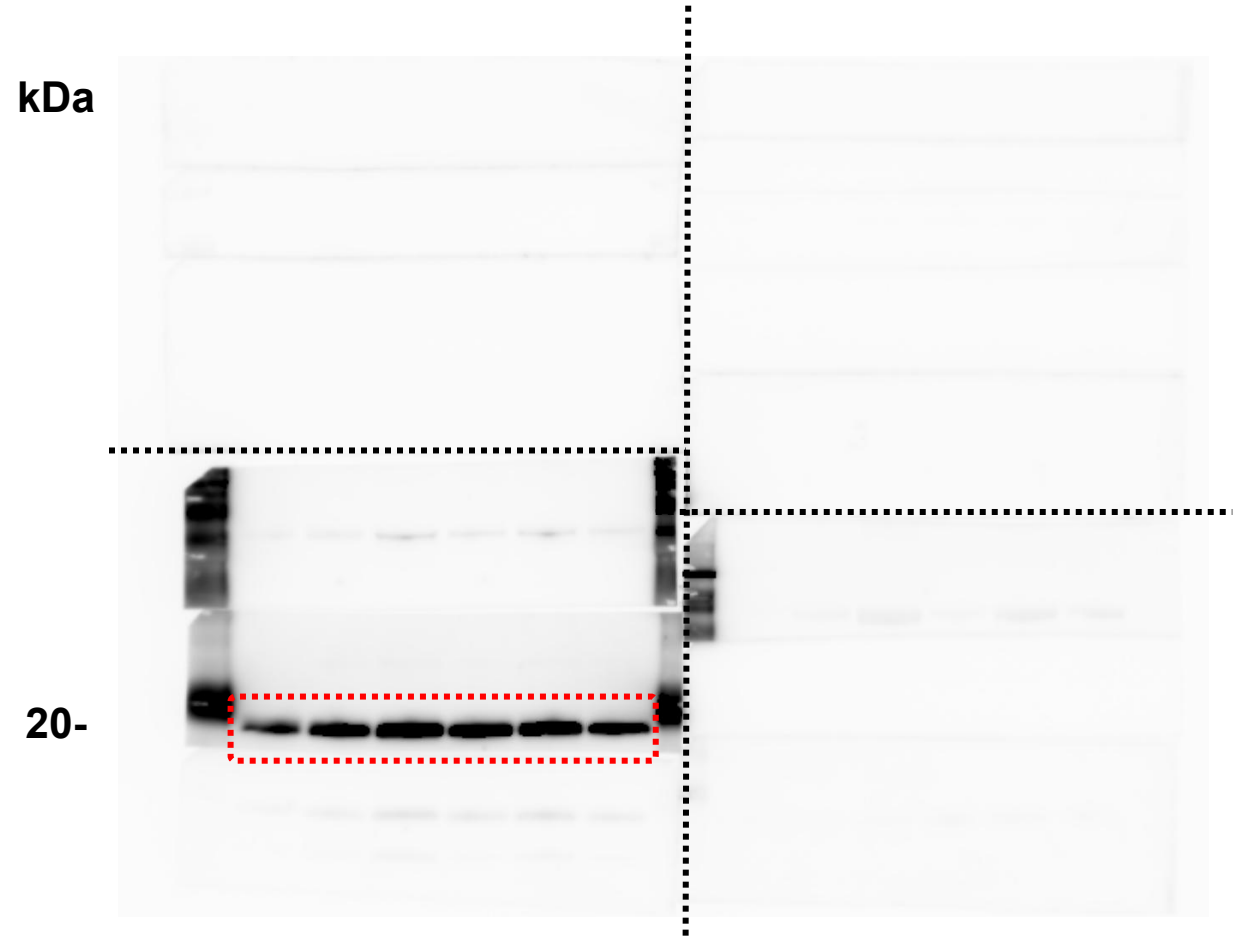

**Note: 1. Separate, noncontiguous lanes from the same samples were used for each antibody.  
2. Bands used in Figures are indicated by boxes in red outlines.**

# Fig. 5F (CAT-Full unedited blot)

$\beta$ -actin

See Fig. 5F (SOD1-Full unedited blot)

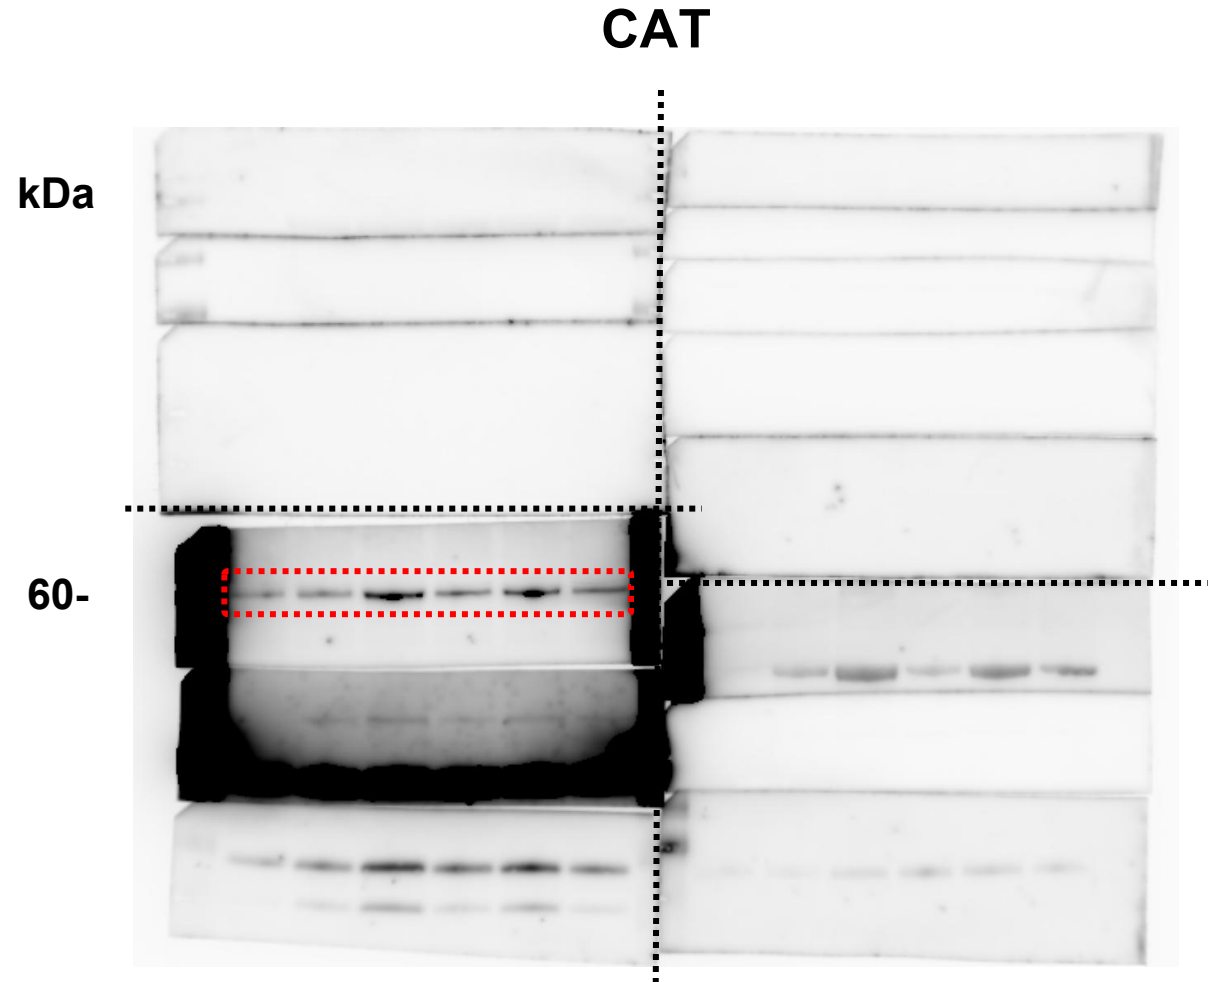

**Note: 1. Separate, noncontiguous lanes from the same samples were used for each antibody.  
2. Bands used in Figures are indicated by boxes in red outlines.**

# Fig. 5F (GPX1-Full unedited blot)

$\beta$ -actin

GPX1

kDa

See Fig. 5F (SOD1-Full unedited blot)

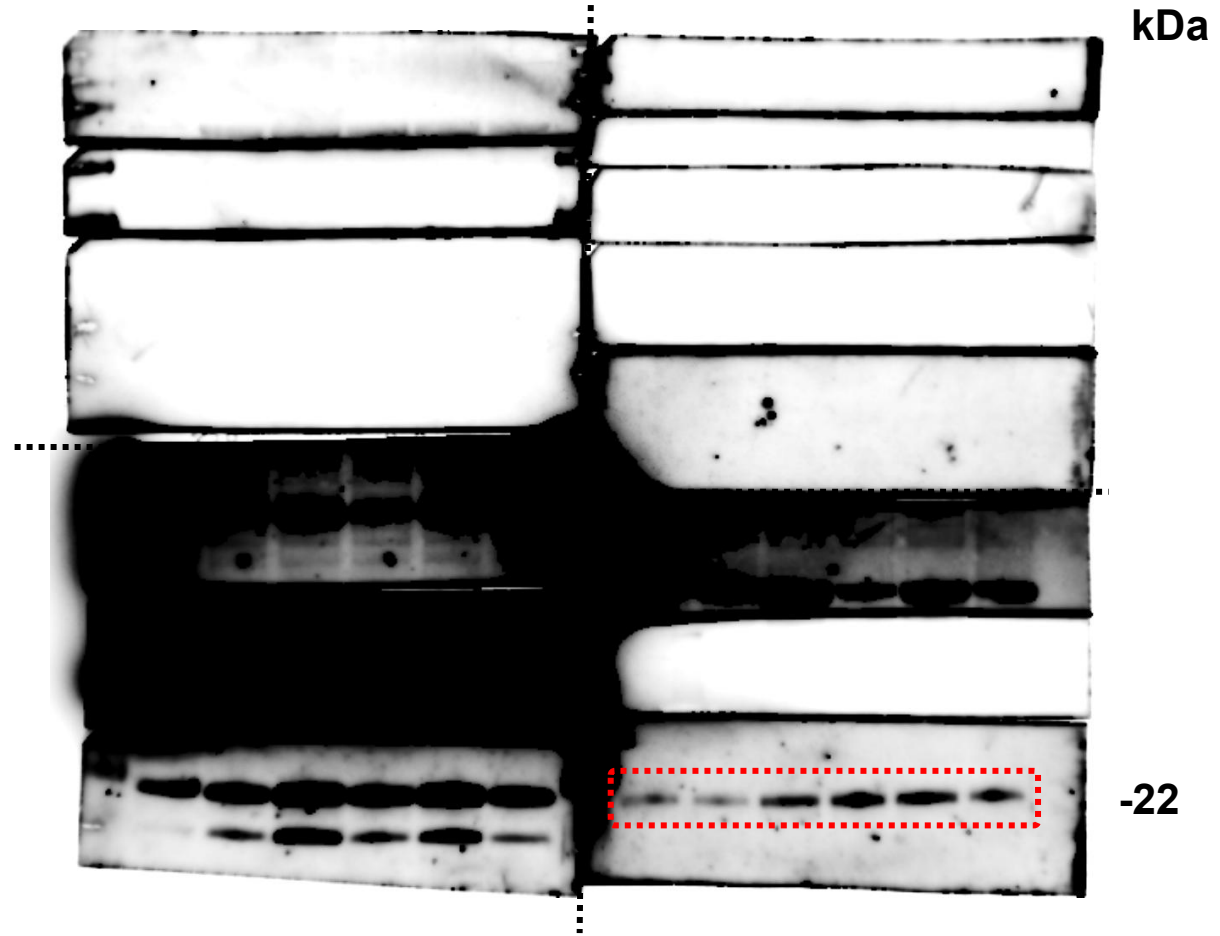

Note: 1. Separate, noncontiguous lanes from the same samples were used for each antibody.  
2. Bands used in Figures are indicated by boxes in red outlines.

**Fig. 6C (Cleaved-caspase-3/Caspase-3-Full unedited blot)**

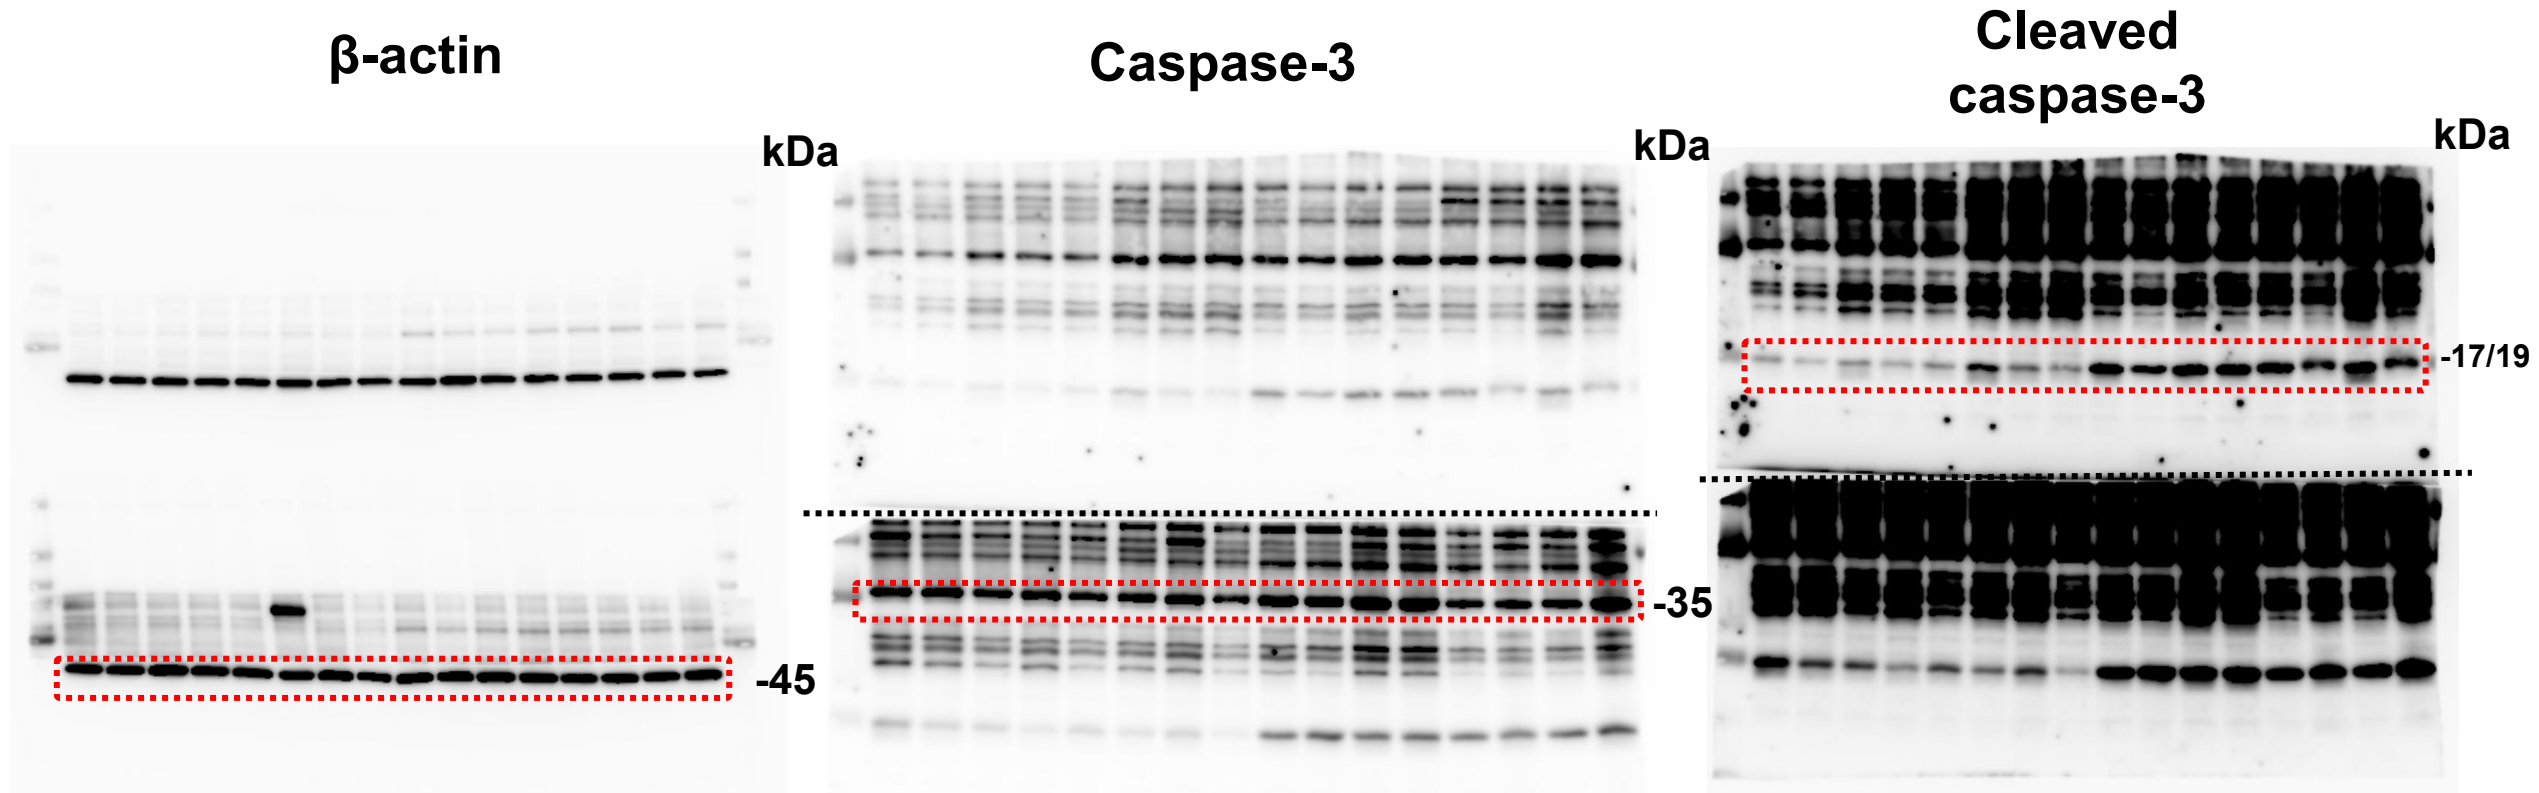

**Note: 1. In Cleaved caspase-3 and Caspase-3 expression, the same blot and different exposure times (short and long exposures shown) were used. Between Caspase-3 and  $\beta$ -actin expression, separate, noncontiguous lanes from the same samples were used for each antibody.**

**2. Bands used in Figures are indicated by boxes in red outlines.**

**Fig. 6C (BAK-Full unedited blot)**

$\beta$ -actin

BAK

**See Fig. 1H (CPT1-Full unedited blot)**

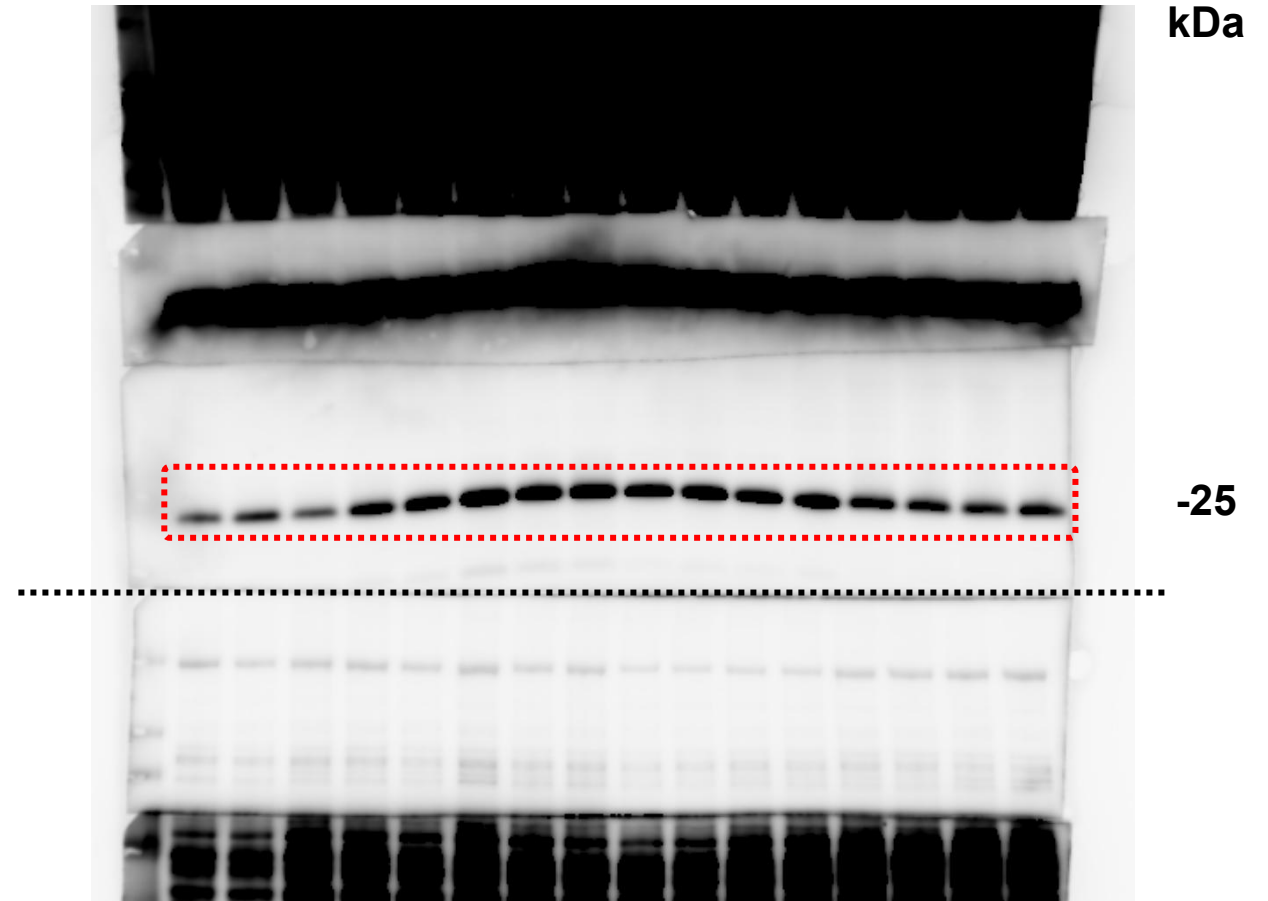

**Note: 1. The same blot and different exposure times (short and long exposures shown) were used.  $\beta$ -actin loading control for BAK was obtained from the same gel with CPT1.**  
**2. Bands used in Figures are indicated by boxes in red outlines.**

**Fig. 6C (BAX-Full unedited blot)**

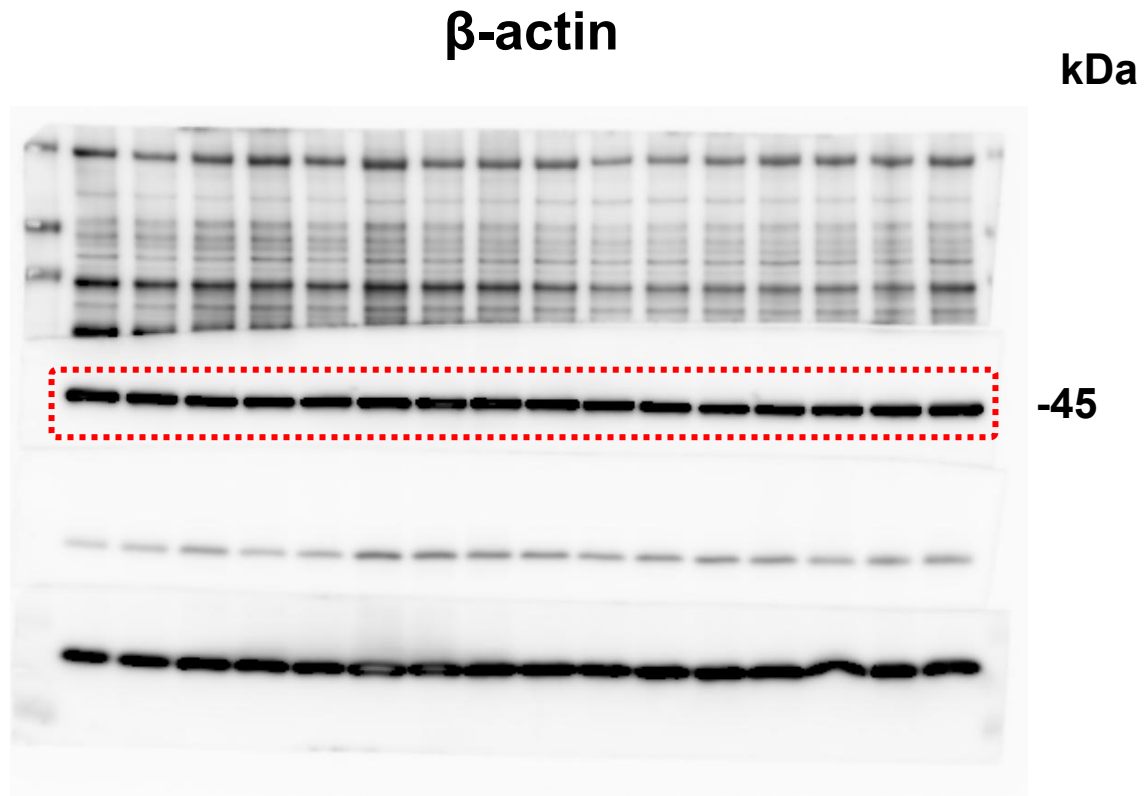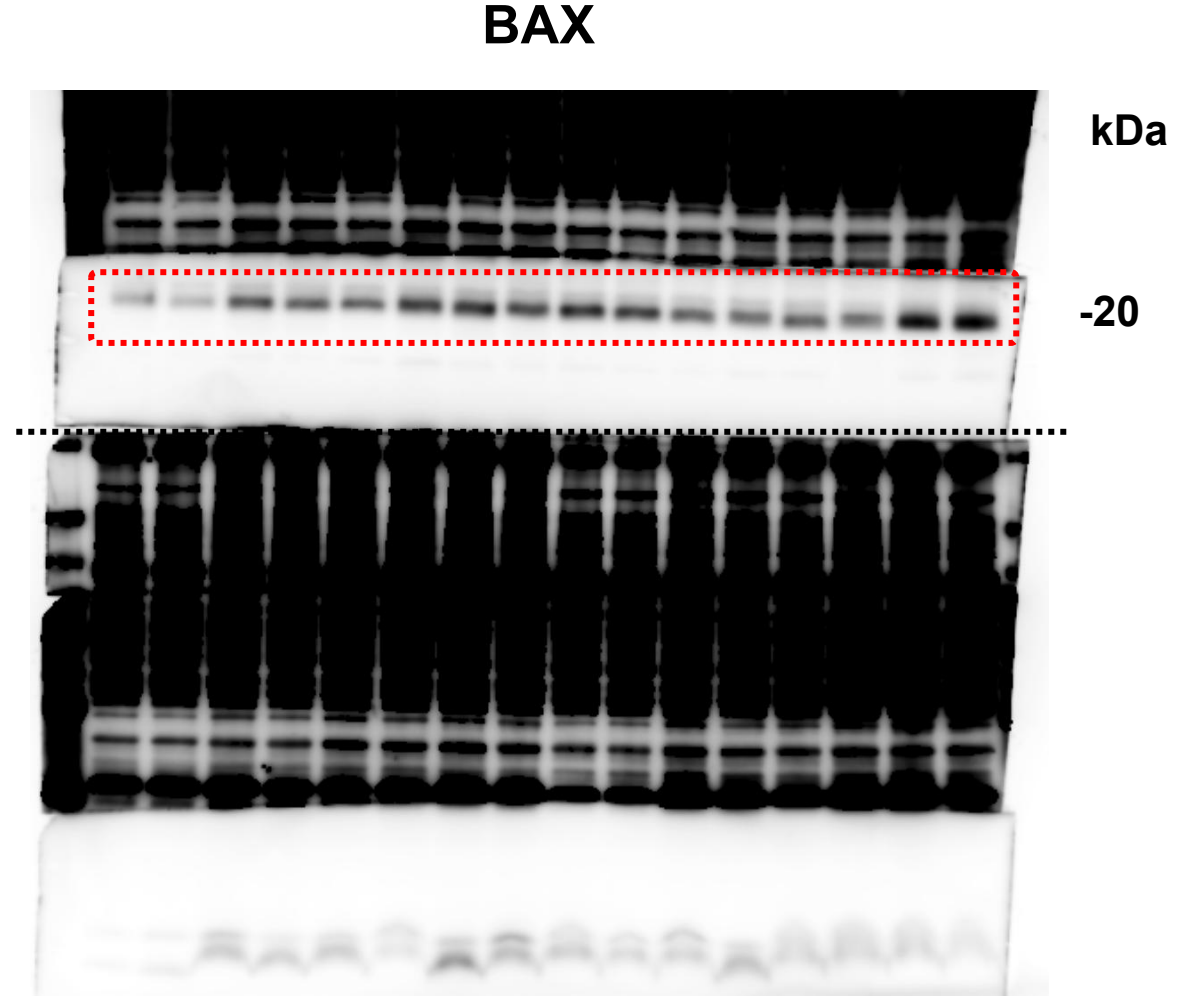

**Note: 1. Separate, noncontiguous lanes from the same samples were used for each antibody.  
2. Bands used in Figures are indicated by boxes in red outlines.**

**Fig. 6C (Cleaved-caspase-8/Caspase-8-Full unedited blot)**

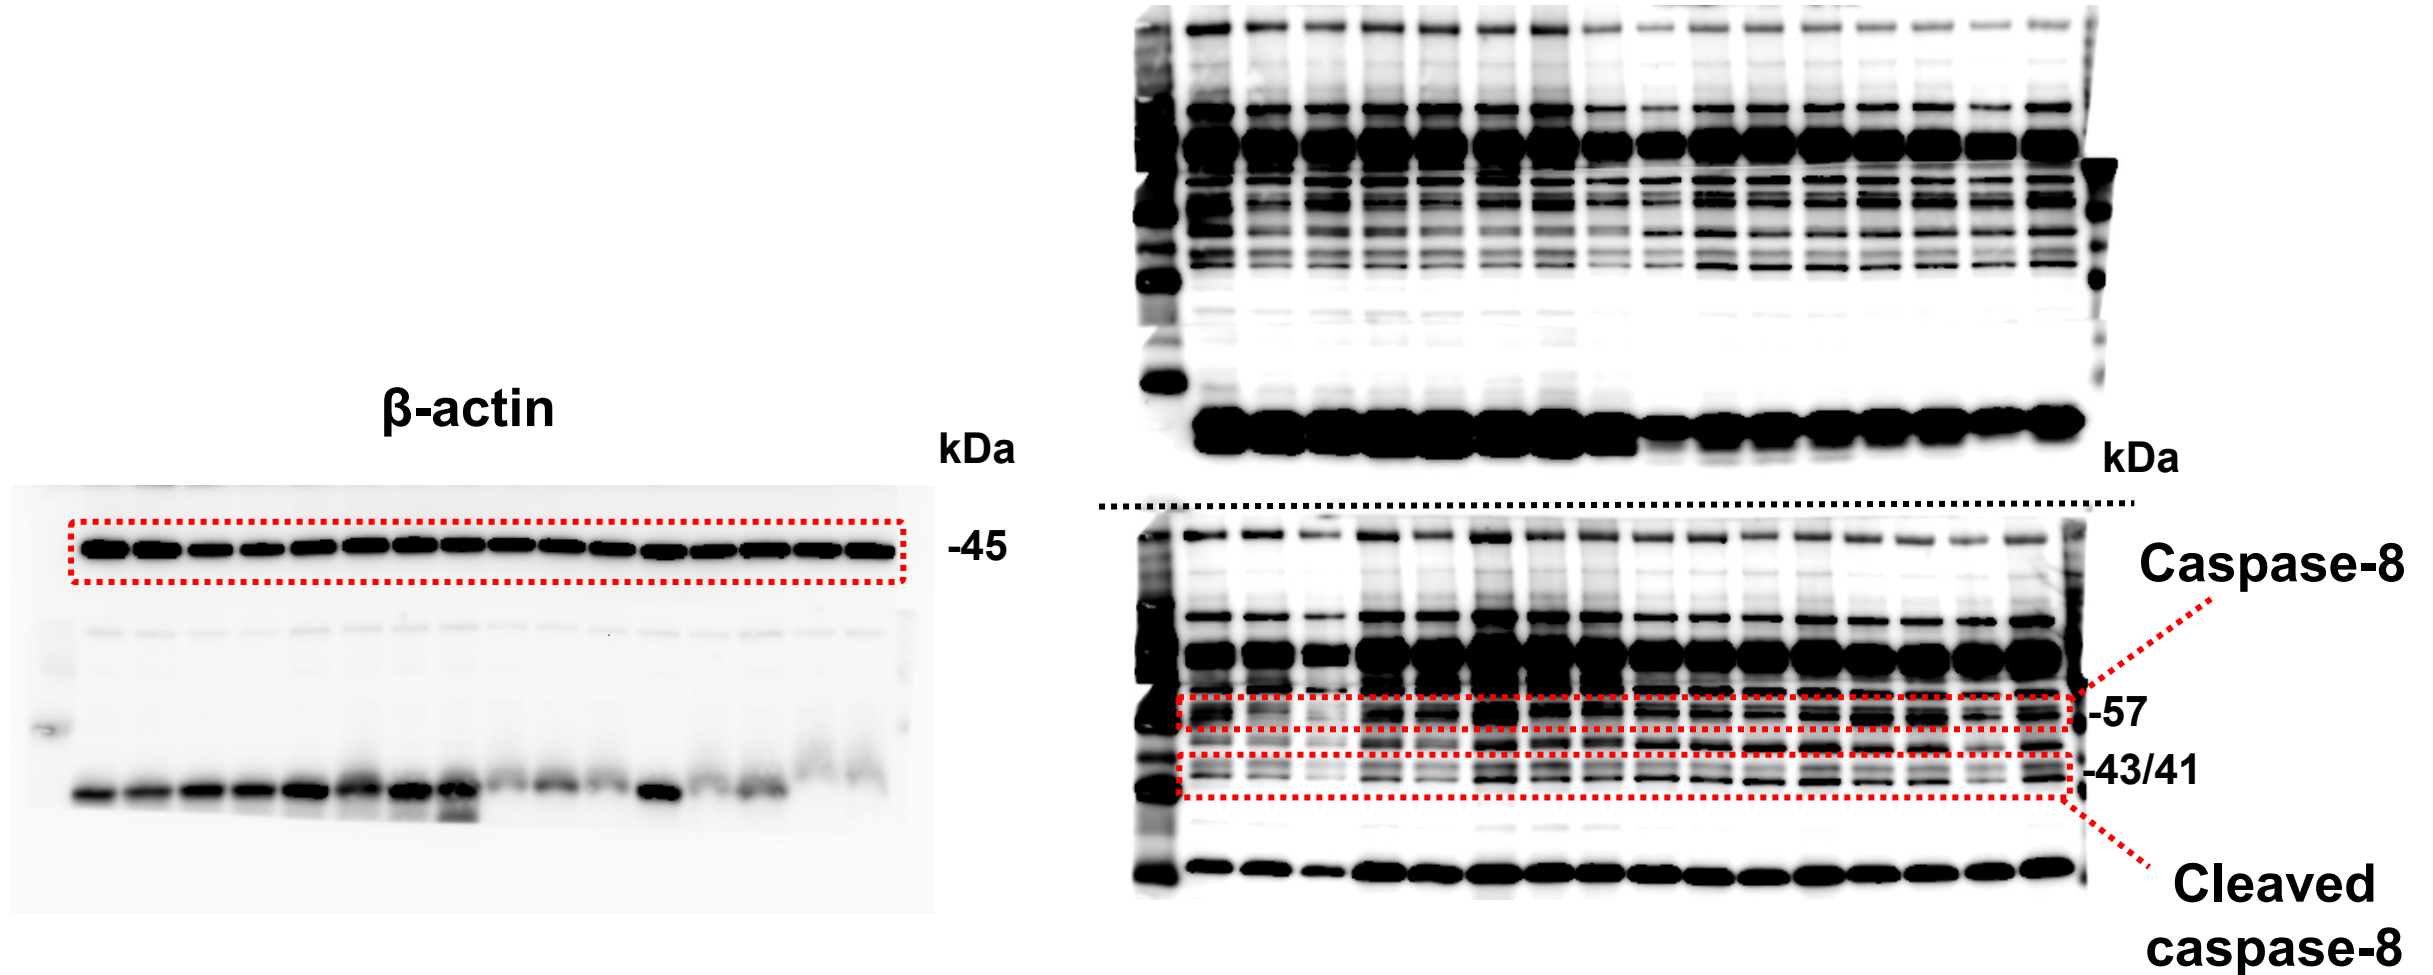

**Note: 1. In Cleaved-caspase-8 and Caspase-8 expression, the same blot was used. Between Caspase-e and  $\beta$ -actin expression, separate, noncontiguous lanes from the same samples were used for each antibody.**  
**2. Bands used in Figures are indicated by boxes in red outlines.**

**Fig. 6E (BAK-Full unedited blot)**

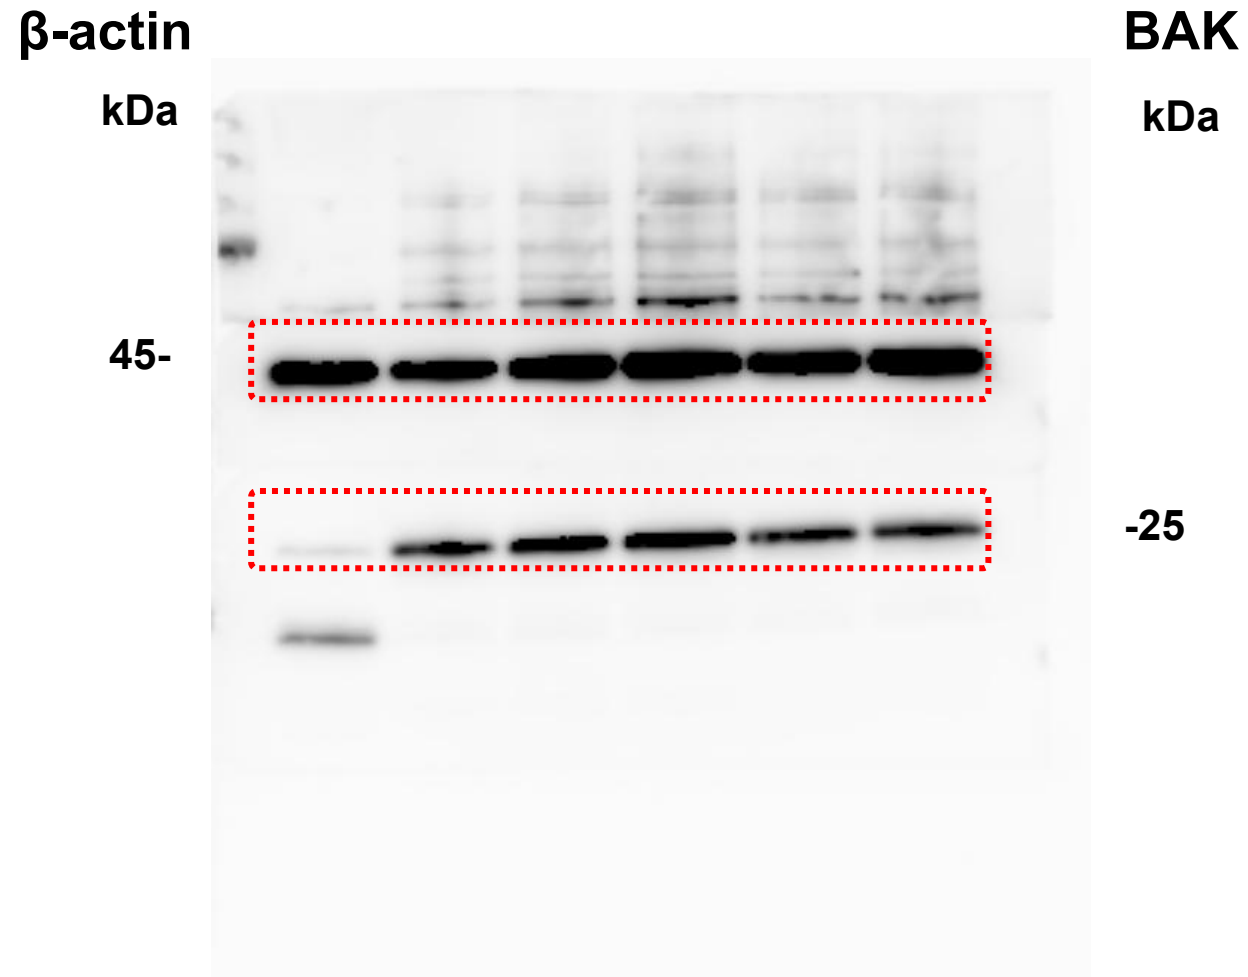

**Note: 1. The same blot was used.**

**2. Bands used in Figures are indicated by boxes in red outlines.**

**Fig. 6E (Cleaved-caspase-8/Caspase-8-Full unedited blot)**

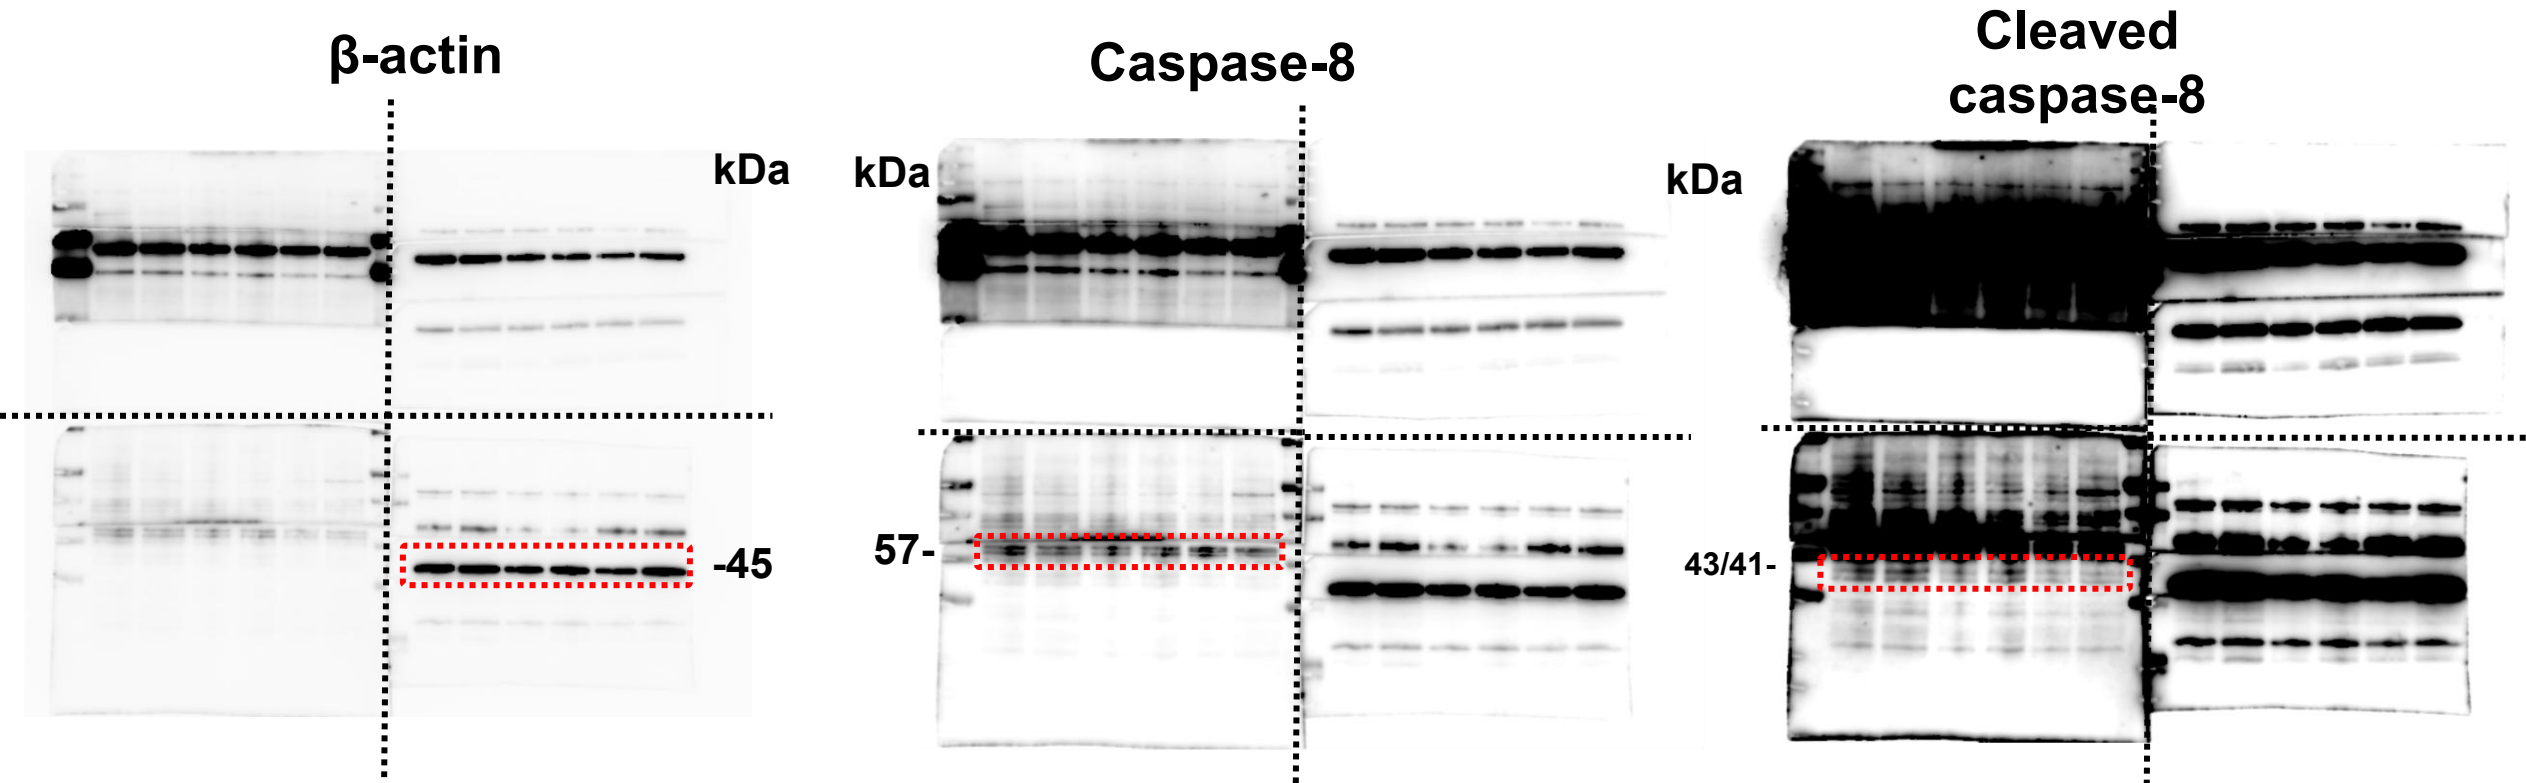

**Note: 1. In Cleaved caspase-8 and Caspase-8 expression, the same blot and different exposure times (short and long exposures shown) were used. Between Caspase-8 and  $\beta$ -actin expression, separate, noncontiguous lanes from the same samples were used for each antibody.**

**2. Bands used in Figures are indicated by boxes in red outlines.**

**Fig. 7A (p-STAT3-STAT3-Full unedited blot)**

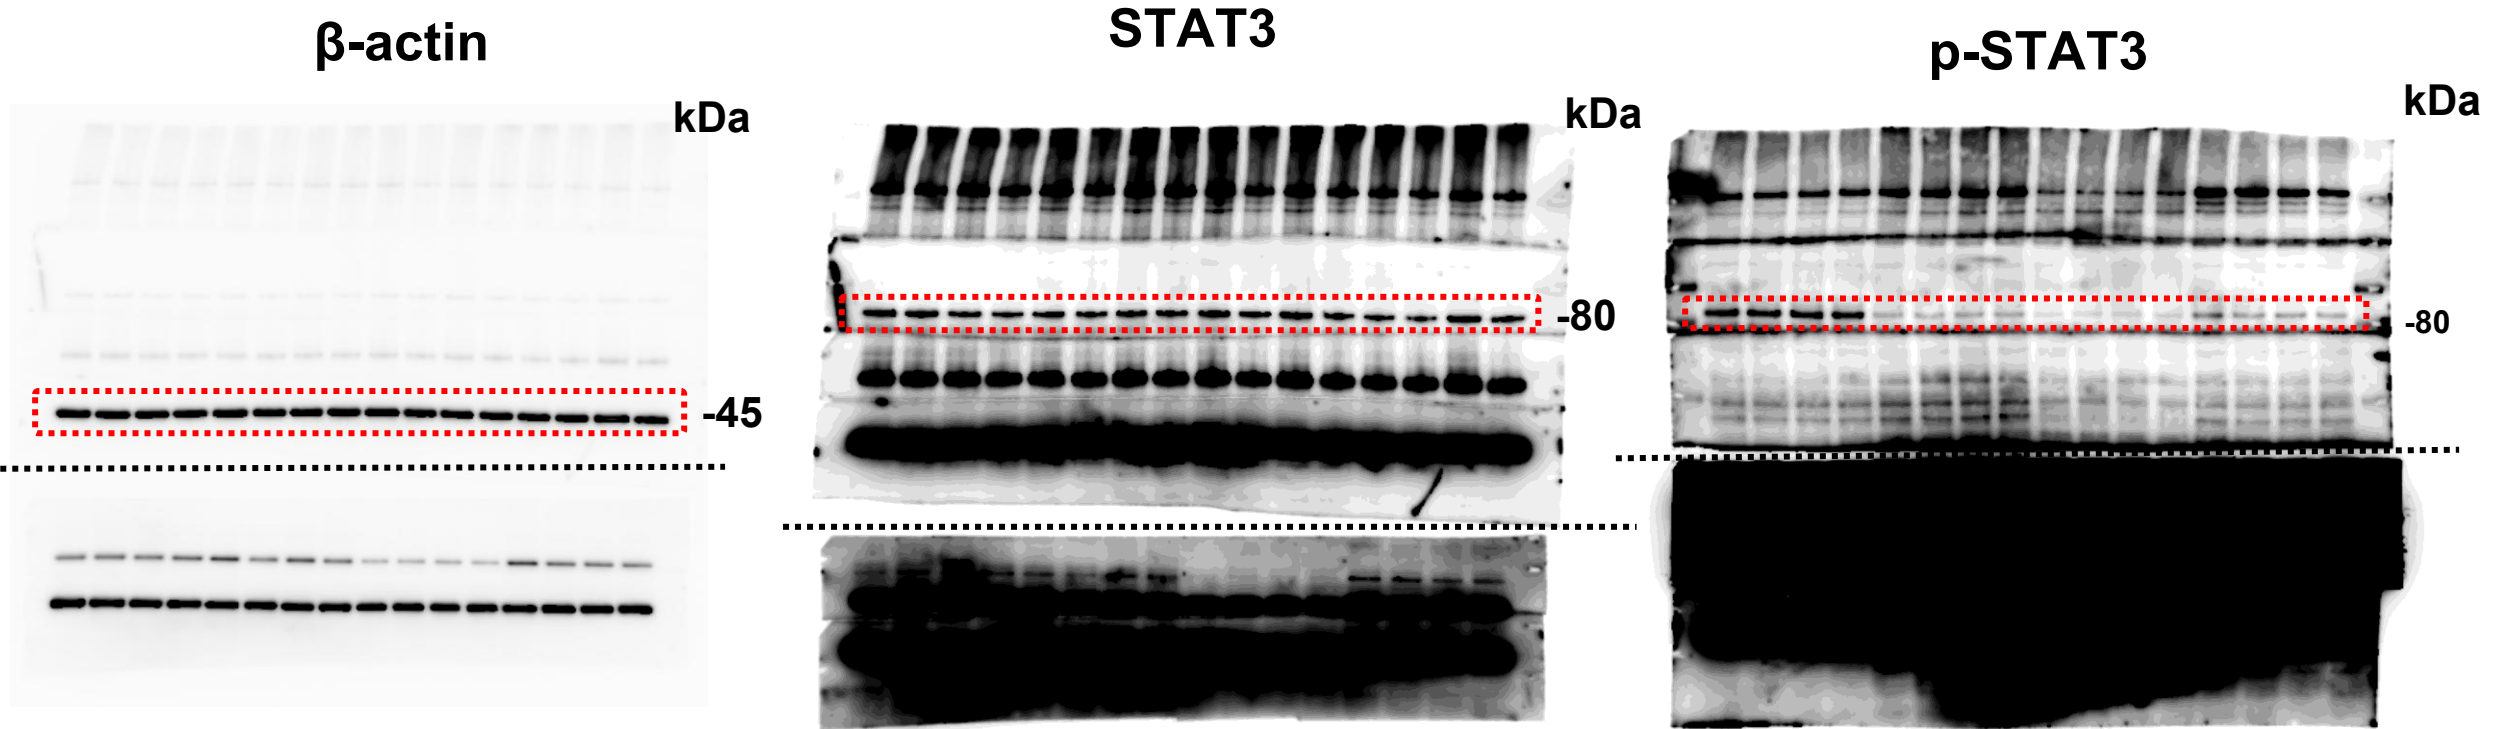

**Note: 1. In STAT3 and  $\beta$ -actin expression, the same blot and different exposure times (short and long exposures shown) were used. Between p-STAT3 and STAT3 expression, separate, noncontiguous lanes from the same samples were used for each antibody.**

**2. Bands used in Figures are indicated by boxes in red outlines.**

**Fig. 7A (p-AKT-AKT-Full unedited blot)**

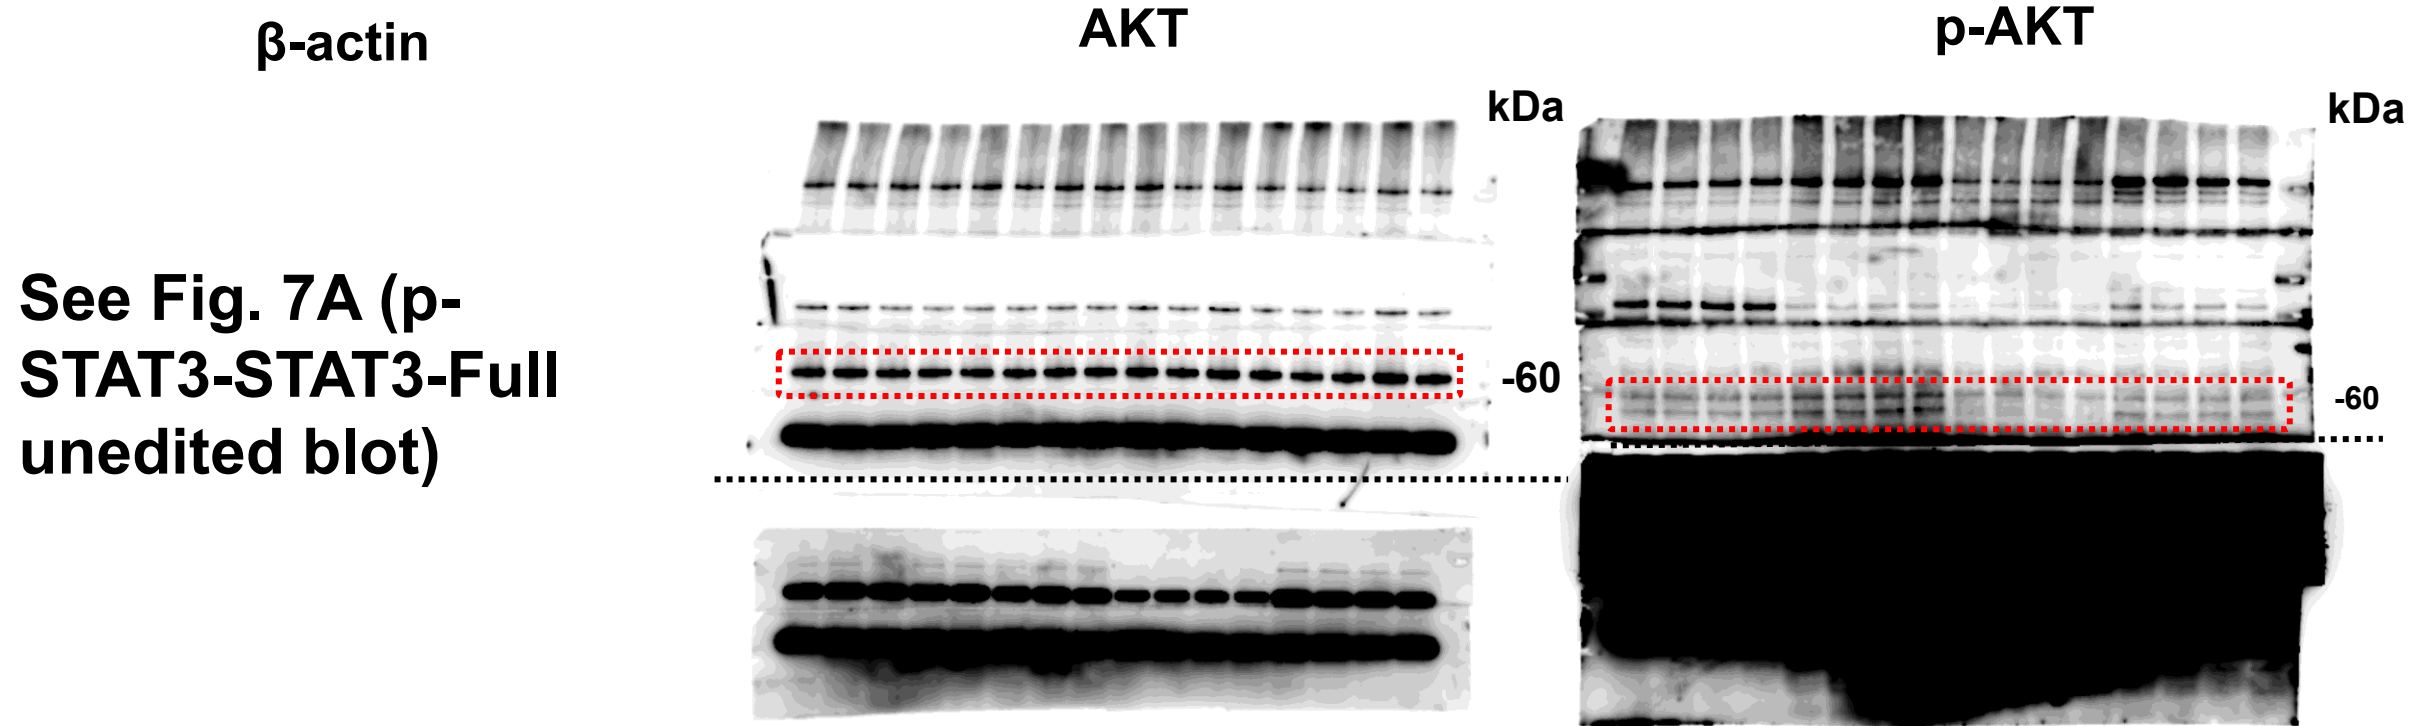

**See Fig. 7A (p-STAT3-STAT3-Full unedited blot)**

- Note: 1. In AKT and  $\beta$ -actin expression, the same blot and different exposure times (short and long exposures shown) were used. Between p-AKT and AKT expression, separate, noncontiguous lanes from the same samples were used for each antibody.**
- 2. Bands used in Figures are indicated by boxes in red outlines.**

**Fig. 7A (p-mTOR-,TOR-Full unedited blot)**

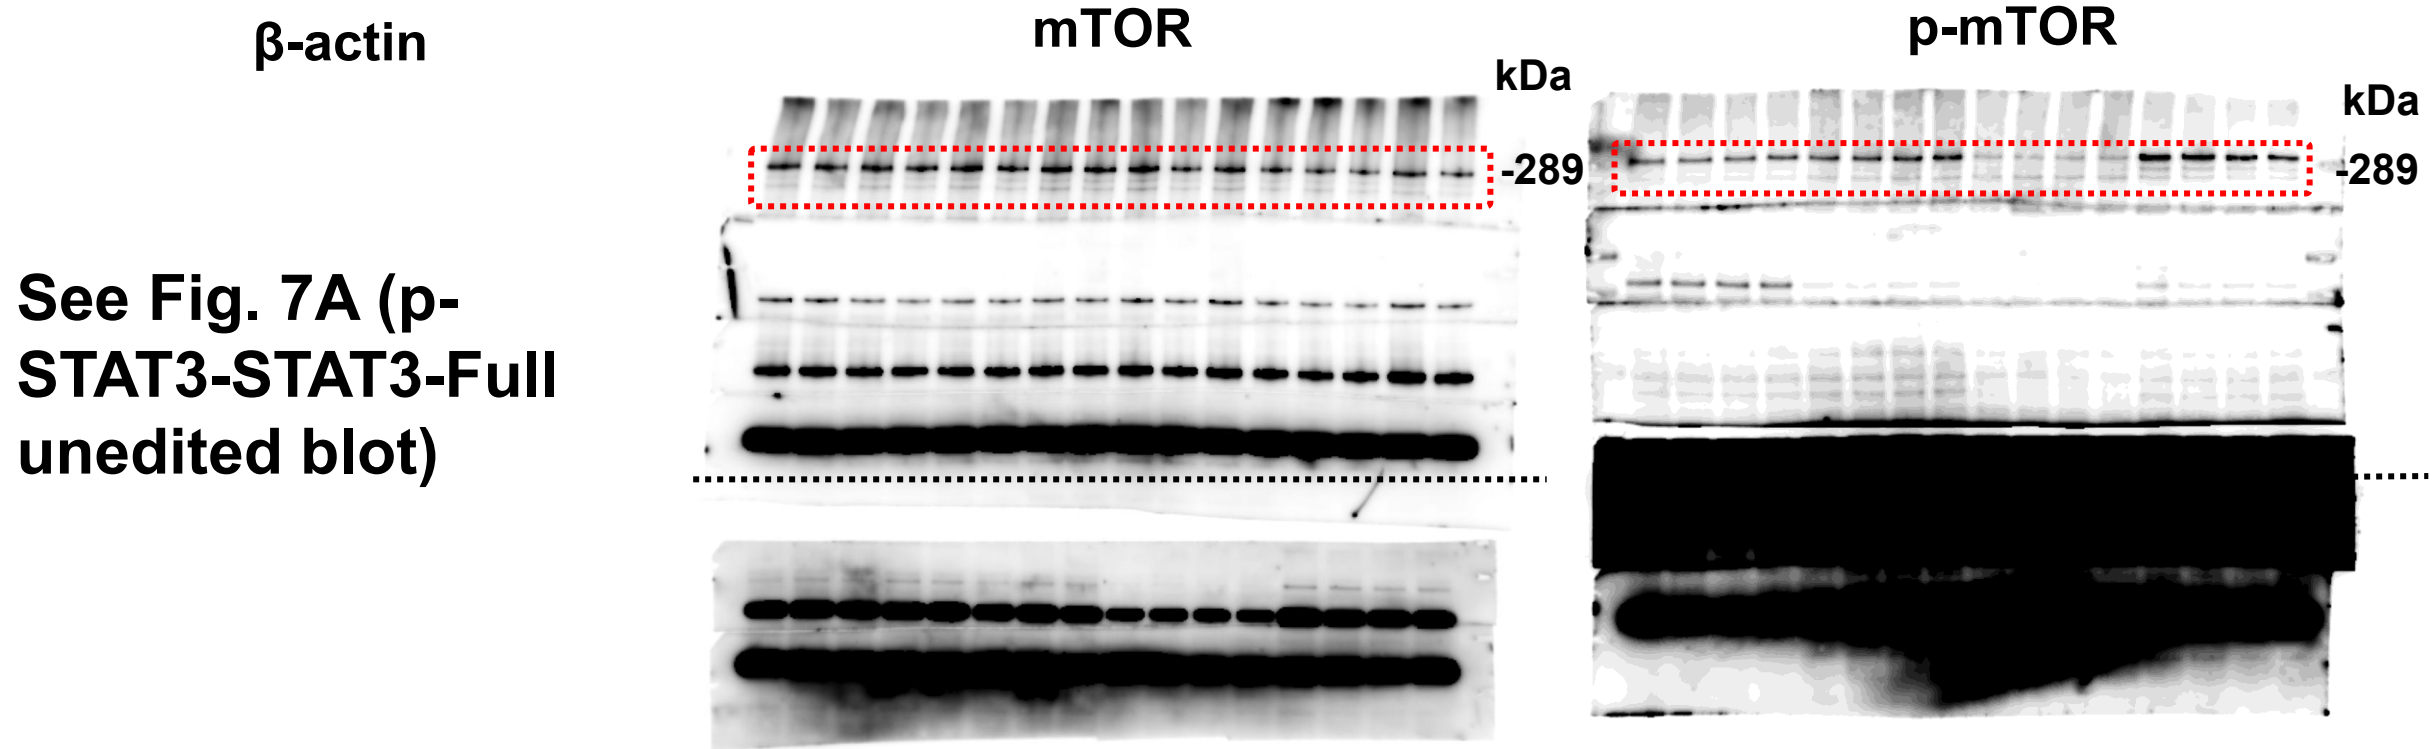

**Note: 1. In mTOR and  $\beta$ -actin expression, the same blot and different exposure times (short and long exposures shown) were used. Between p-mTOR and mTOR expression, separate, noncontiguous lanes from the same samples were used for each antibody.**

**2. Bands used in Figures are indicated by boxes in red outlines.**

**Fig. 7B (p-STAT3-STAT3-Full unedited blot)**

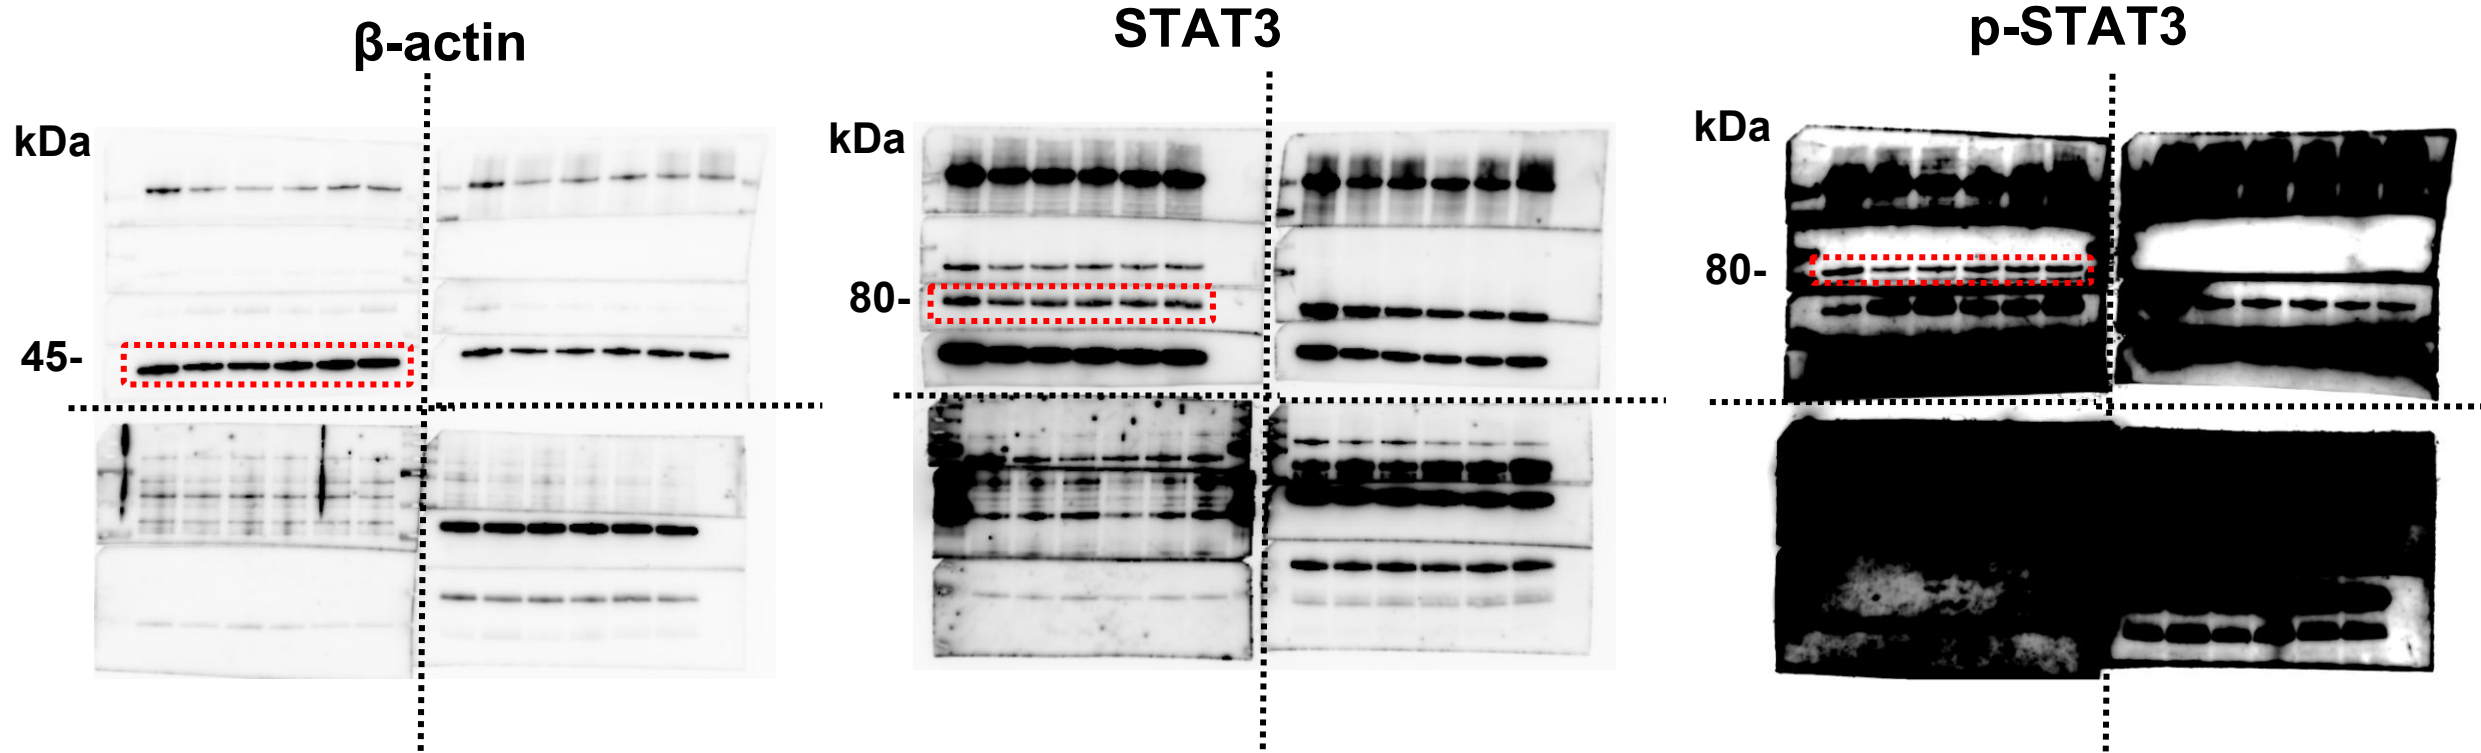

**Note: 1. In STAT3 and  $\beta$ -actin expression, the same blot and different exposure times (short and long exposures shown) were used. Between p-STAT3 and STAT3 expression, separate, noncontiguous lanes from the same samples were used for each antibody.**

**2. Bands used in Figures are indicated by boxes in red outlines.**

**Fig. 7B (p-AKT-AKT-Full unedited blot)**

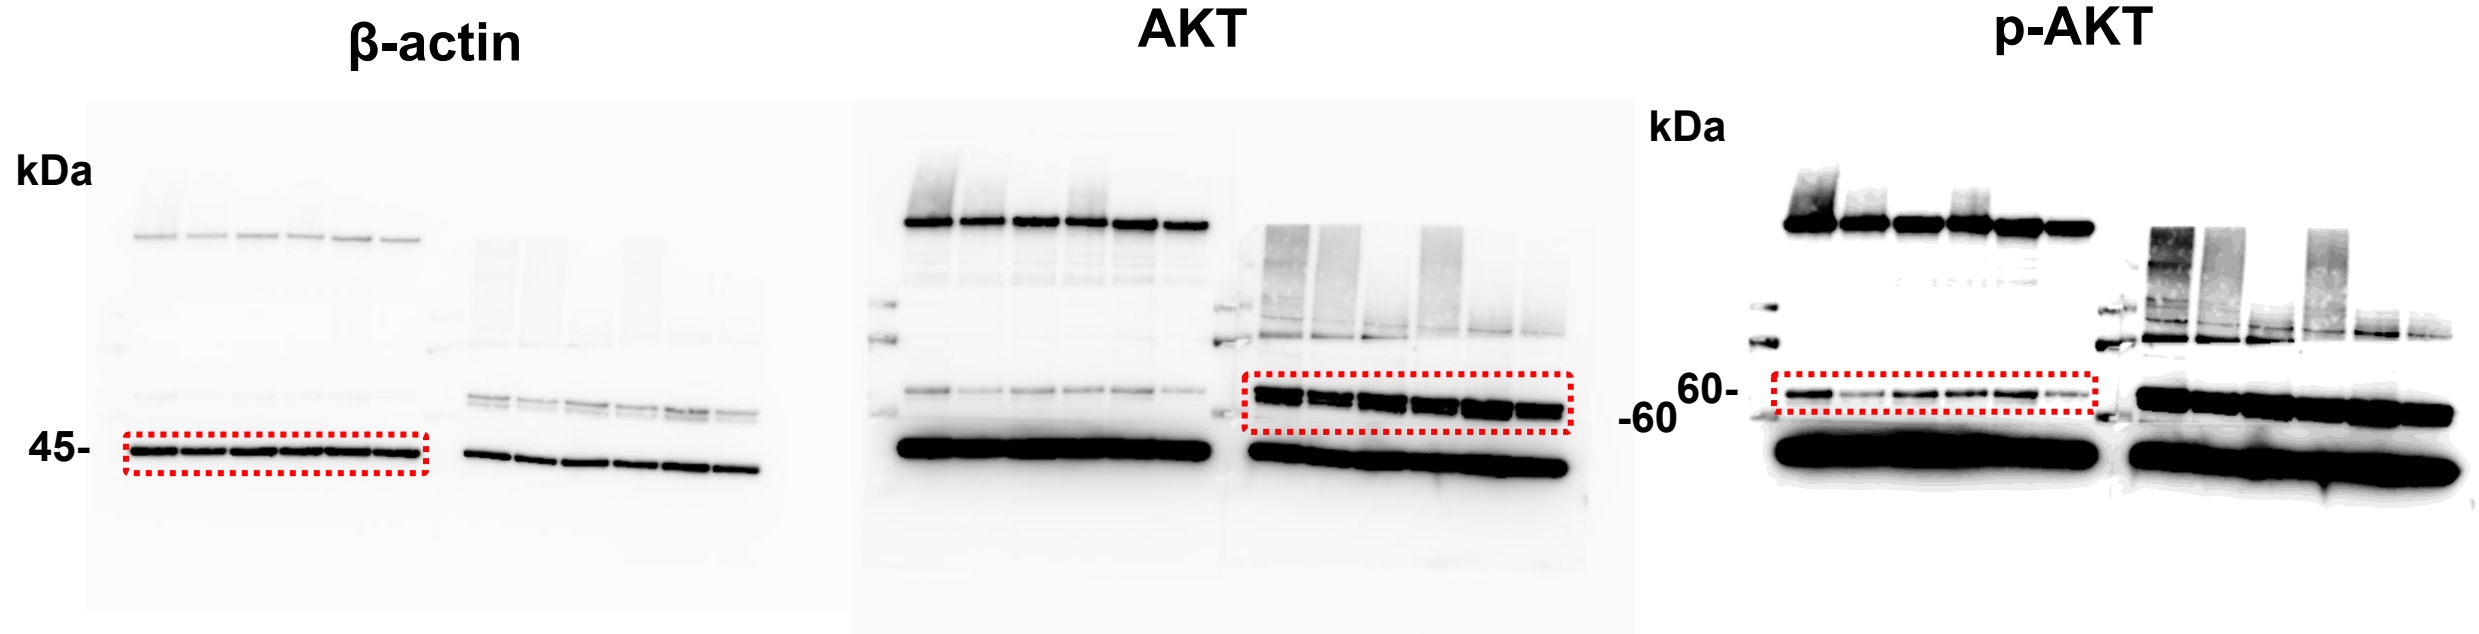

**Note: 1. The same blot and different exposure times (short and long exposures shown) were used. 2. Bands used in Figures are indicated by boxes in red outlines.**

**Fig. 7B (p-mTOR-mTOR-Full unedited blot)**

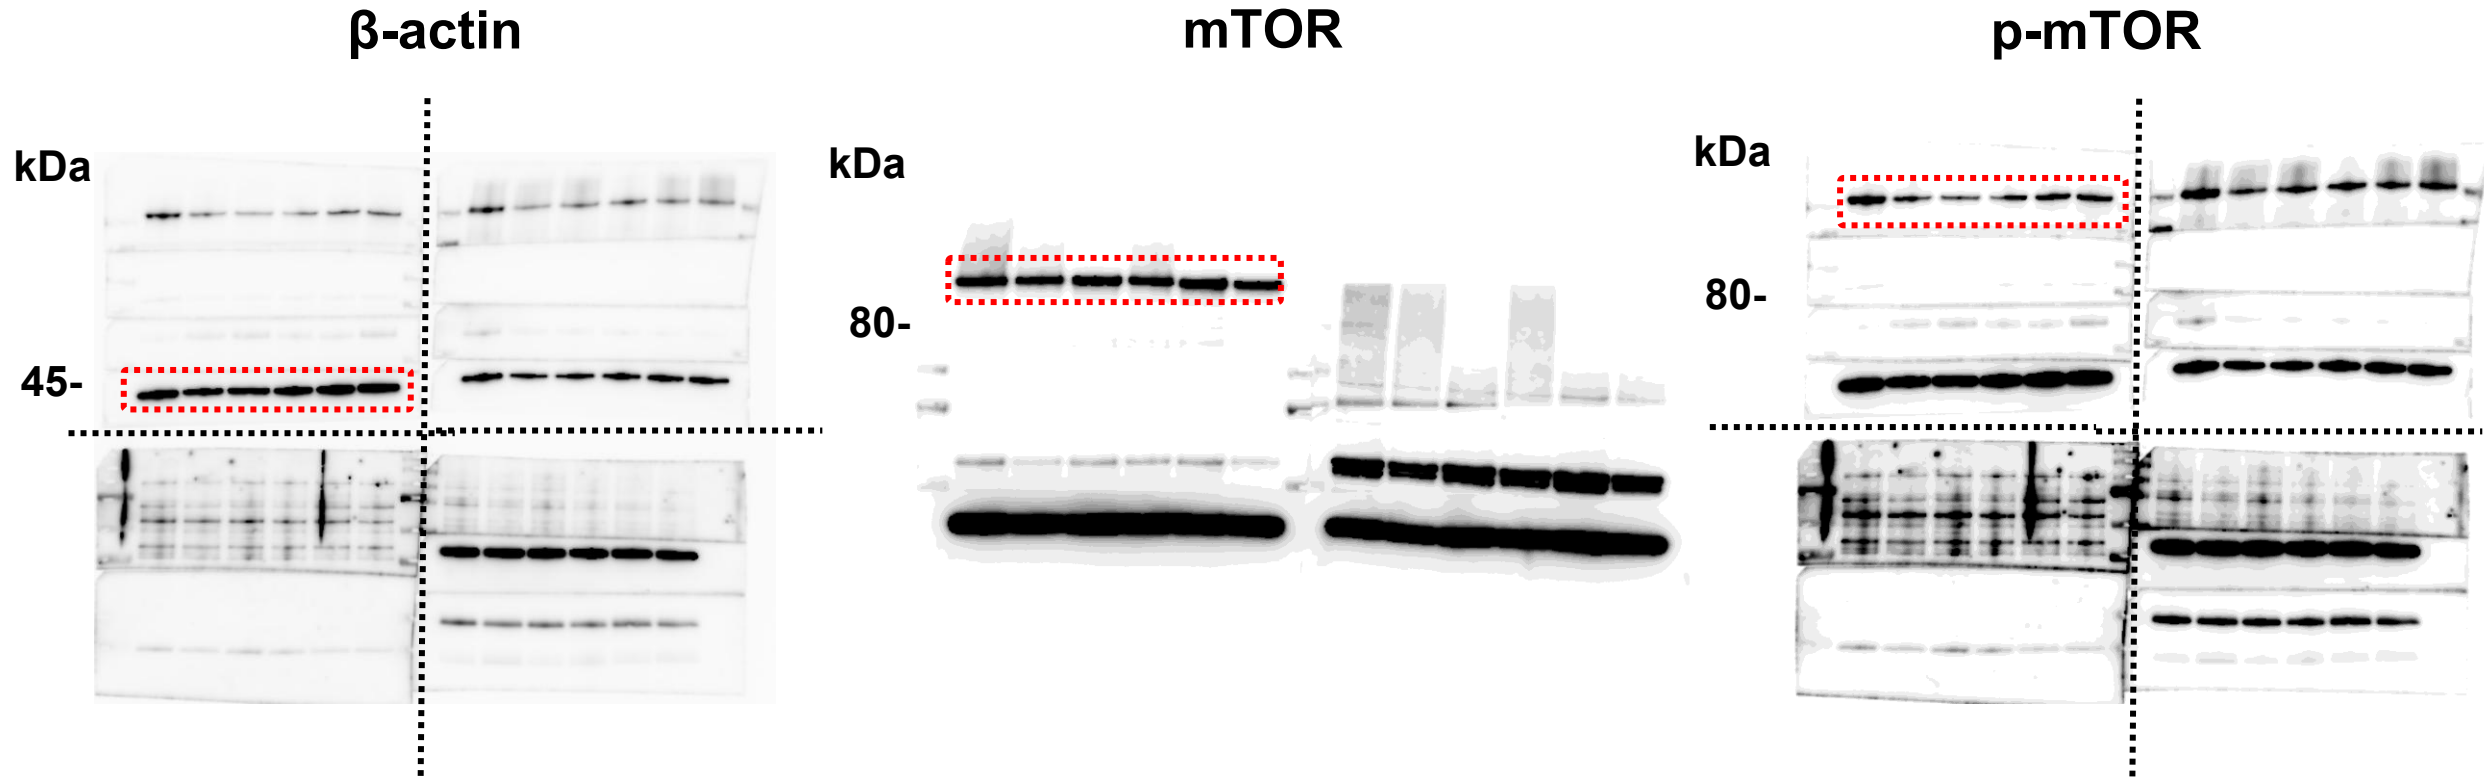

**Note: 1. In p-mTOR and  $\beta$ -actin expression, the same blot and different exposure times (short and long exposures shown) were used. Between p-mTOR and mTOR expression, separate, noncontiguous lanes from the same samples were used for each antibody.**

**2. Bands used in Figures are indicated by boxes in red outlines.**

**Fig. 7C (p-STAT3-STAT3-Full unedited blot)**

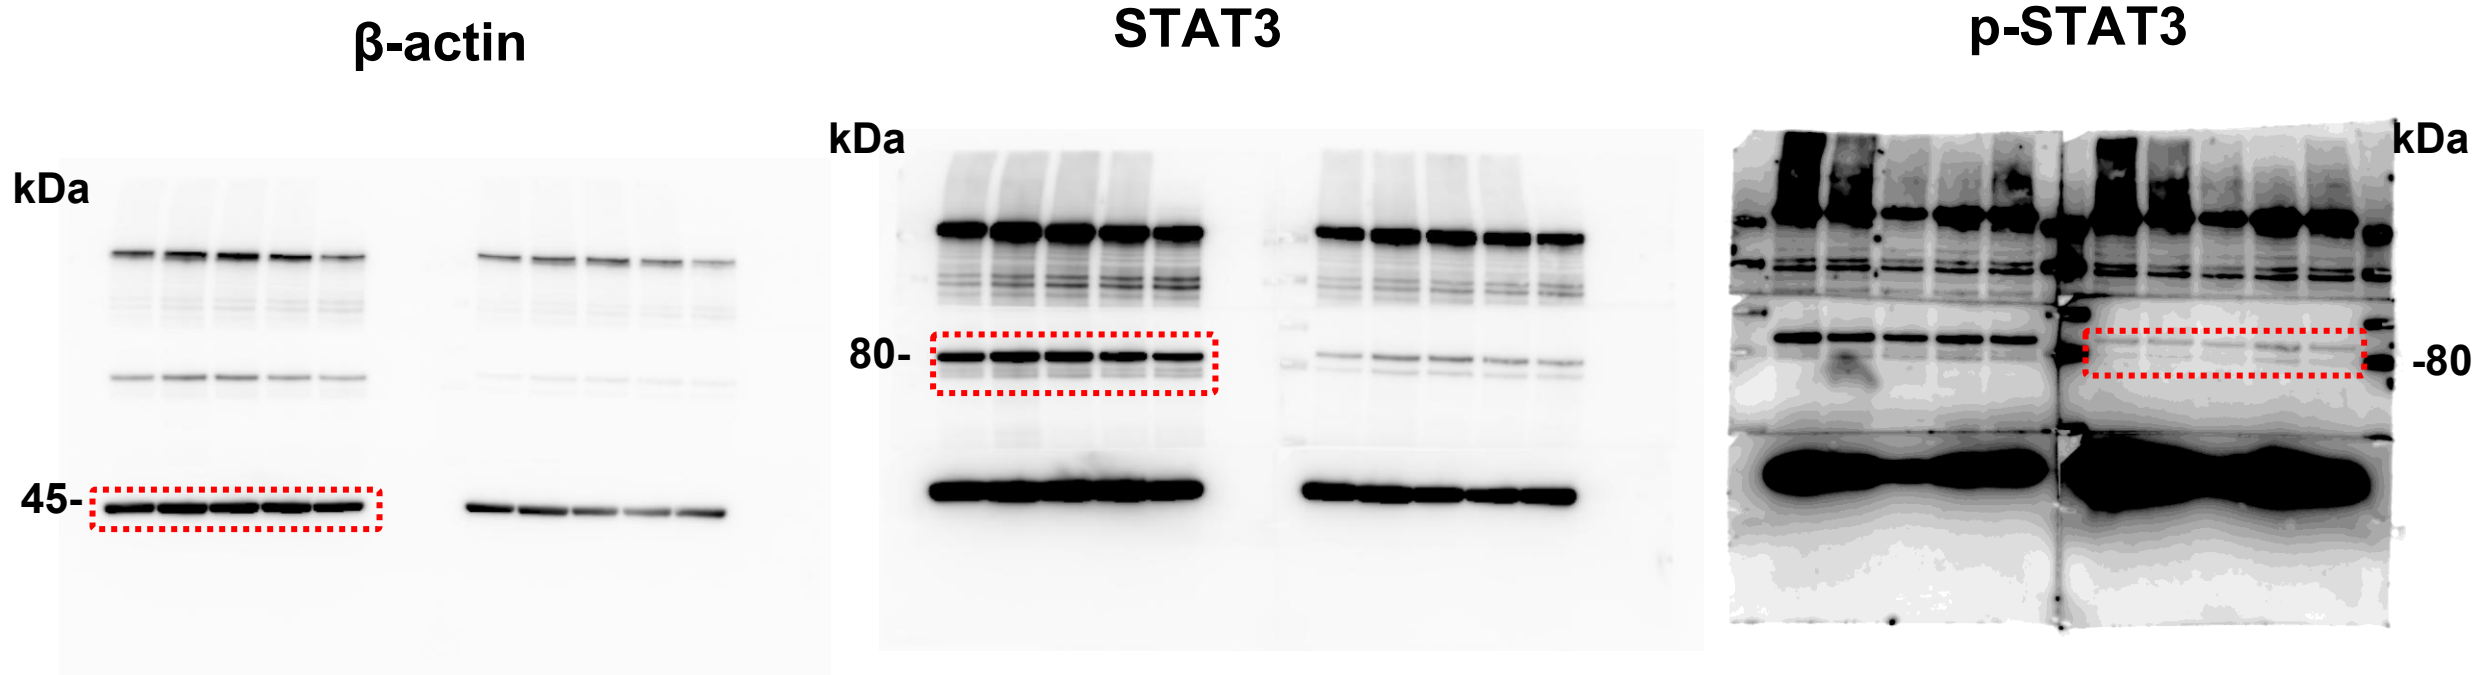

**Note: 1. In STAT3 and  $\beta$ -actin expression, the same blot and different exposure times (short and long exposures shown) were used. Between p-STAT3 and STAT3 expression, separate, noncontiguous lanes from the same samples were used for each antibody.**

**2. Bands used in Figures are indicated by boxes in red outlines.**

**Fig. 7C (p-AKT-AKT-Full unedited blot)**

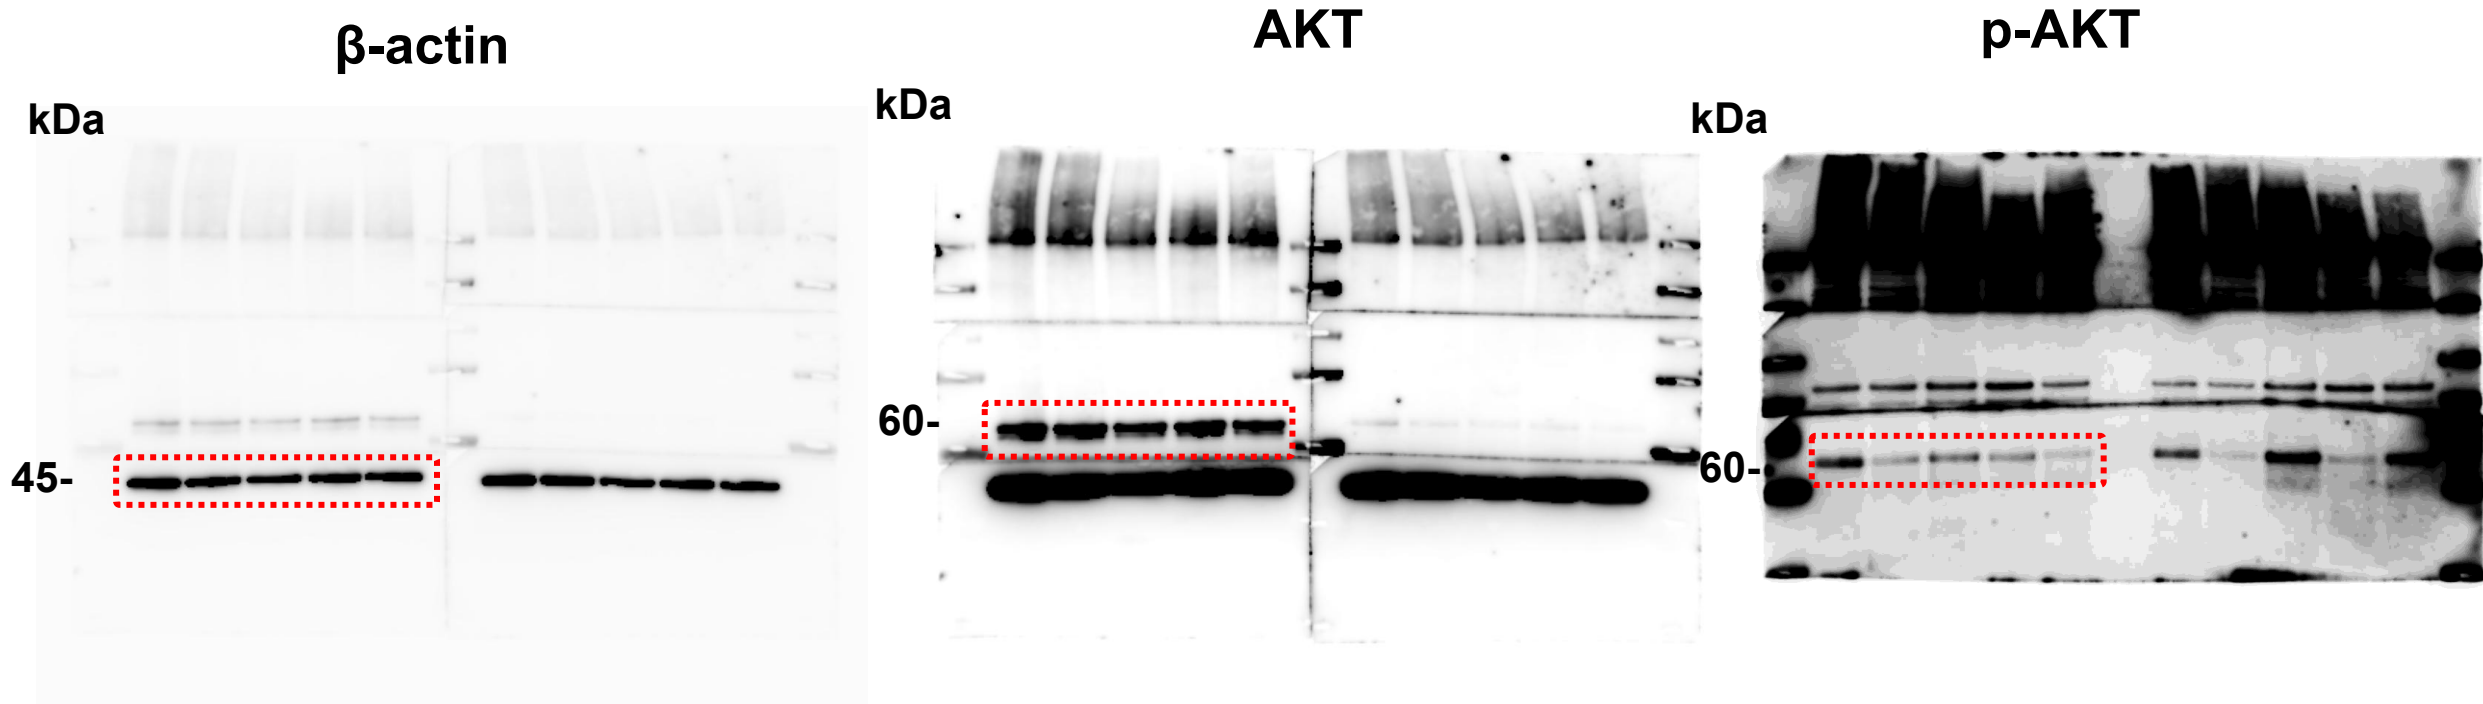

**Note: 1. In AKT and  $\beta$ -actin expression, the same blot and different exposure times (short and long exposures shown) were used. Between p-AKT and AKT expression, separate, noncontiguous lanes from the same samples were used for each antibody.**

**2. Bands used in Figures are indicated by boxes in red outlines.**

**Fig. 7C (p-mTOR-mTOR-Full unedited blot)**

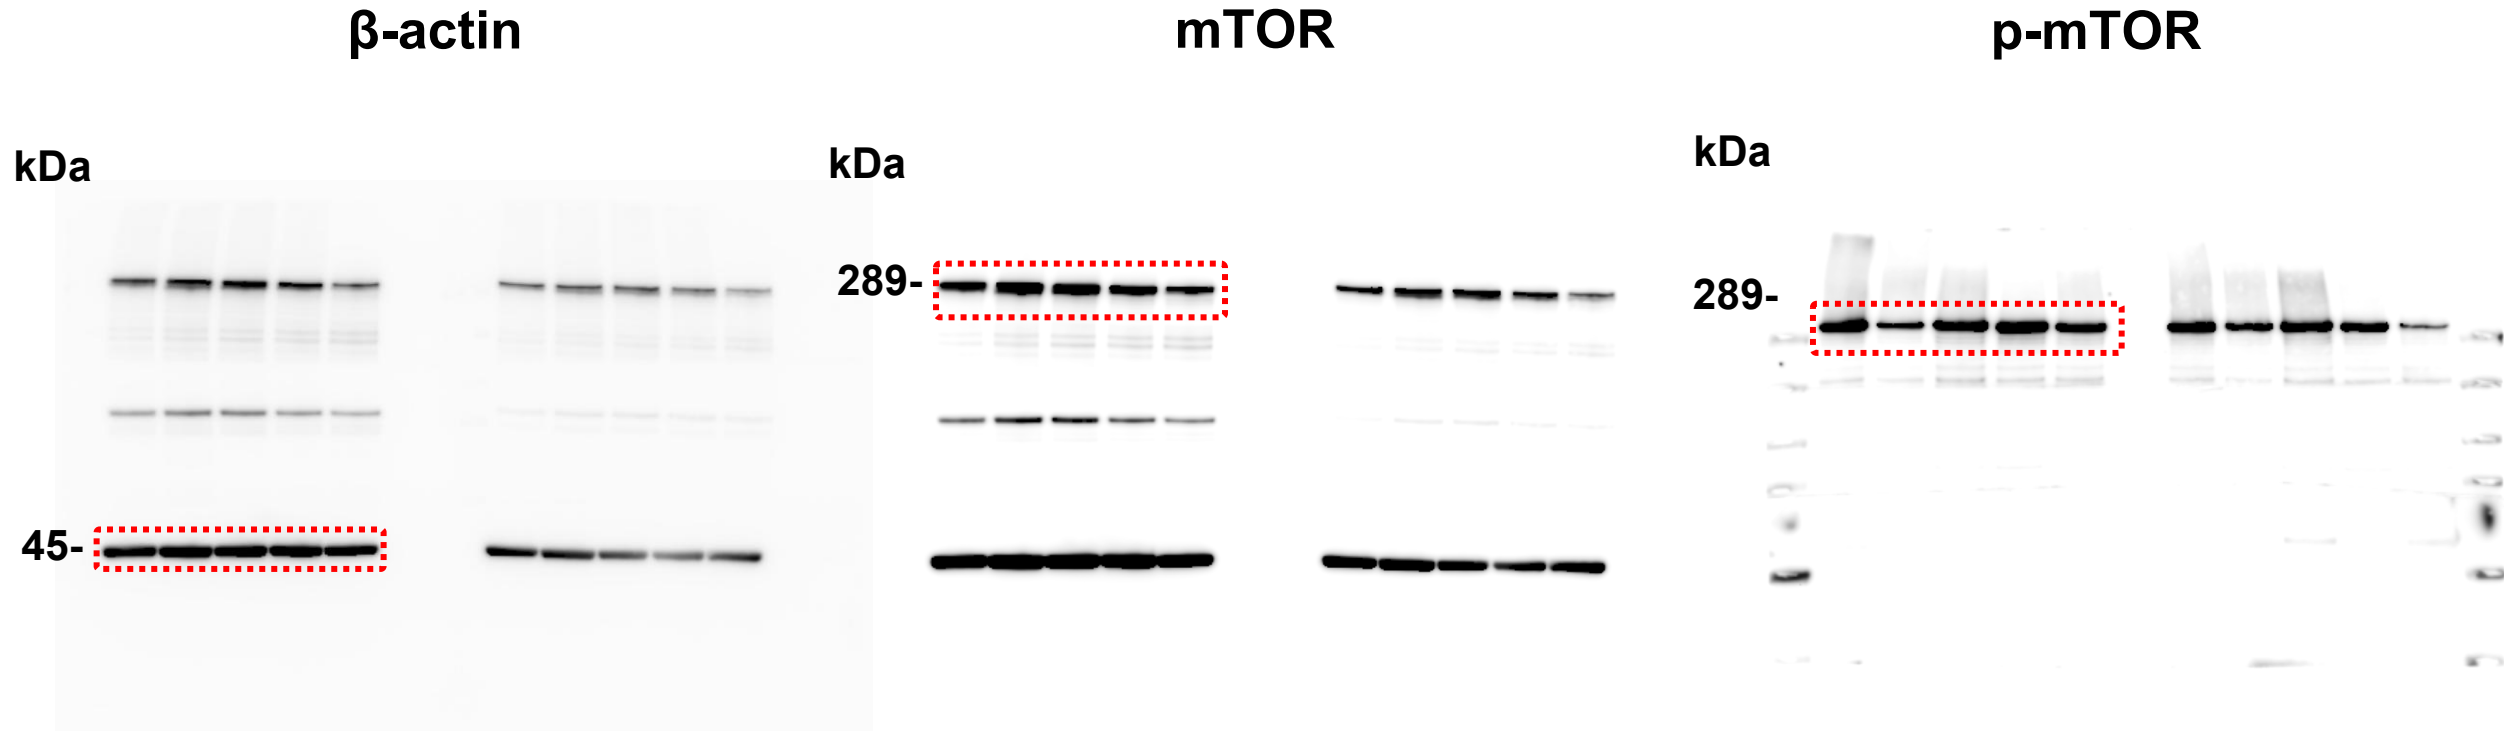

**Note: 1. In p-mTOR and  $\beta$ -actin expression, the same blot and different exposure times (short and long exposures shown) were used. Between p-mTOR and mTOR expression, separate, noncontiguous lanes from the same samples were used for each antibody.**

**2. Bands used in Figures are indicated by boxes in red outlines.**

**Fig. 7D (p-AKT-AKT-Full unedited blot)**

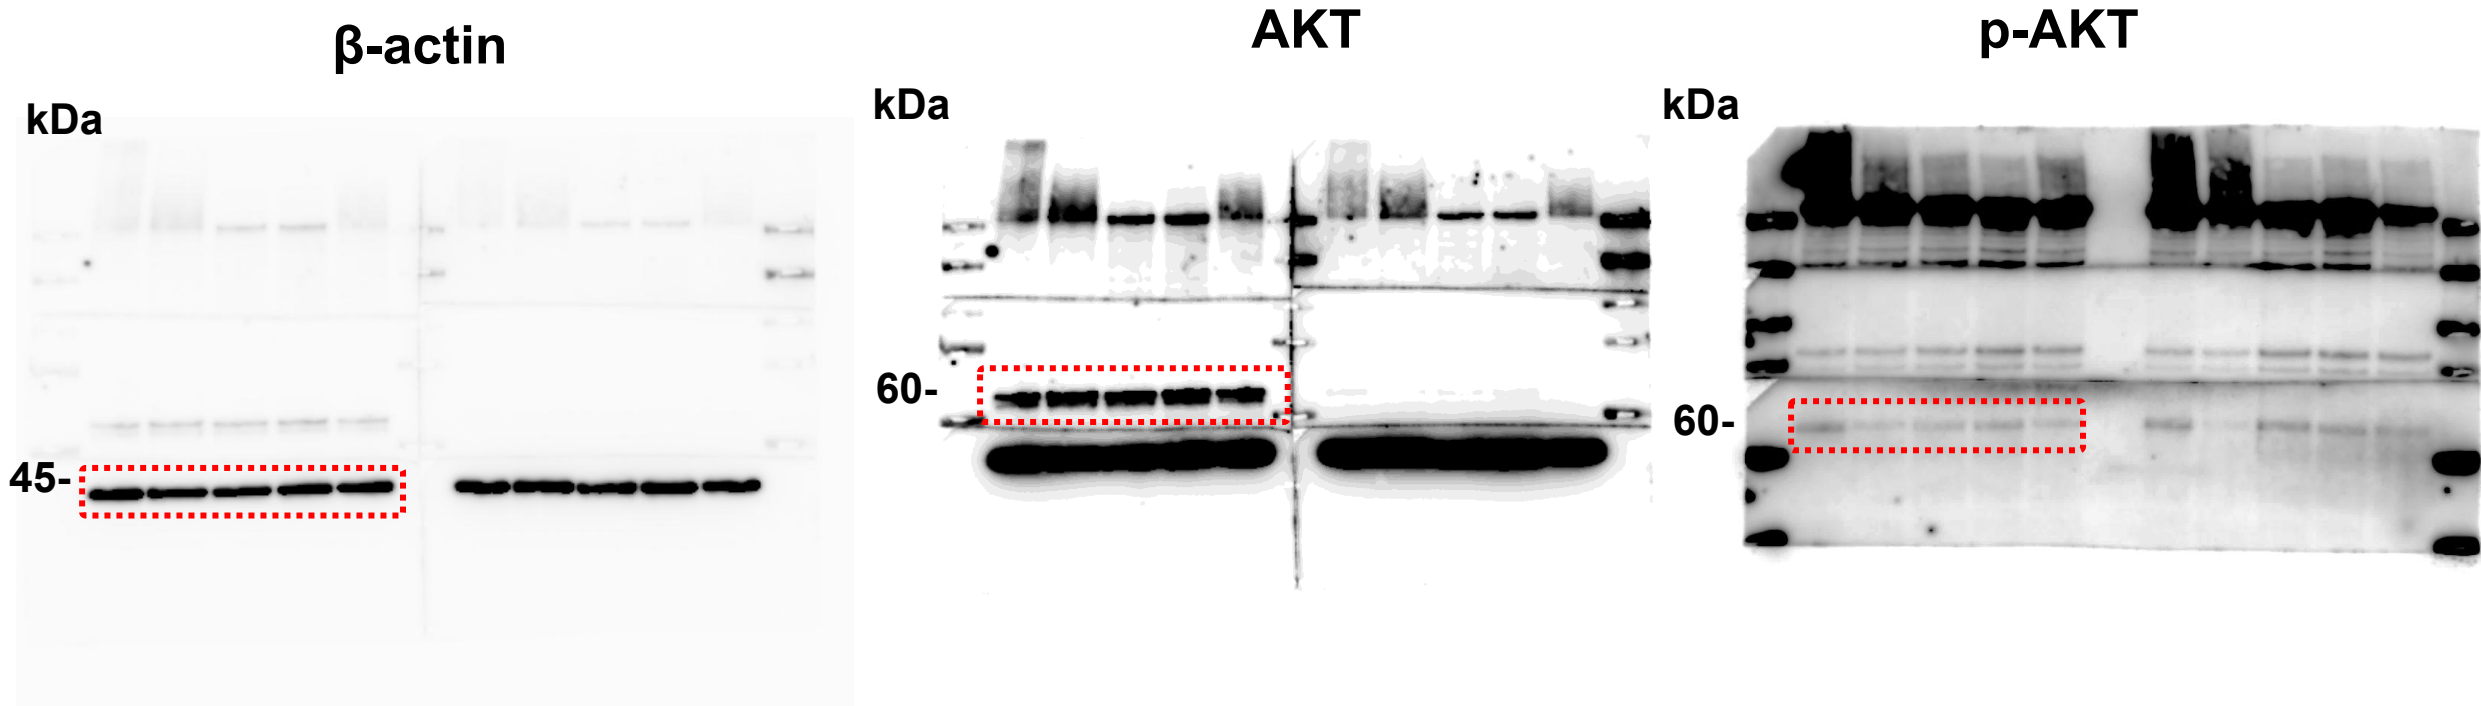

**Note: 1. In AKT and  $\beta$ -actin expression, the same blot and different exposure times (short and long exposures shown) were used. Between p-AKT and AKT expression, separate, noncontiguous lanes from the same samples were used for each antibody.**

**2. Bands used in Figures are indicated by boxes in red outlines.**

**Fig. 7D (p-mTOR-mTOR-Full unedited blot)**

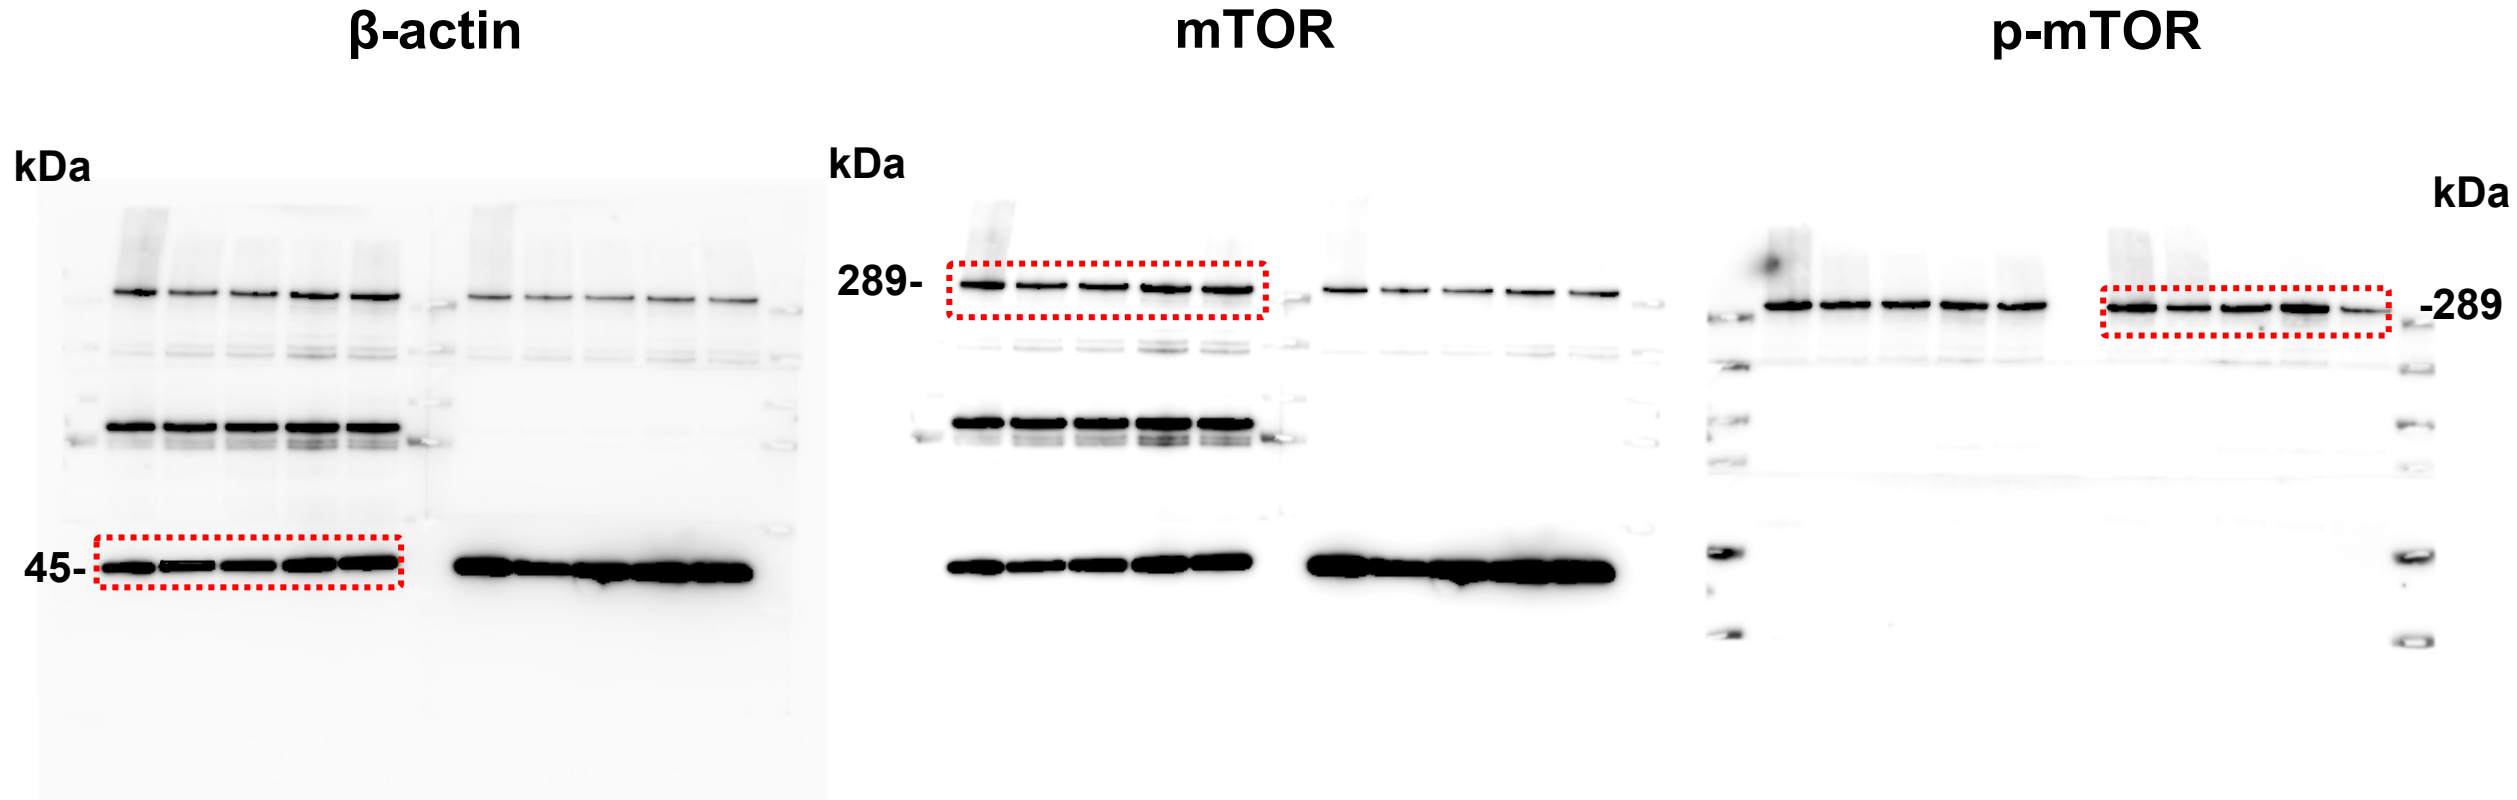

**Note: 1. In p-mTOR and  $\beta$ -actin expression, the same blot and different exposure times (short and long exposures shown) were used. Between p-mTOR and mTOR expression, separate, noncontiguous lanes from the same samples were used for each antibody.**

**2. Bands used in Figures are indicated by boxes in red outlines.**

**Fig. 7E (p-STAT3-STAT3-Full unedited blot)**

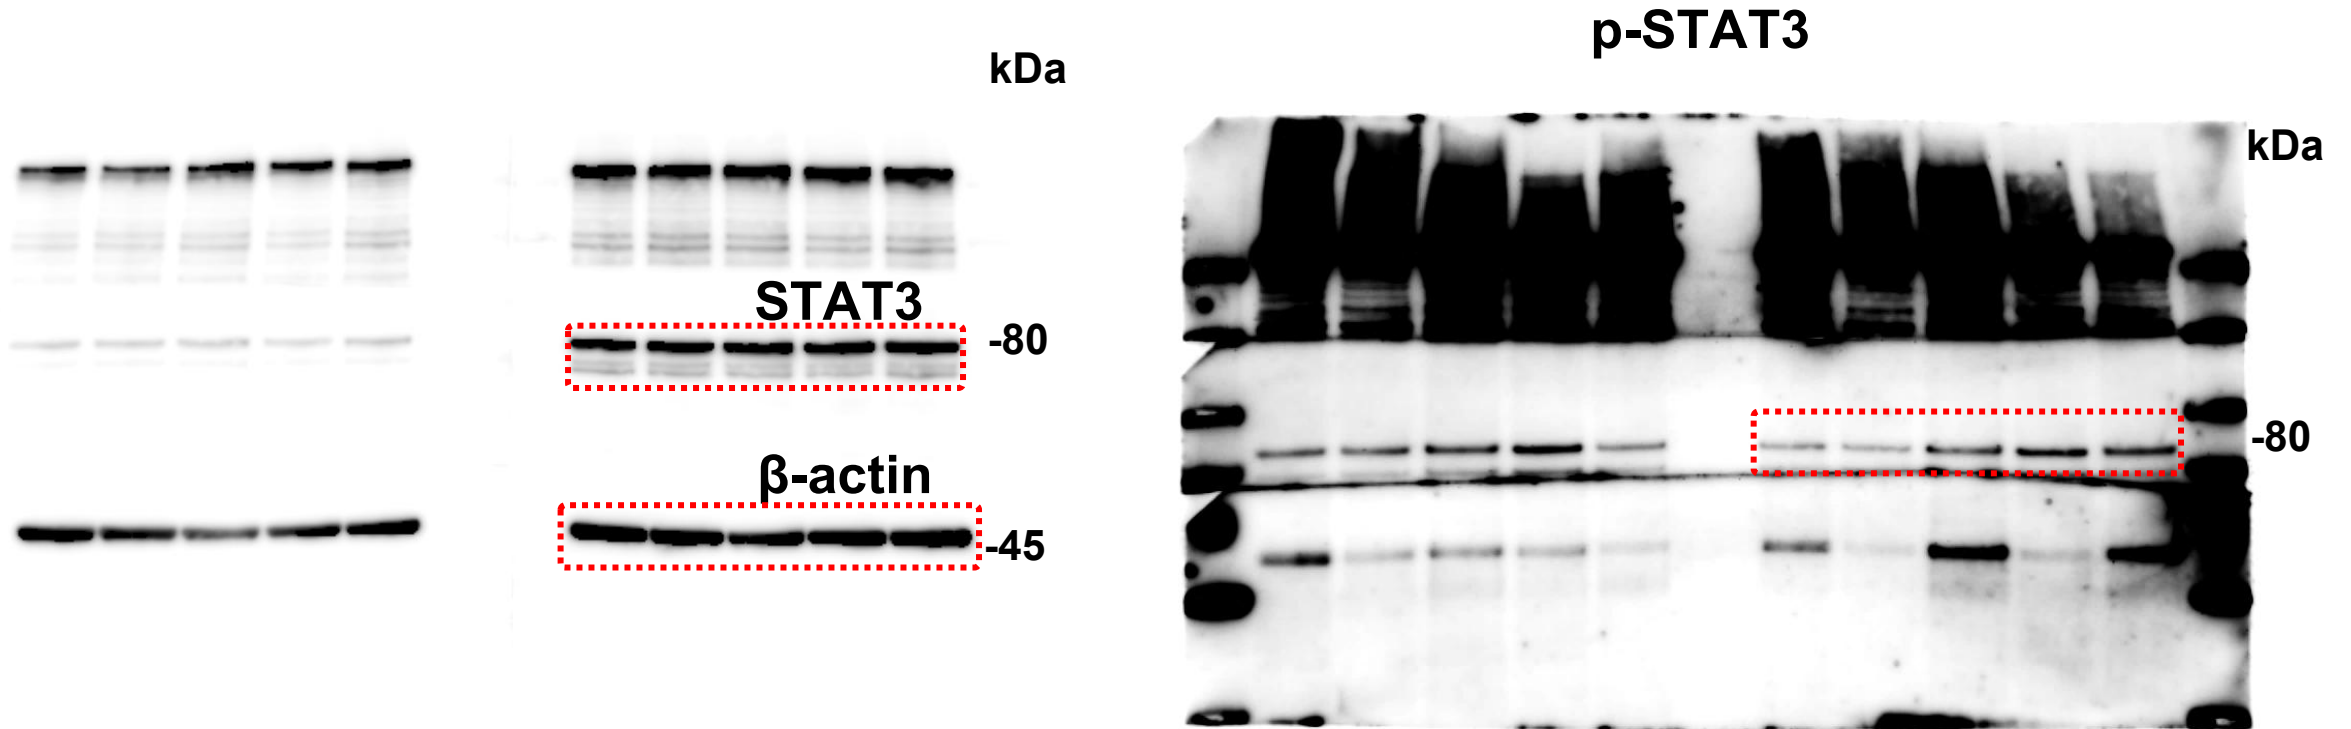

**Note: 1. In STAT3 and  $\beta$ -actin expression, the same blot was used. Between p-STAT3 and STAT3 expression, separate, noncontiguous lanes from the same samples were used for each antibody.**

**2. Bands used in Figures are indicated by boxes in red outlines.**

**Fig. 7E (p-mTOR-mTOR-Full unedited blot)**

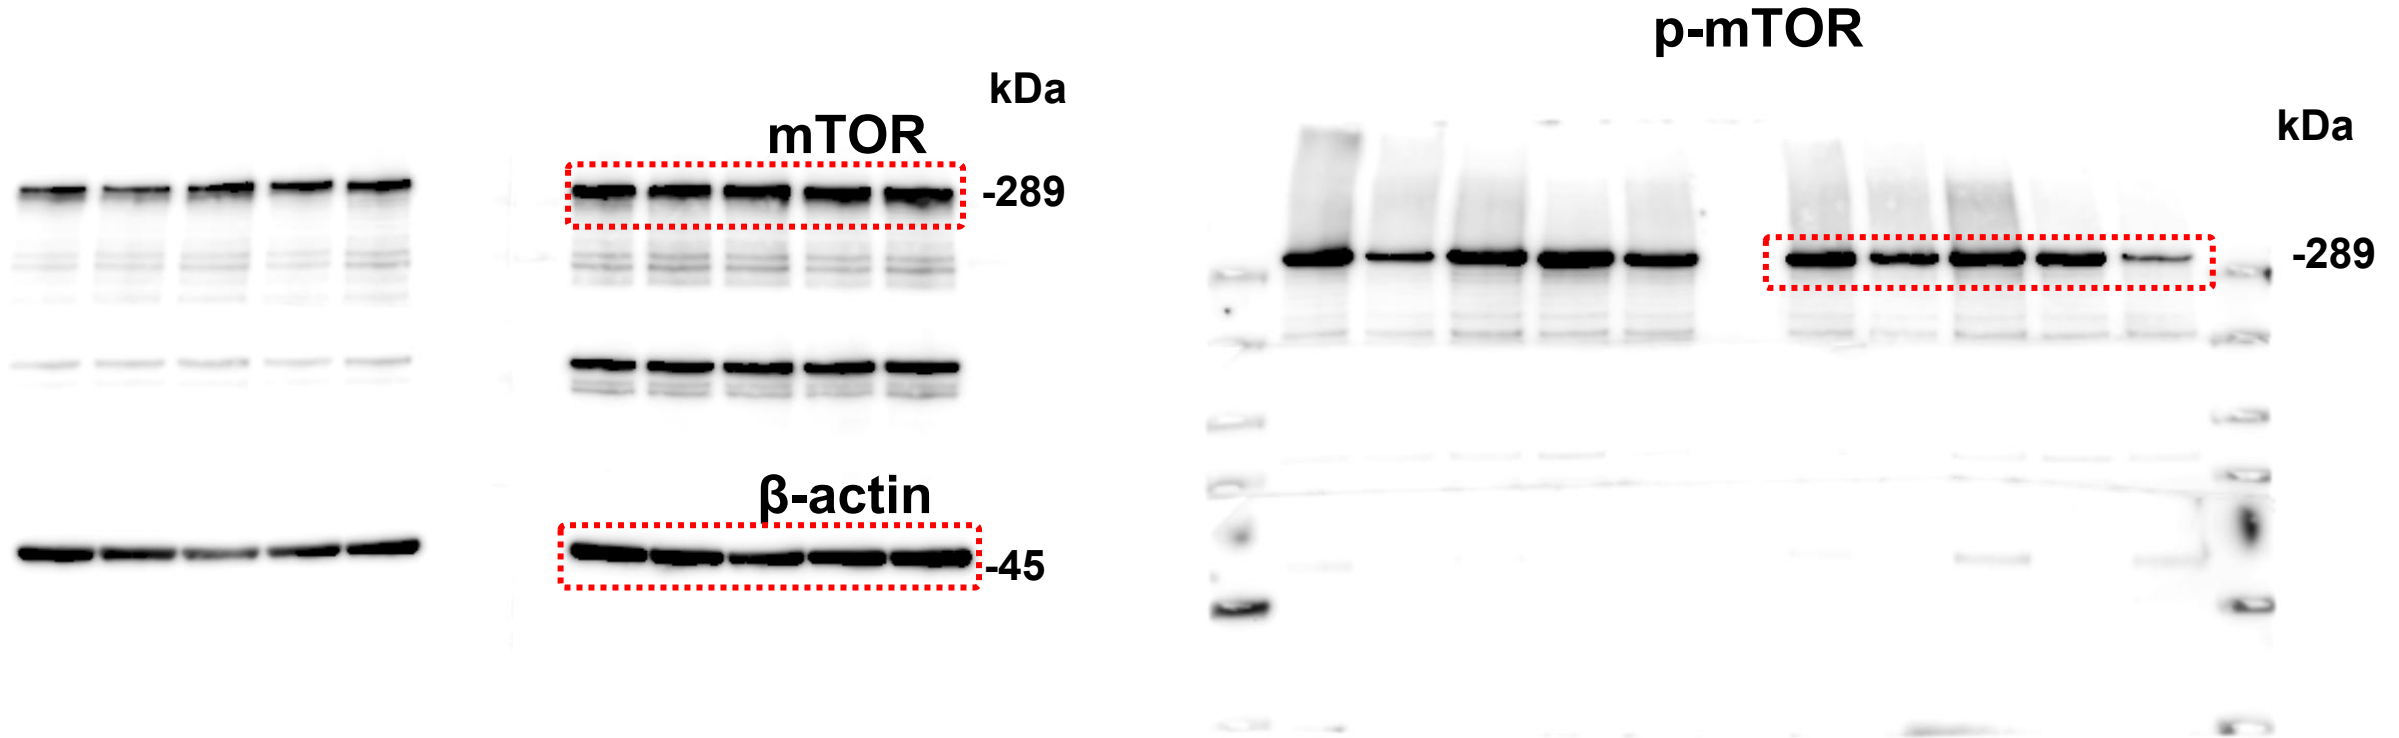

**Note: 1. In p-mTOR and  $\beta$ -actin expression, the same blot was used. Between p-mTOR and mTOR expression, separate, noncontiguous lanes from the same samples were used for each antibody.**  
**2. Bands used in Figures are indicated by boxes in red outlines.**

**Fig. 7F (p-STAT3-STAT3-Full unedited blot)**

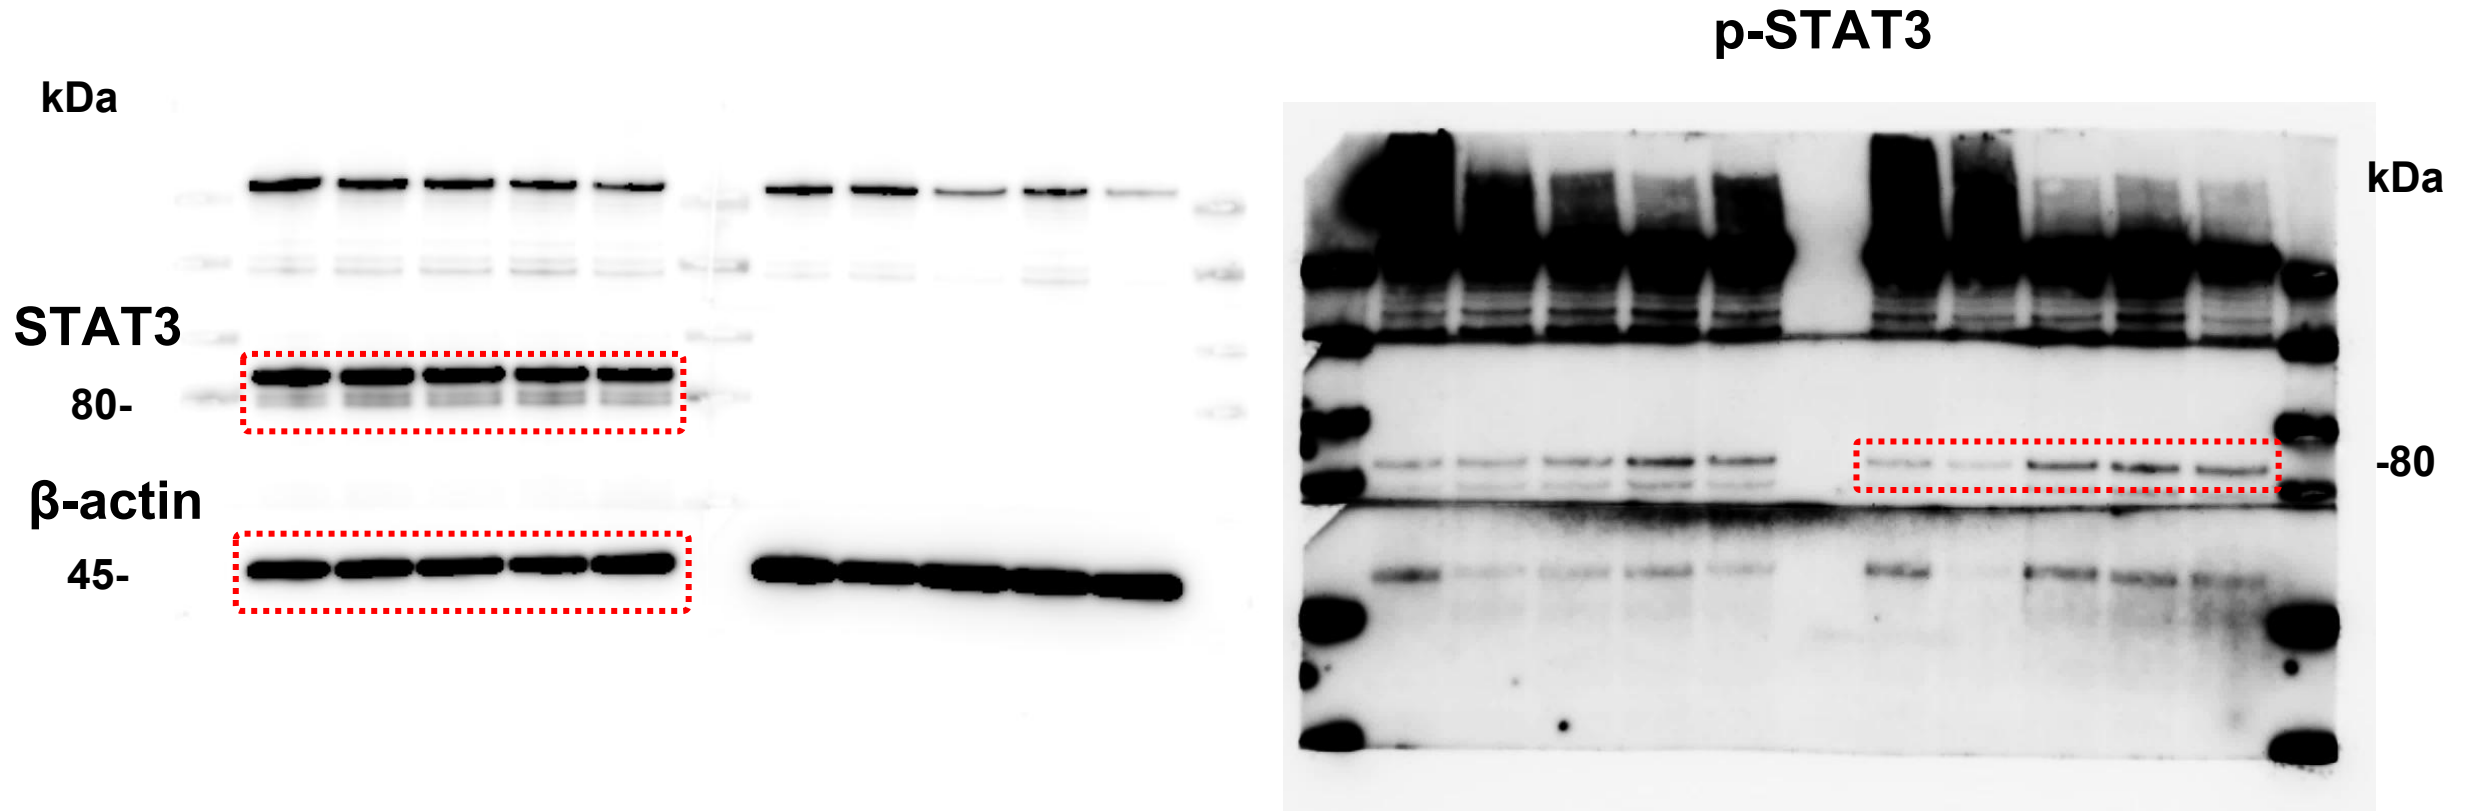

**Note: 1. In STAT3 and  $\beta$ -actin expression, the same blot and different exposure times (short and long exposures shown) were used. Between p-STAT3 and STAT3 expression, separate, noncontiguous lanes from the same samples were used for each antibody.**

**2. Bands used in Figures are indicated by boxes in red outlines.**

**Fig. 7F (p-AKT-AKT-Full unedited blot)**

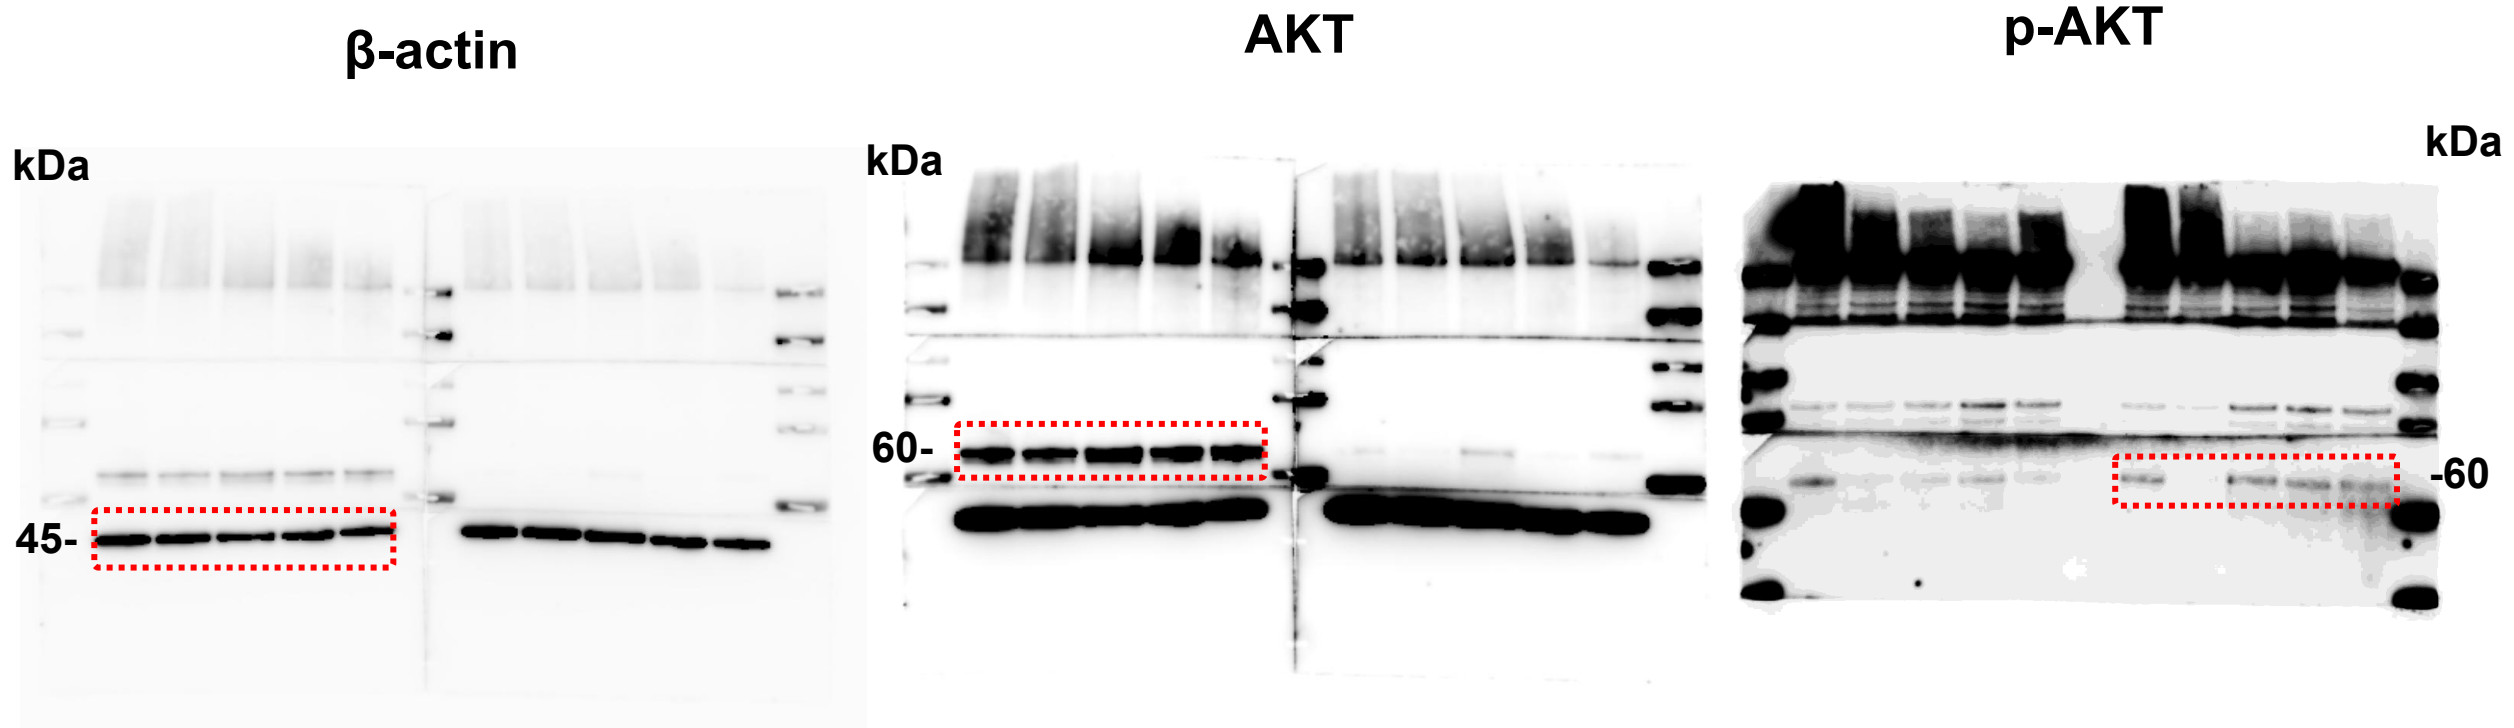

**Note: 1. In AKT and  $\beta$ -actin expression, the same blot and different exposure times (short and long exposures shown) were used. Between p-AKT and AKT expression, separate, noncontiguous lanes from the same samples were used for each antibody.**

**2. Bands used in Figures are indicated by boxes in red outlines.**

**Fig. S2C (FAS-Full unedited blot)**

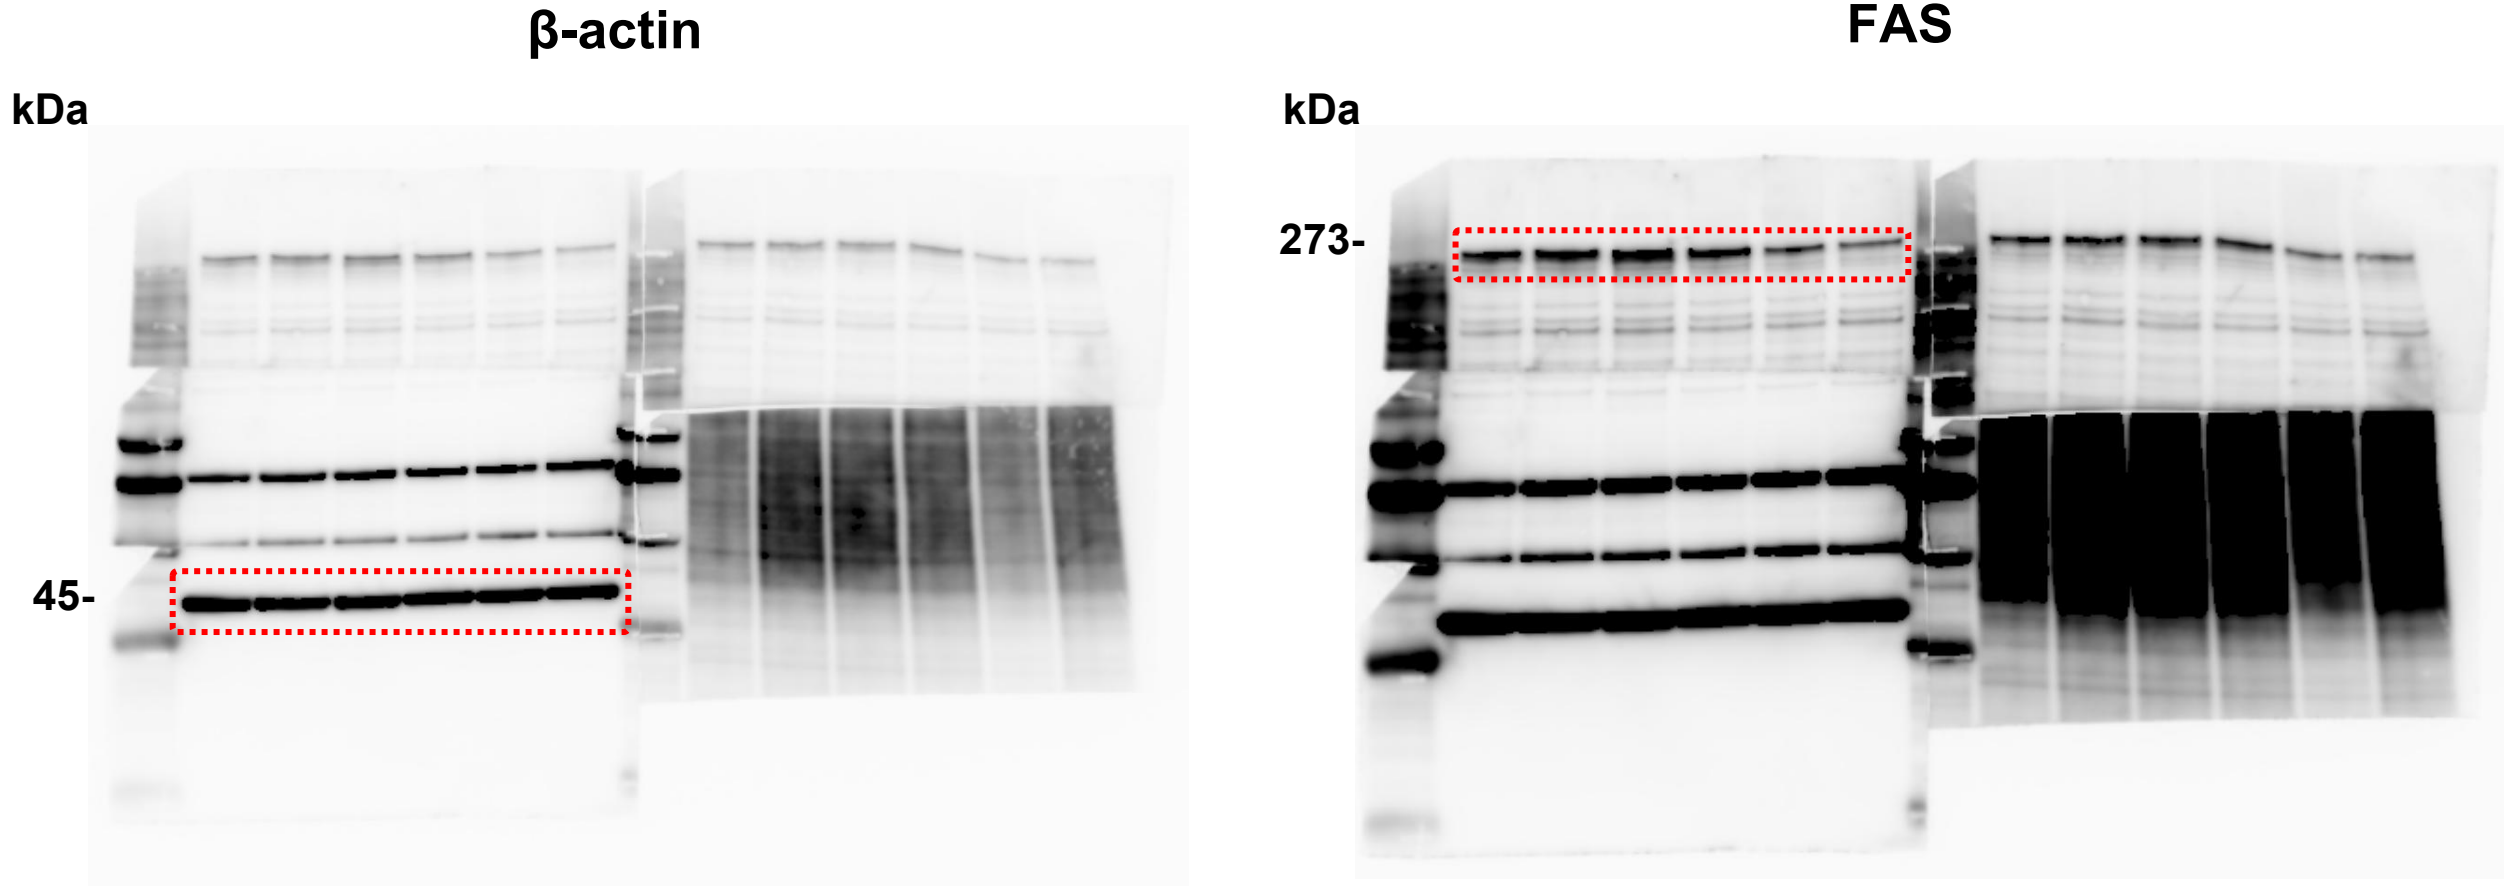

**Note: 1. The same blot and different exposure times (short and long exposures shown) were used.  
2. Bands used in Figures are indicated by boxes in red outlines.**

**Fig. S2C (CPT1-Full unedited blot)**

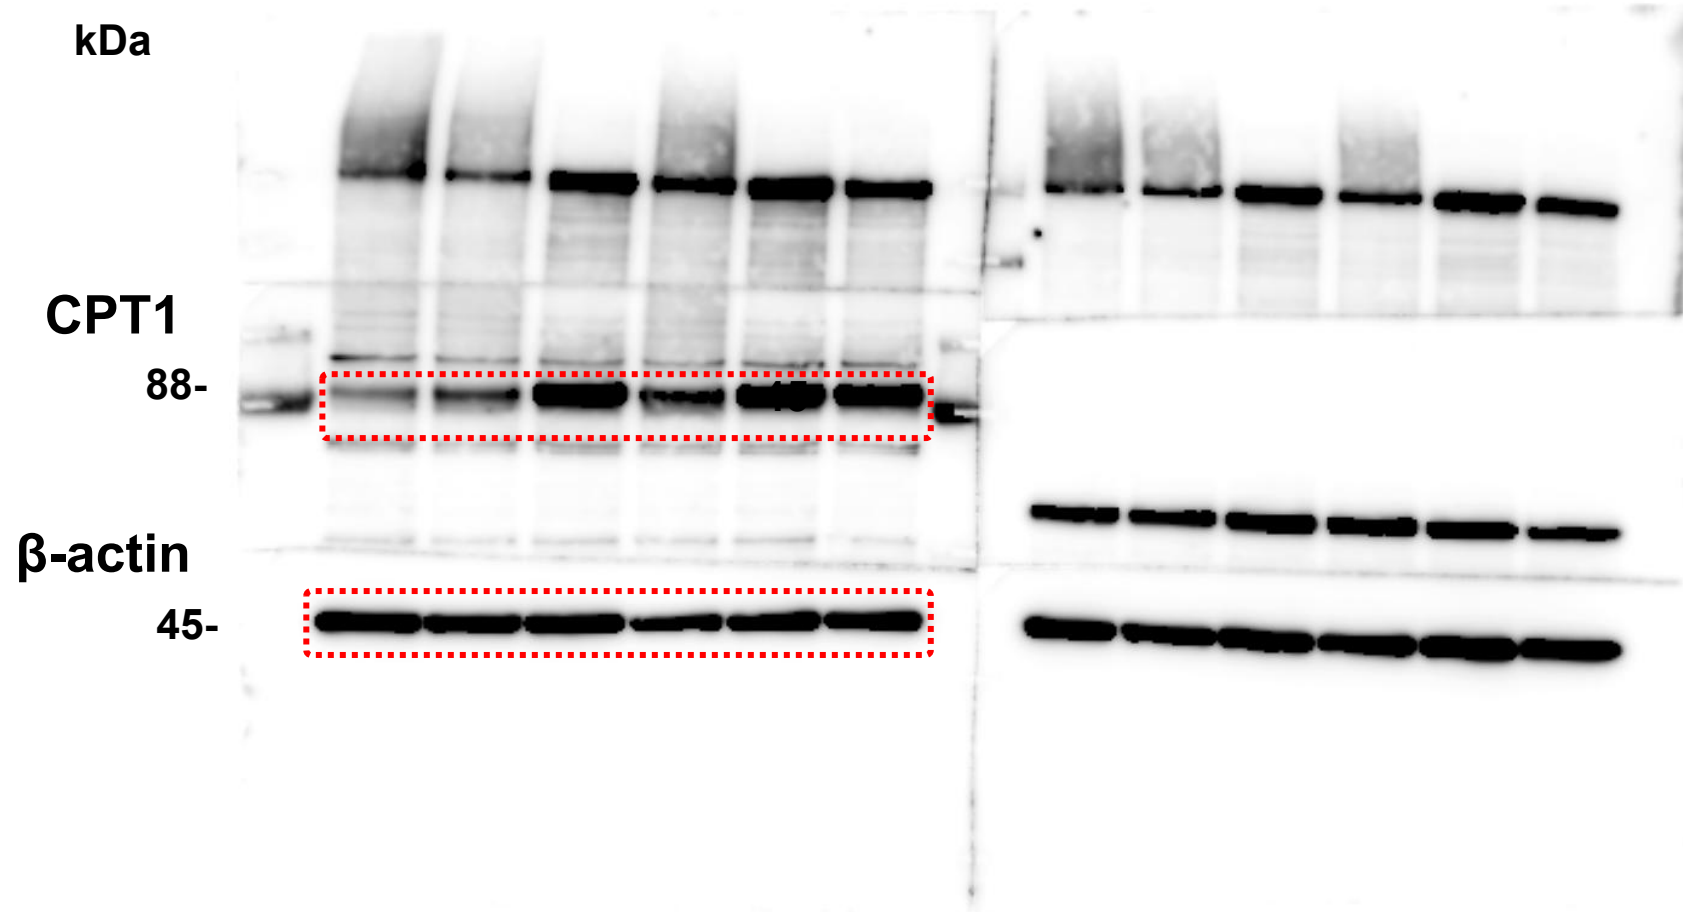

**Note: 1. The same blot was used.  
2. Bands used in Figures are indicated by boxes in red outlines.**

**Fig. S2C (CPT2-Full unedited blot)**

$\beta$ -actin

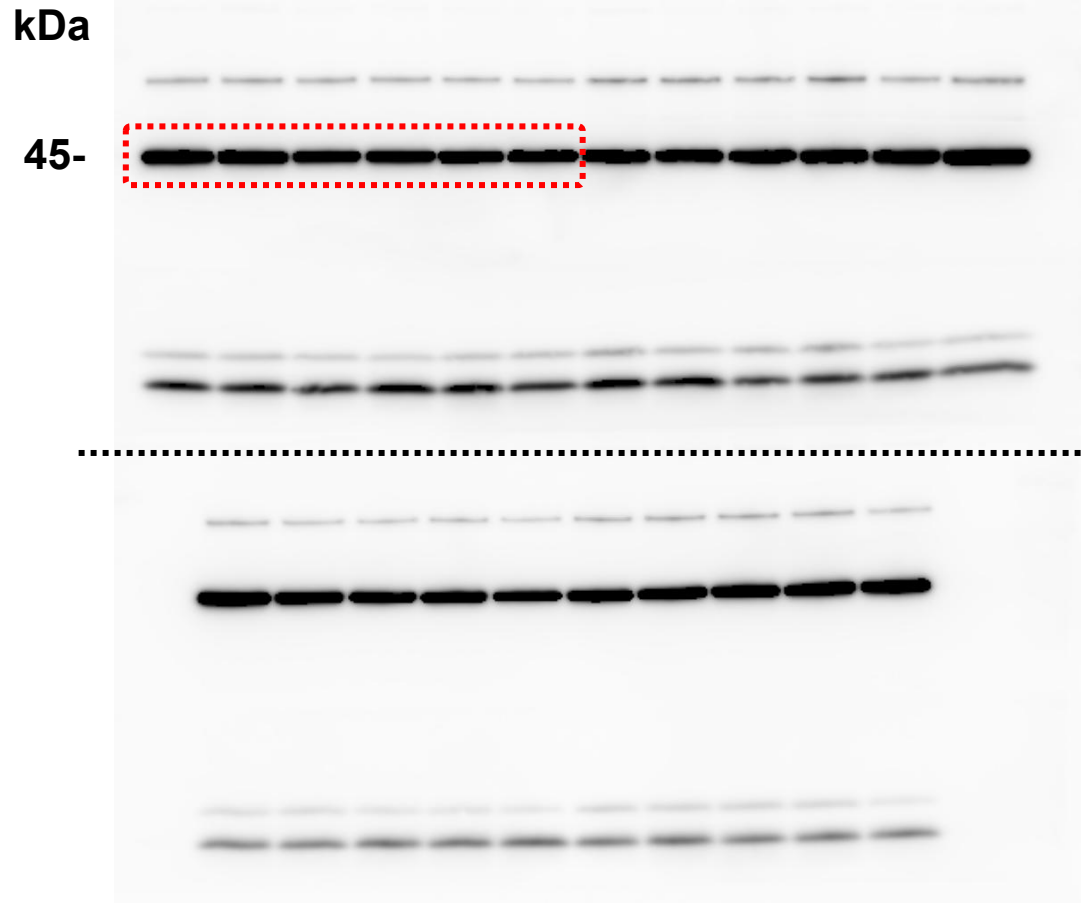

CPT2

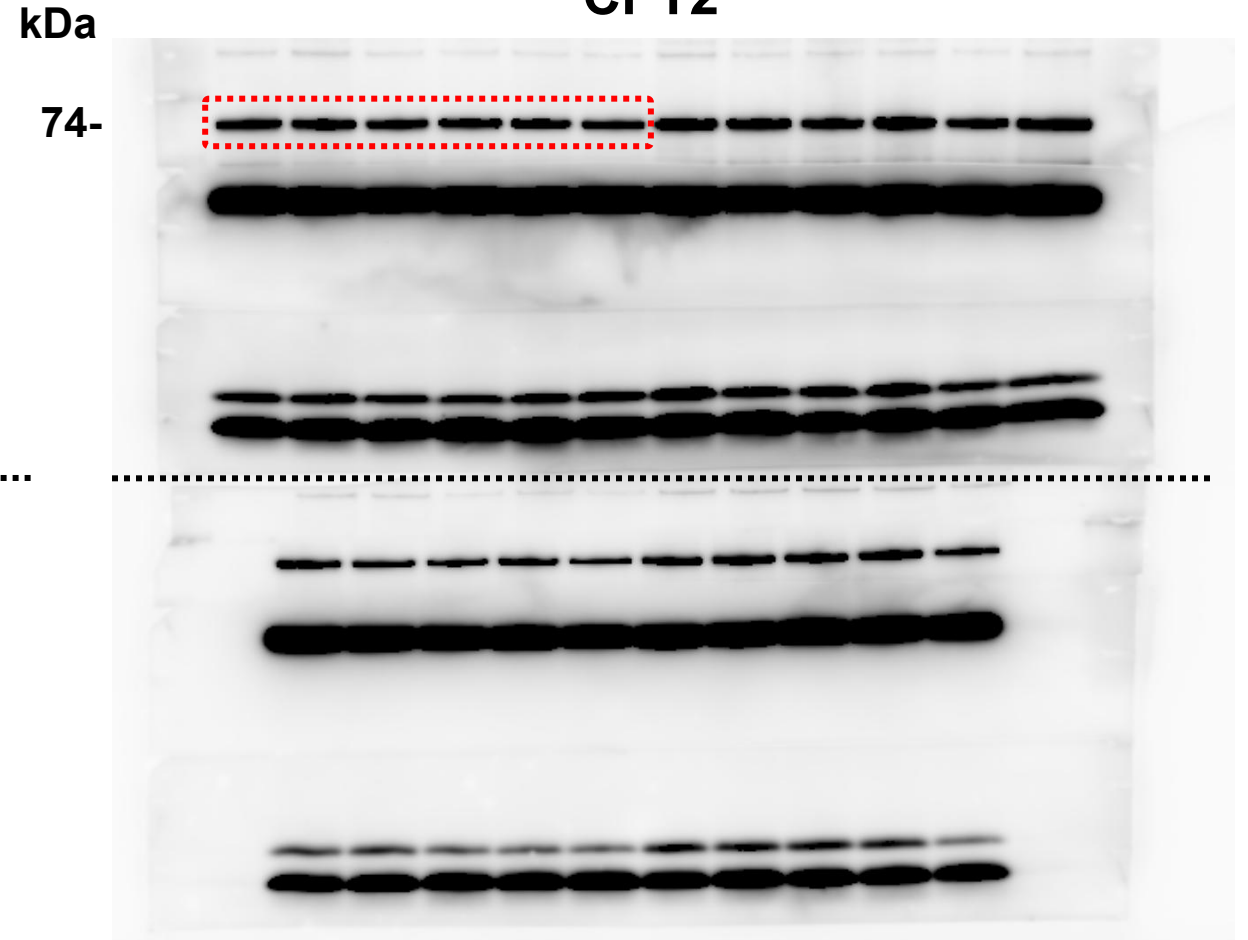

**Note: 1. The same blot and different exposure times (short and long exposures shown) were used.  
2. Bands used in Figures are indicated by boxes in red outlines.**

**Fig. S2C (PPAR $\alpha$ -Full unedited blot)**

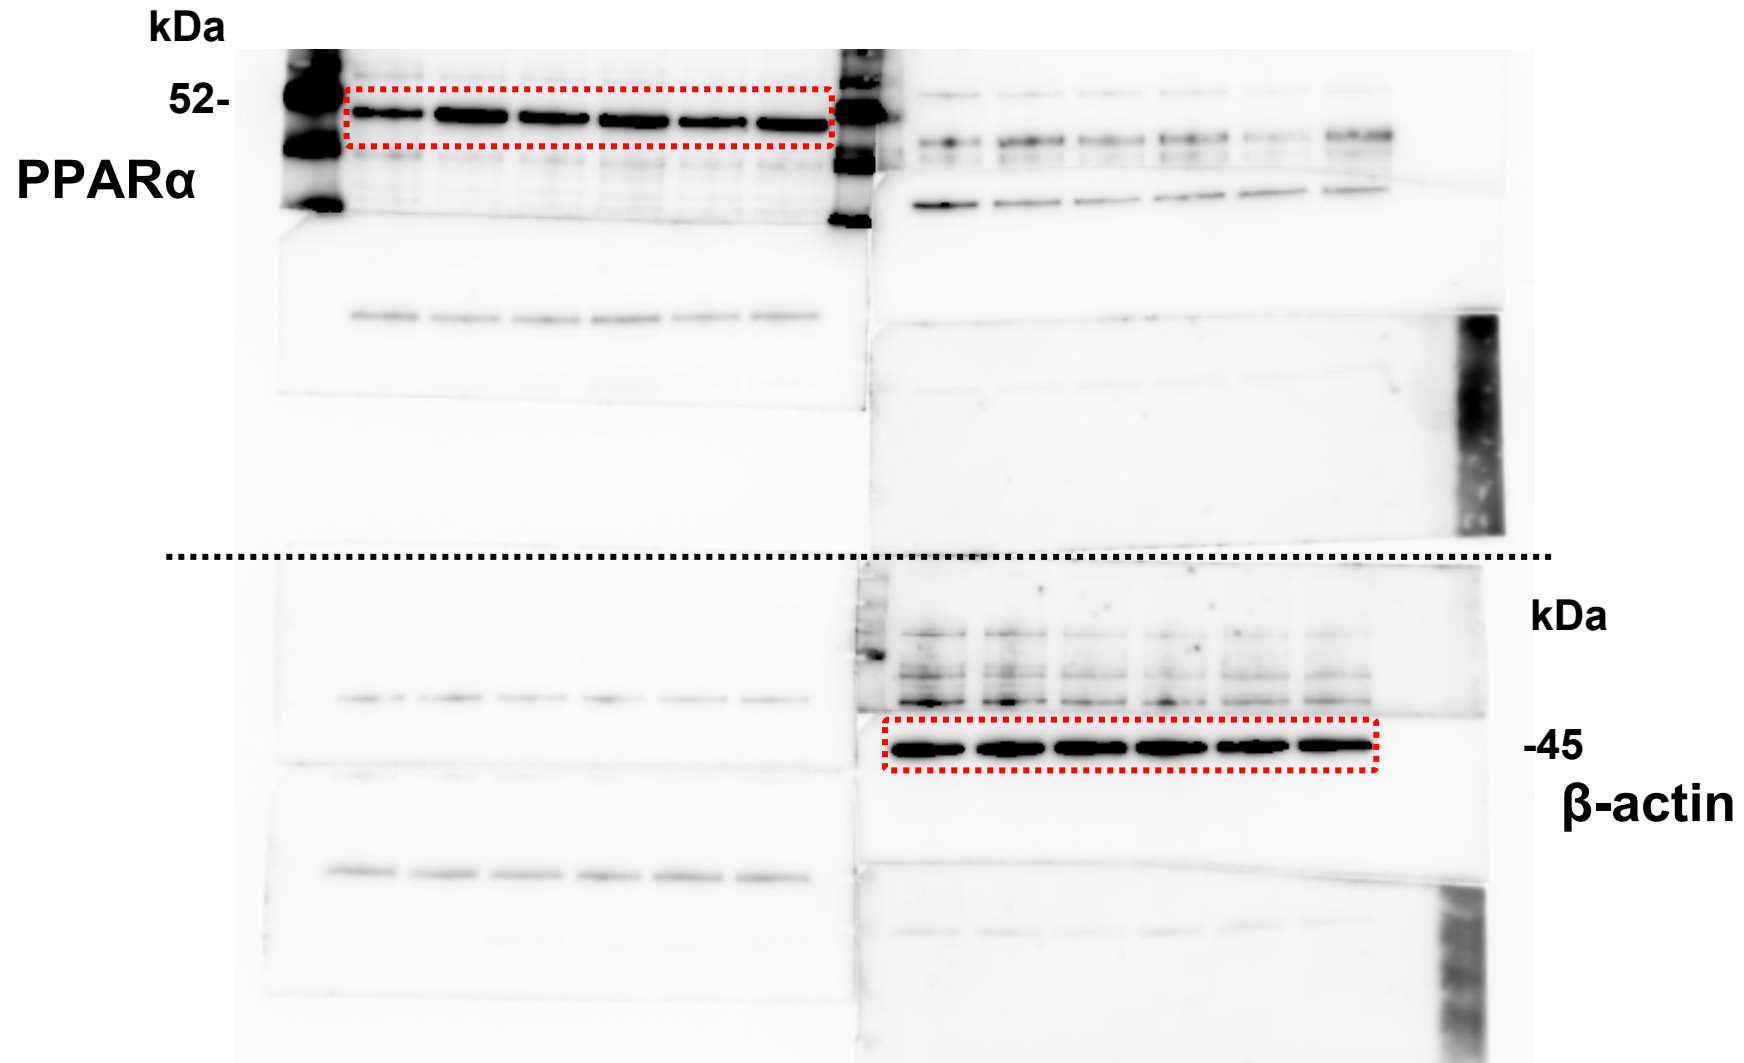

**Note: 1. The same blot was used.**

**2. Bands used in Figures are indicated by boxes in red outlines.**

**Fig. S4B (IL-10R $\alpha$  Full unedited blot)**

$\beta$ -actin

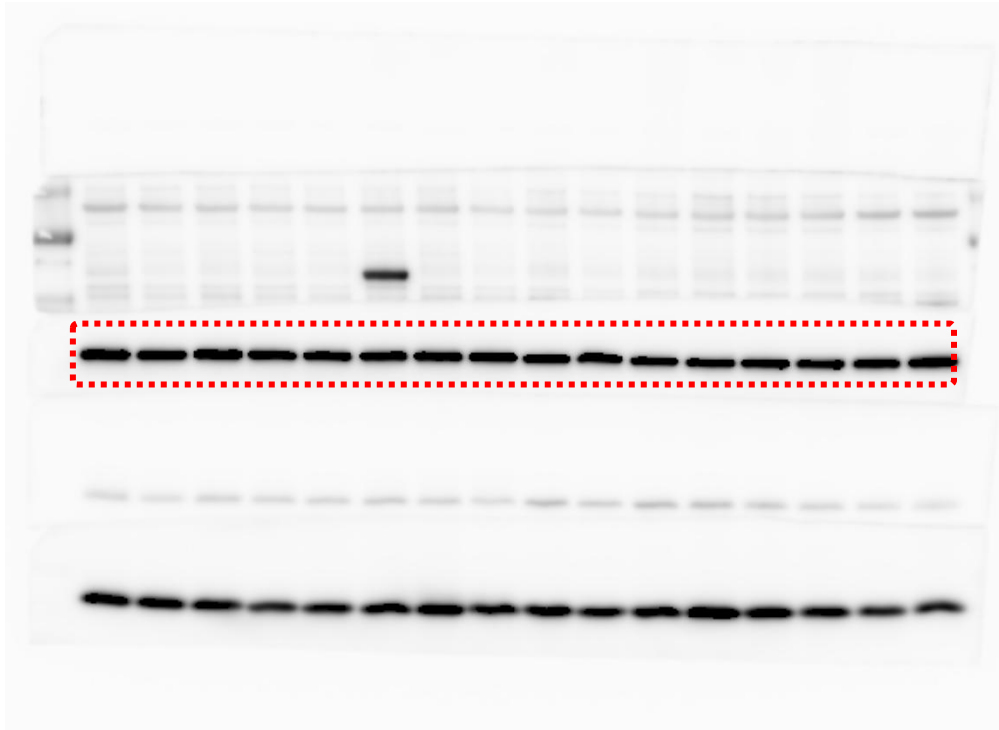

kDa

-45

IL-10R $\alpha$

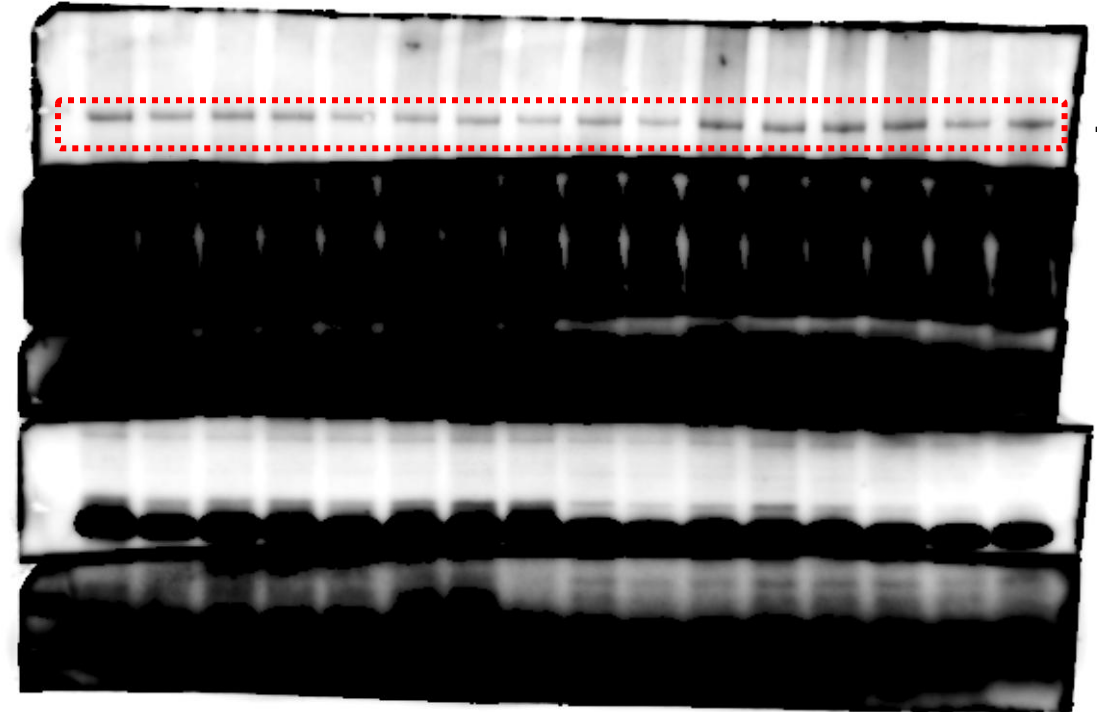

kDa

-100

**Note: 1. The same blot and different exposure times (short and long exposures shown) were used.  
2. Bands used in Figures are indicated by boxes in red outlines.**

**Fig. S4D (FAS-Full unedited blot)**

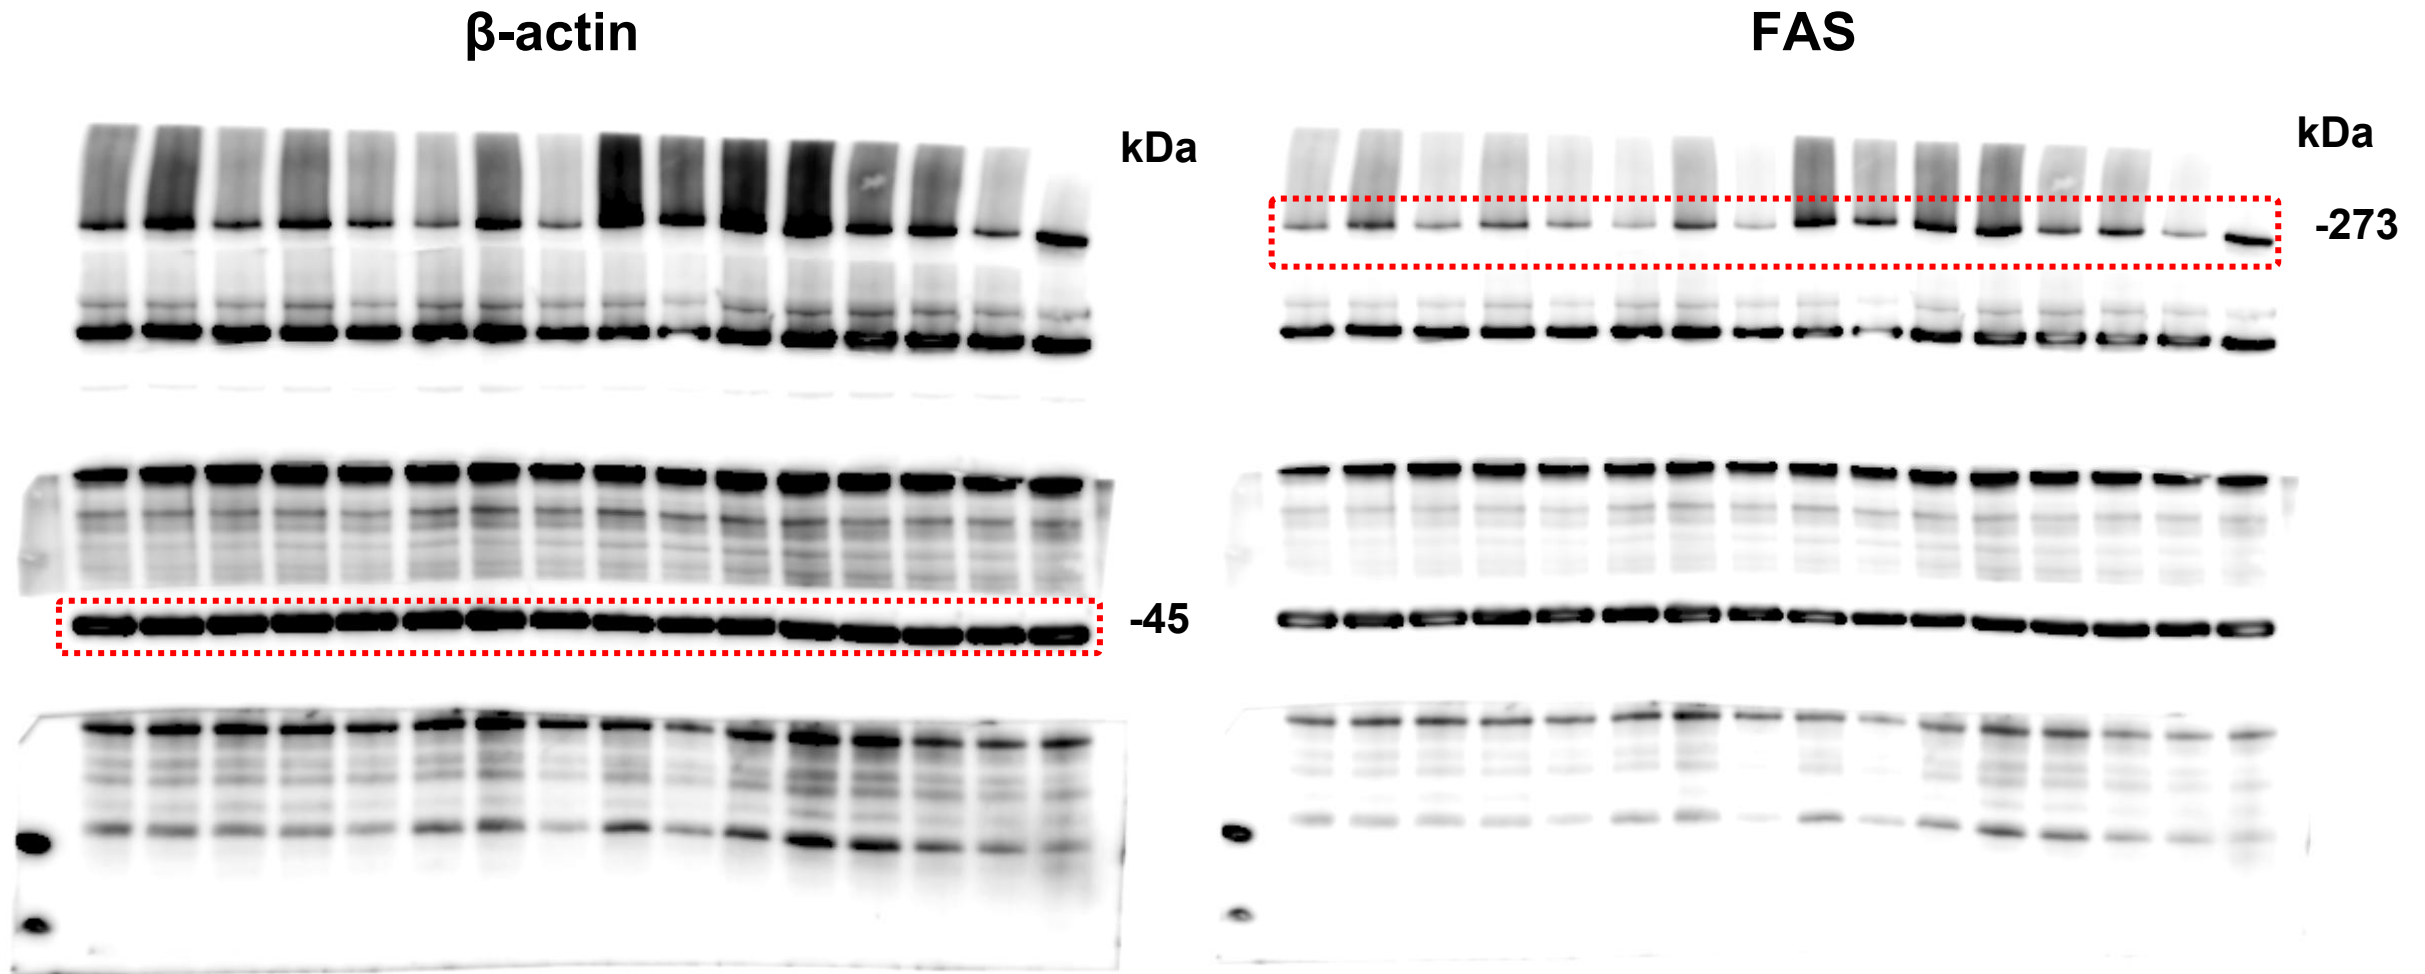

**Note: 1. The same blot and different exposure times (short and long exposures shown) were used..**  
**2. Bands used in Figures are indicated by boxes in red outlines.**

**Fig. S4D (CPT1-Full unedited blot)**

$\beta$ -actin

CPT1

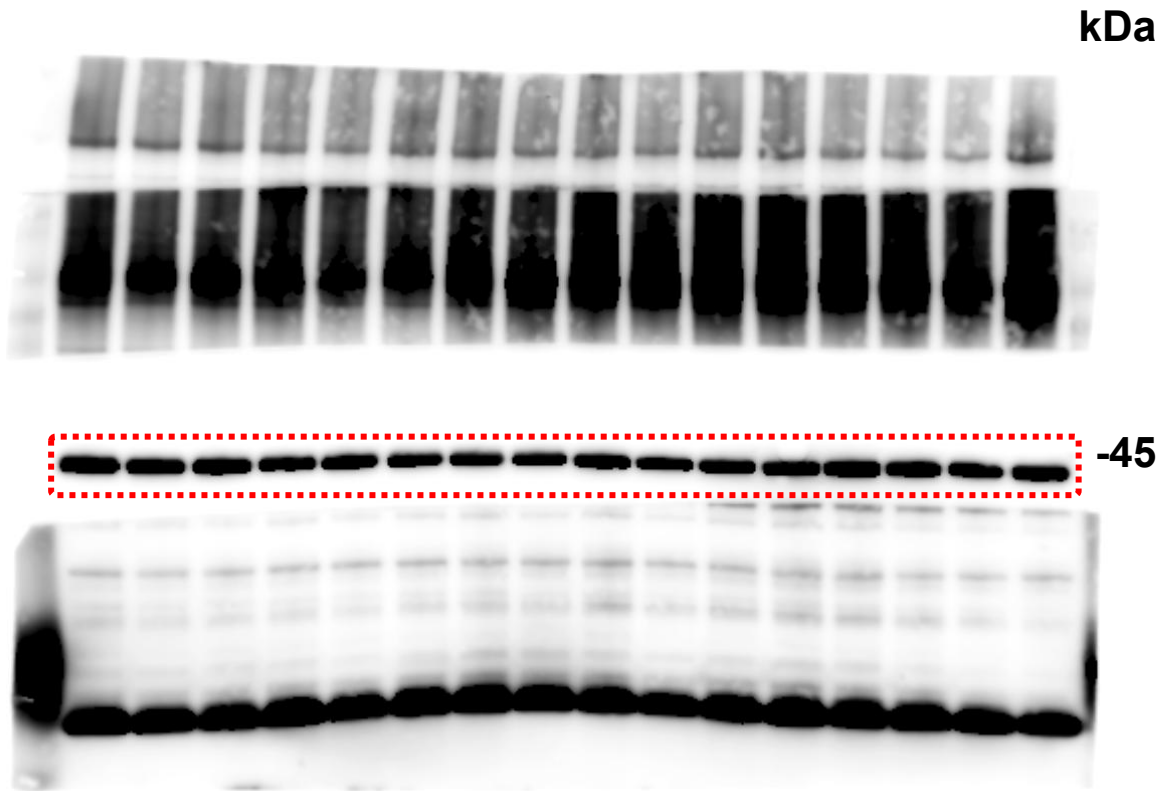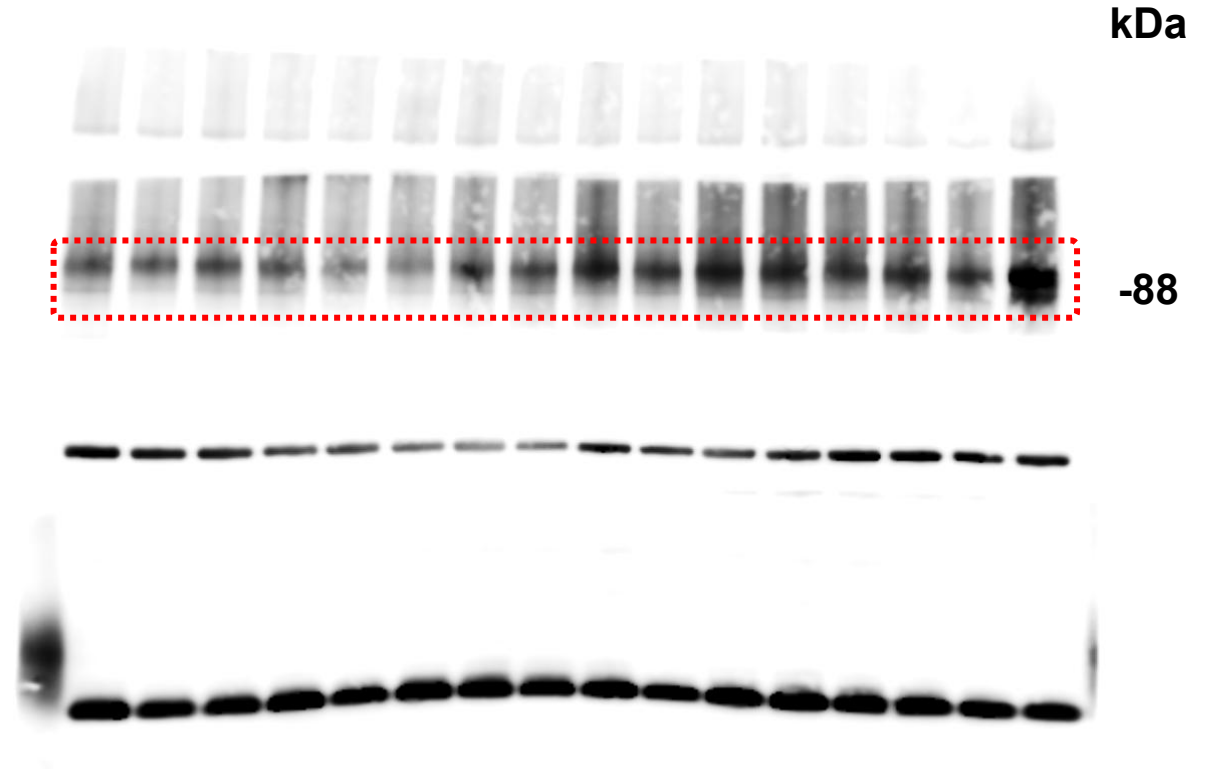

**Note: 1. The same blot and different exposure times (short and long exposures shown) were used.  
2. Bands used in Figures are indicated by boxes in red outlines.**

**Fig. S4D (CPT2-Full unedited blot)**

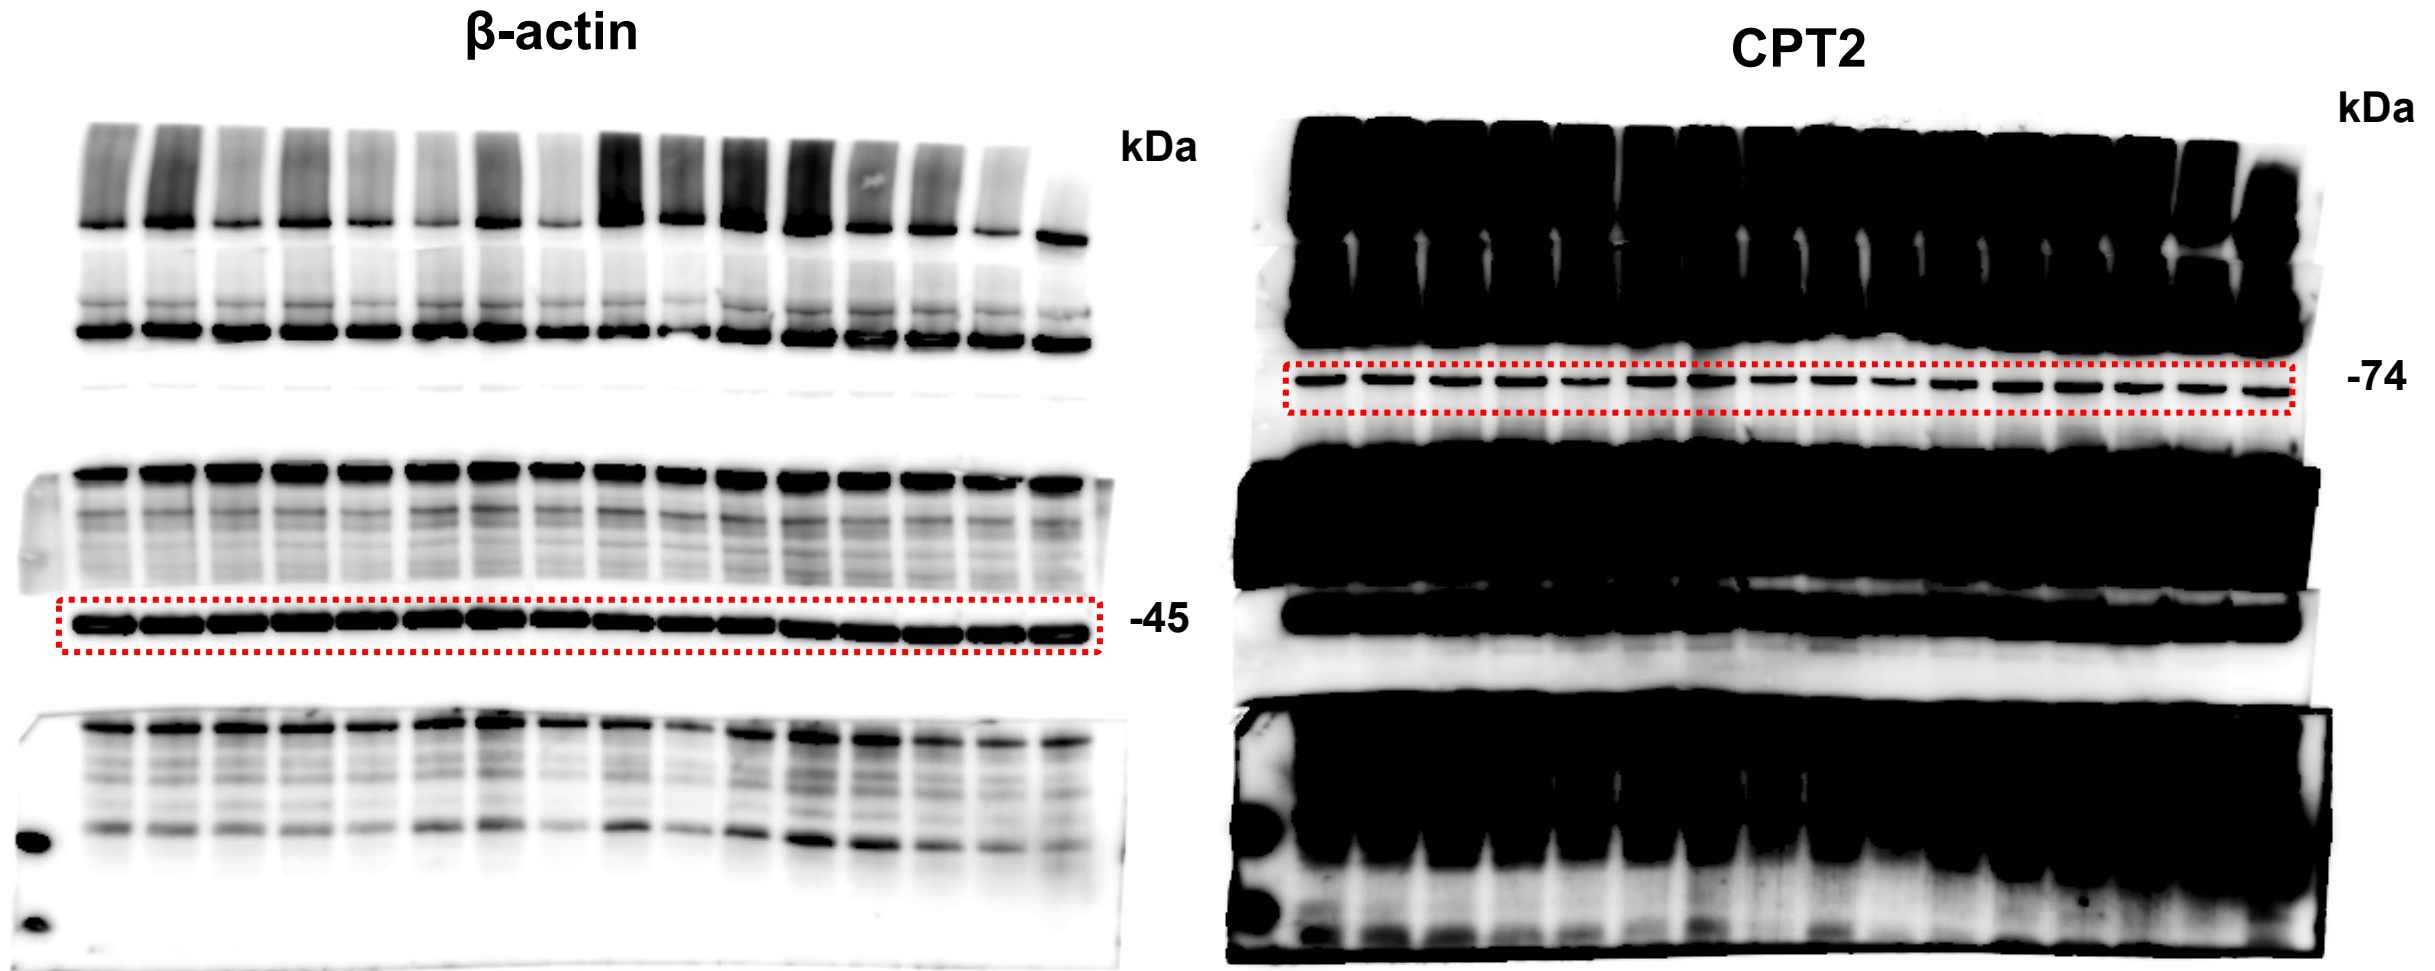

**Note: 1. The same blot and different exposure times (short and long exposures shown) were used.  
2. Bands used in Figures are indicated by boxes in red outlines.**

**Fig. S4D (PPAR $\alpha$ -Full unedited blot)**

$\beta$ -actin

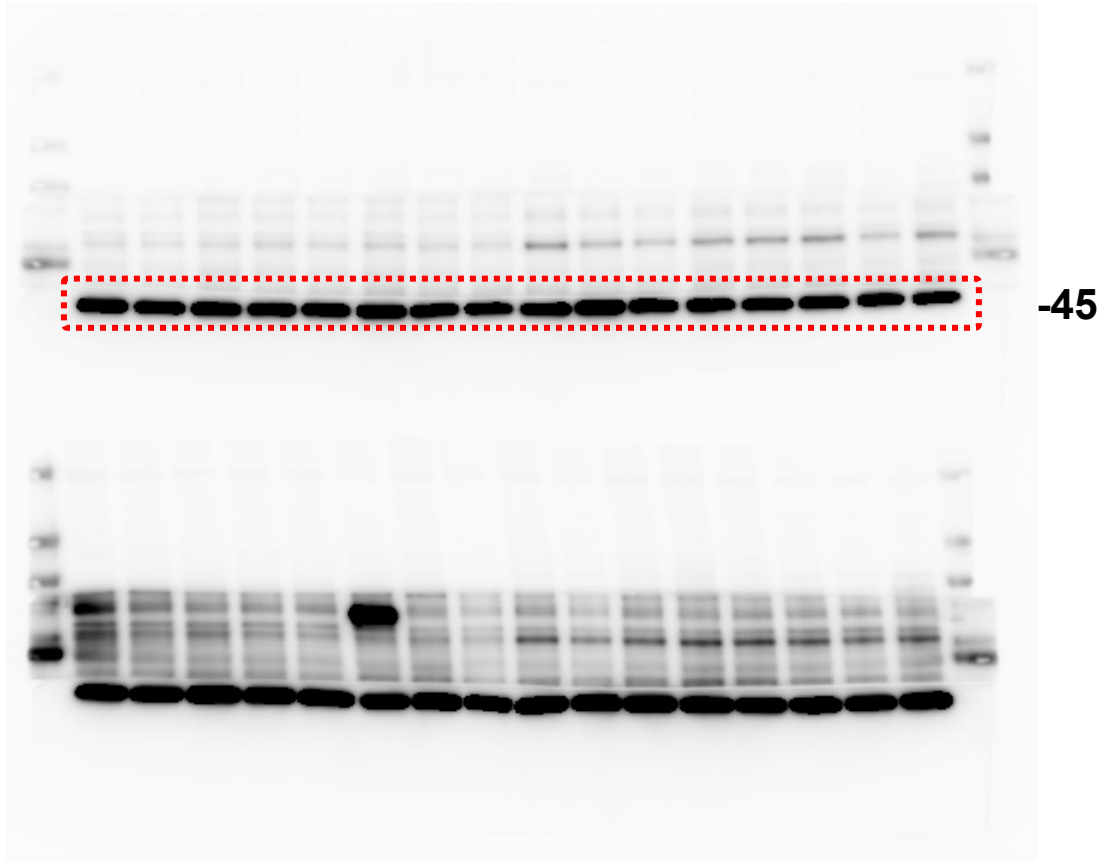

PPAR $\alpha$

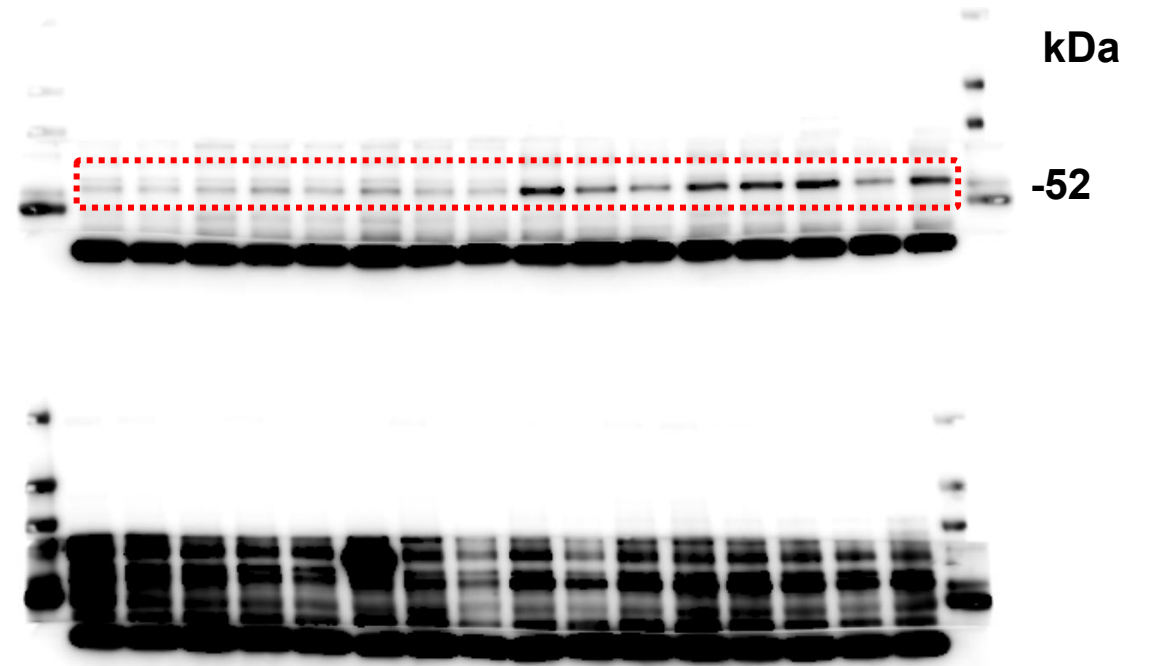

Note: 1. The same blot was used.

2. Bands used in Figures are indicated by boxes in red outlines.

**Fig. S7D (GLUT2-Full unedited blot)**

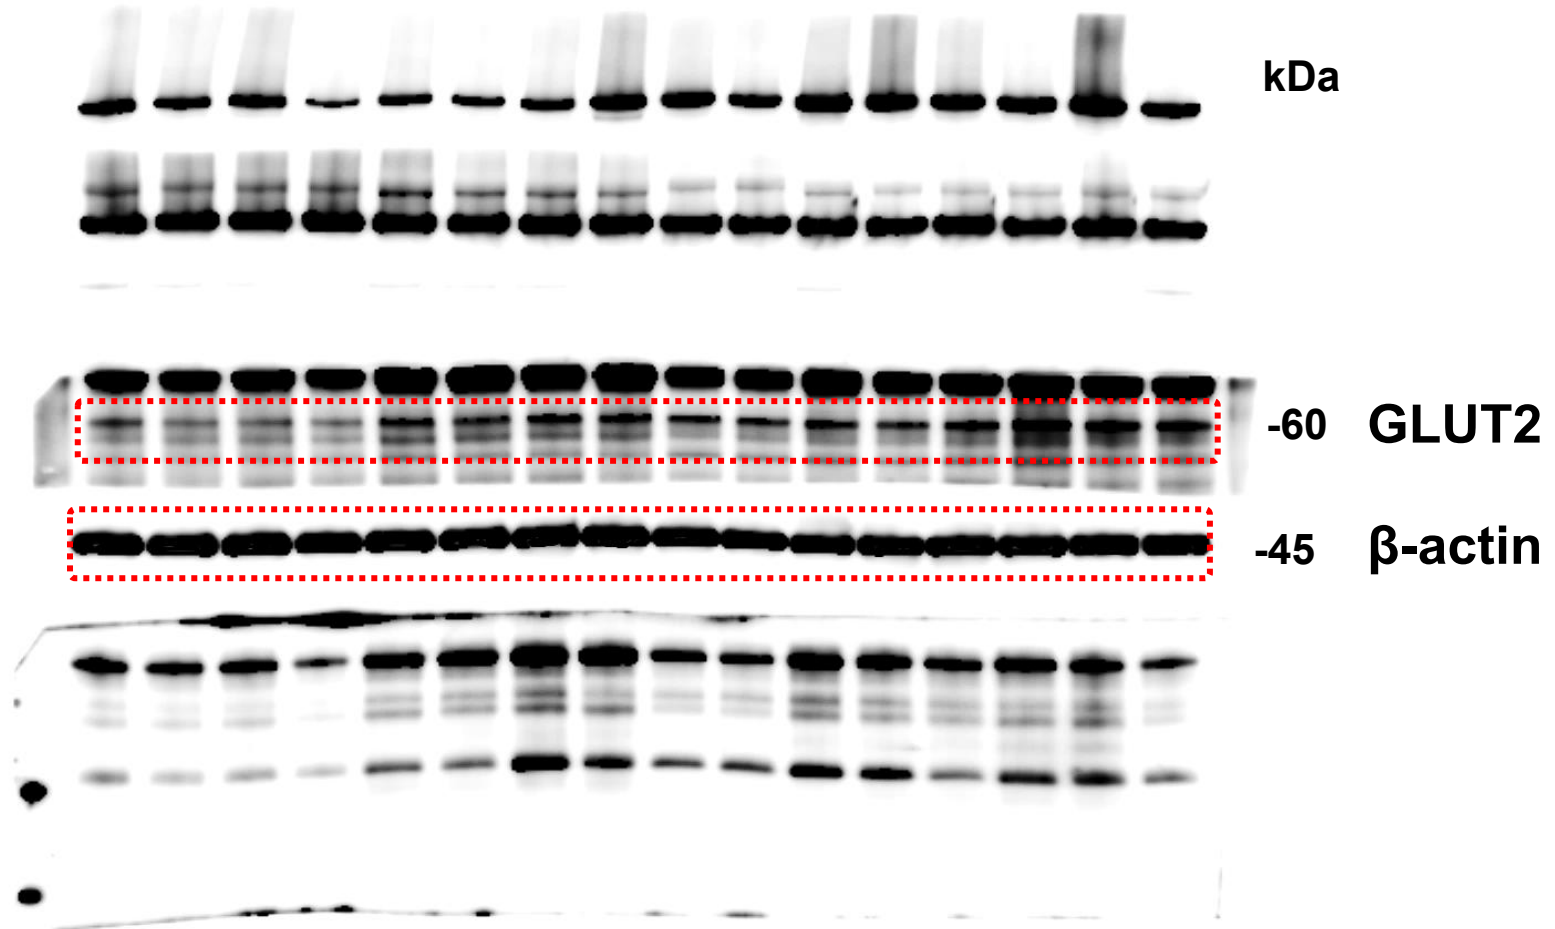

**Note: 1. The same blot was used.**

**2. Bands used in Figures are indicated by boxes in red outlines.**

**Fig. S7D (GK-Full unedited blot)**

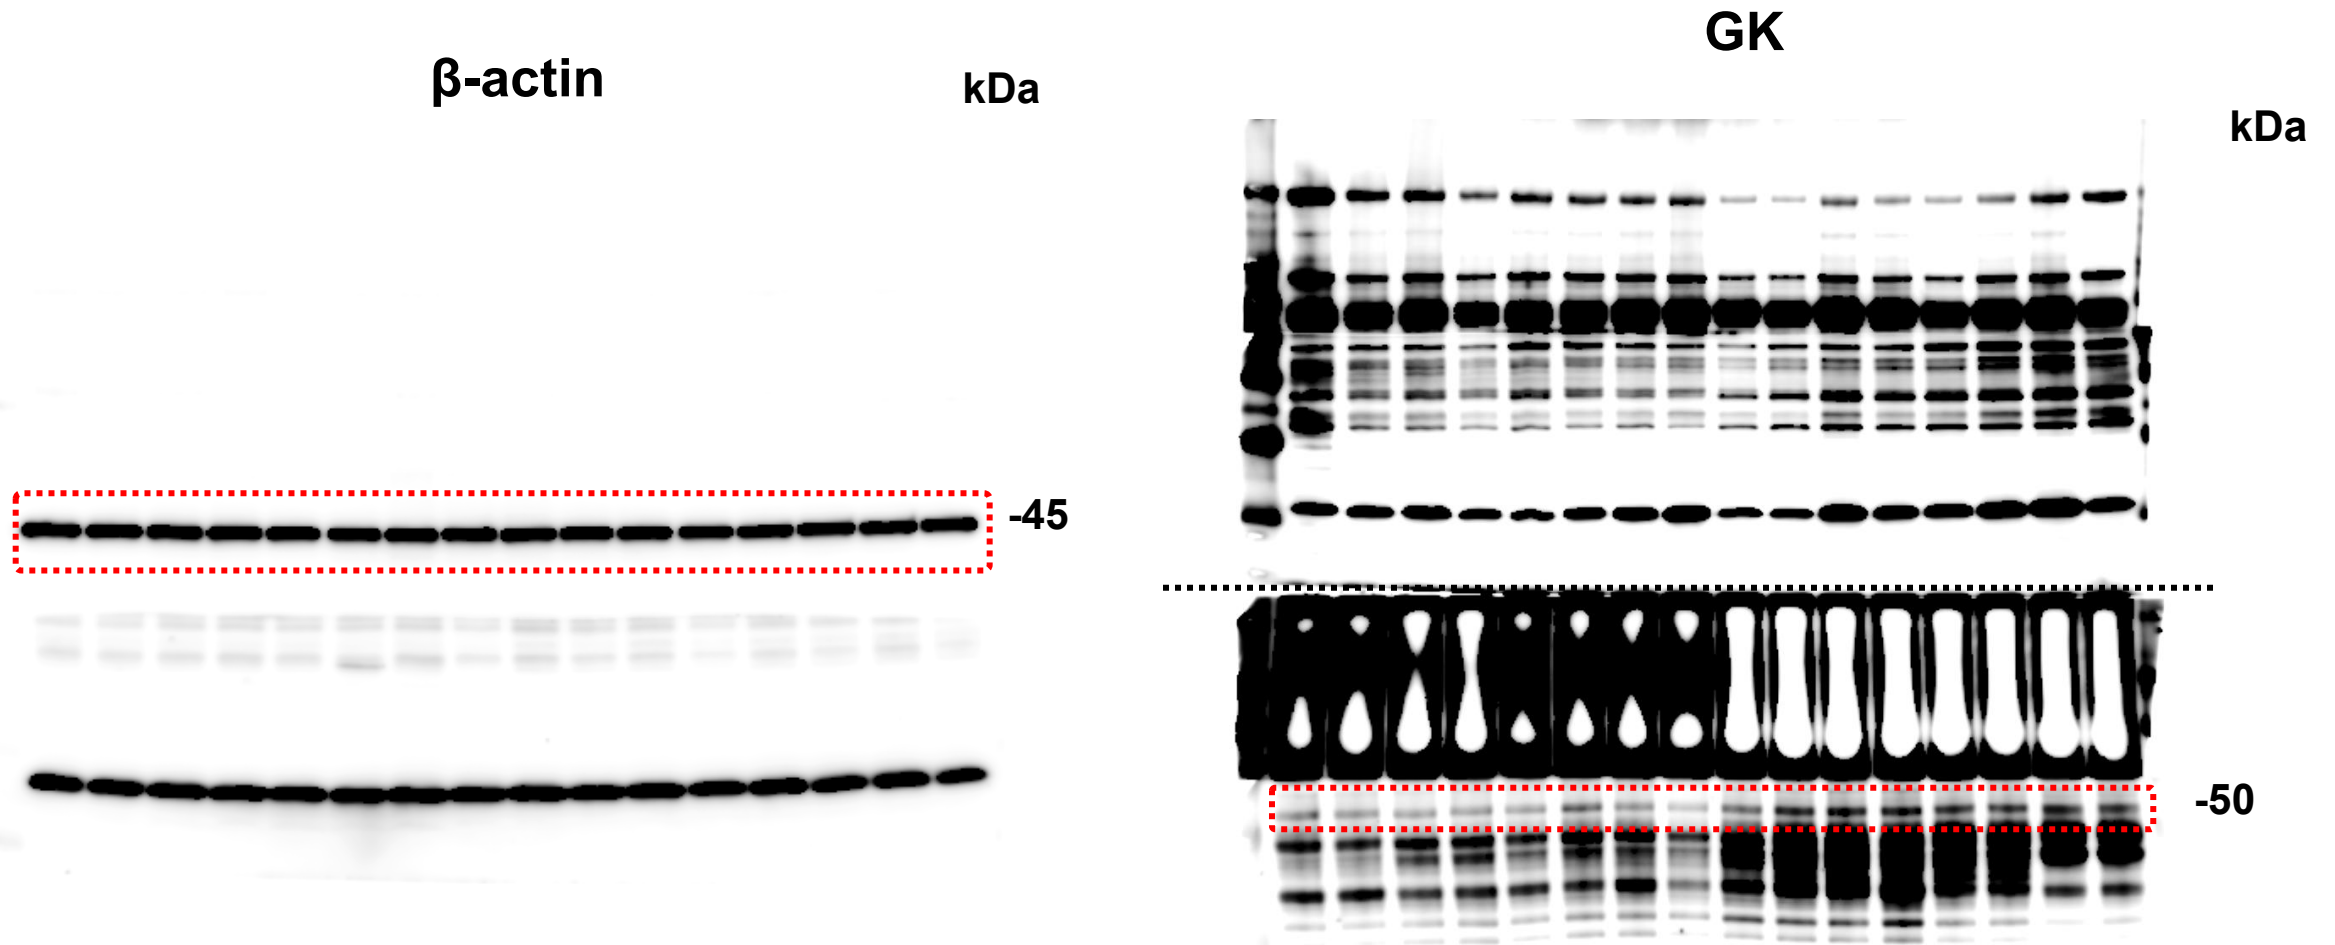

**Note: 1. Separate, noncontiguous lanes from the same samples were used for each antibody.  
2. Bands used in Figures are indicated by boxes in red outlines.**

**Fig. S7D (p-GS-GS-Full unedited blot)**

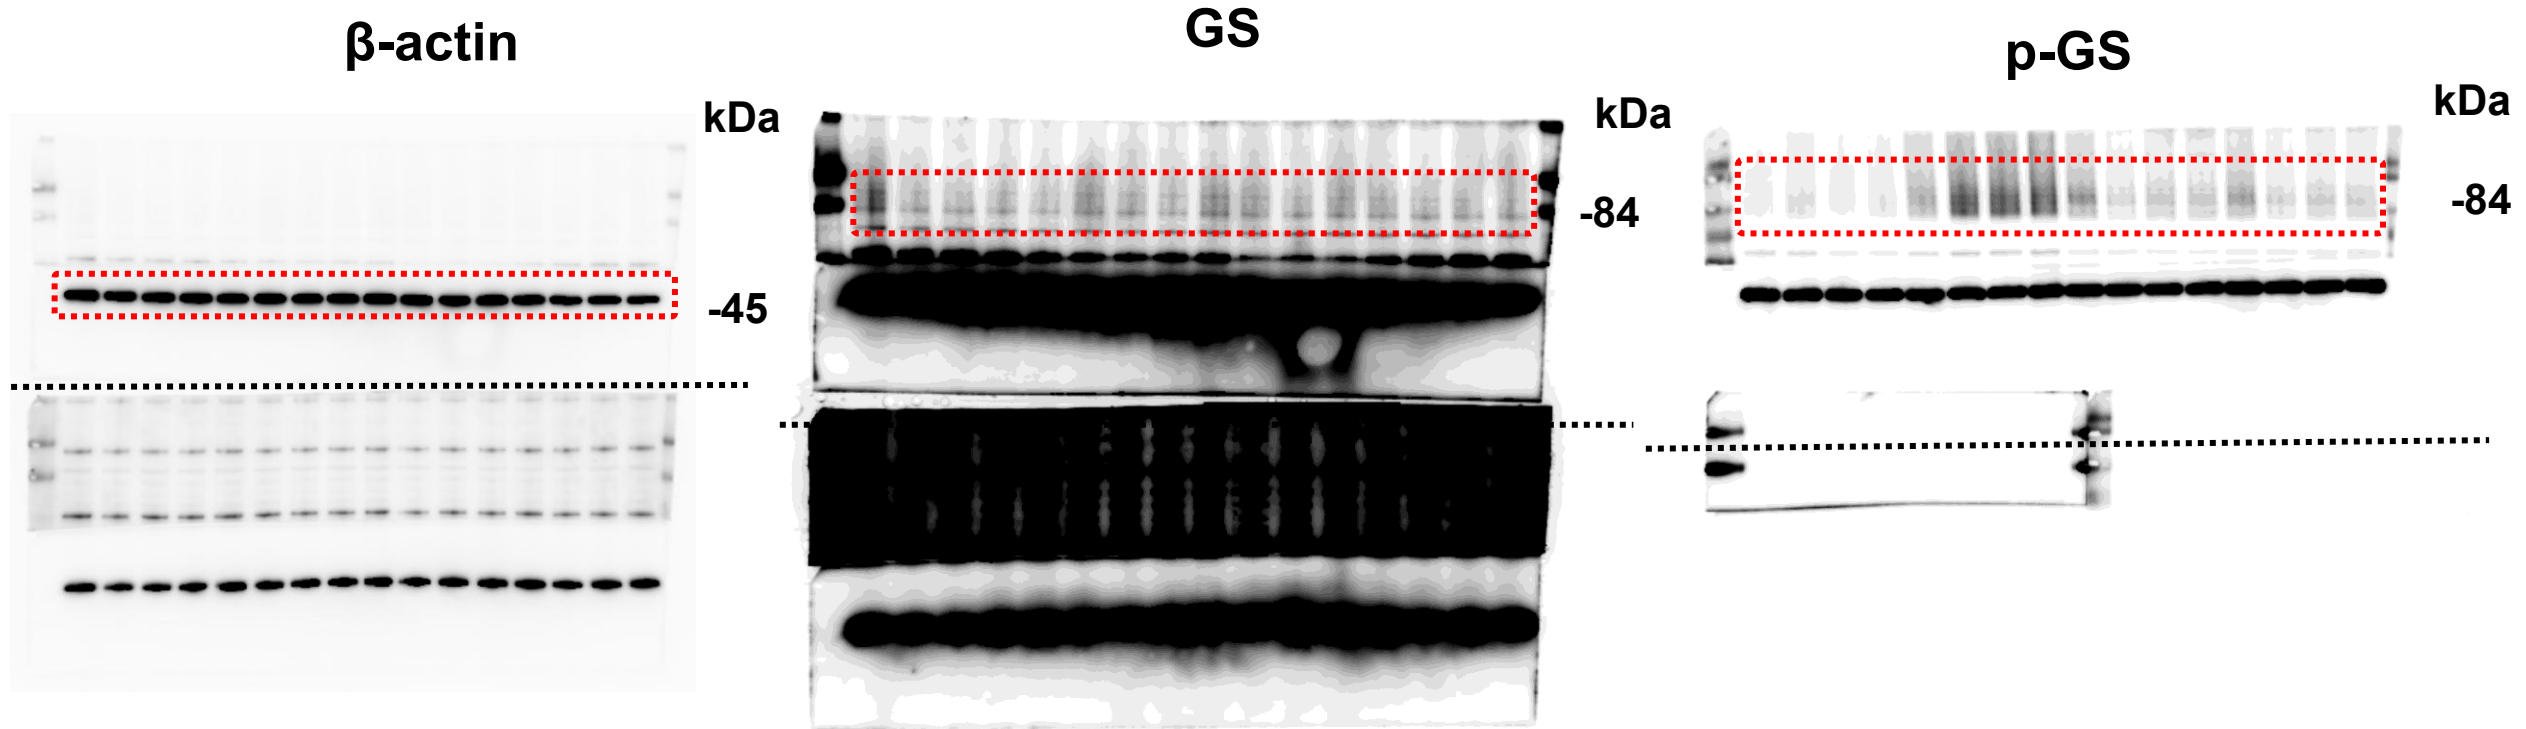

**Note: 1. In GS and  $\beta$ -actin expression, the same blot and different exposure times (short and long exposures shown) were used. Between p-GS and GS expression, separate, noncontiguous lanes from the same samples were used for each antibody.**

**2. Bands used in Figures are indicated by boxes in red outlines.**

**Fig. S7D (p-GP-GP-Full unedited blot)**

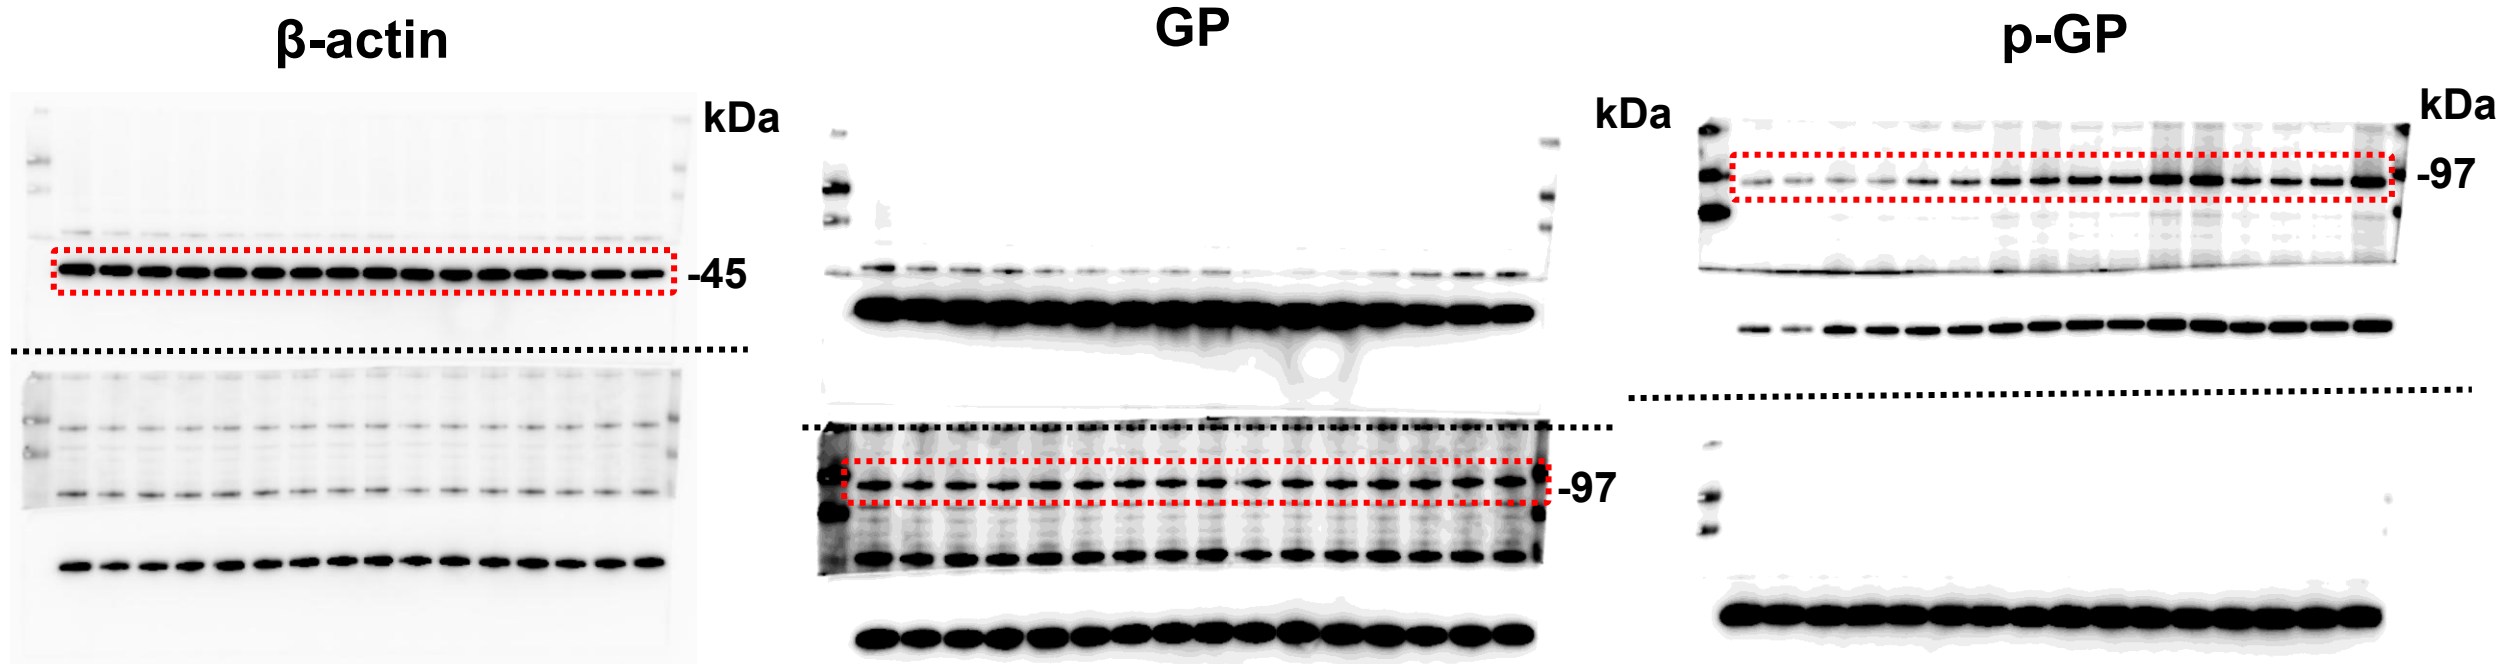

**Note: 1. In GP and  $\beta$ -actin expression, the same blot and different exposure times (short and long exposures shown) were used. Between p-GP and GP expression, separate, noncontiguous lanes from the same samples were used for each antibody.**

**2. Bands used in Figures are indicated by boxes in red outlines.**

**Fig. S7D (PCK1-Full unedited blot)**

$\beta$ -actin

PCK1

kDa

-63

**See Fig. S7D (GK-Full unedited blot)**

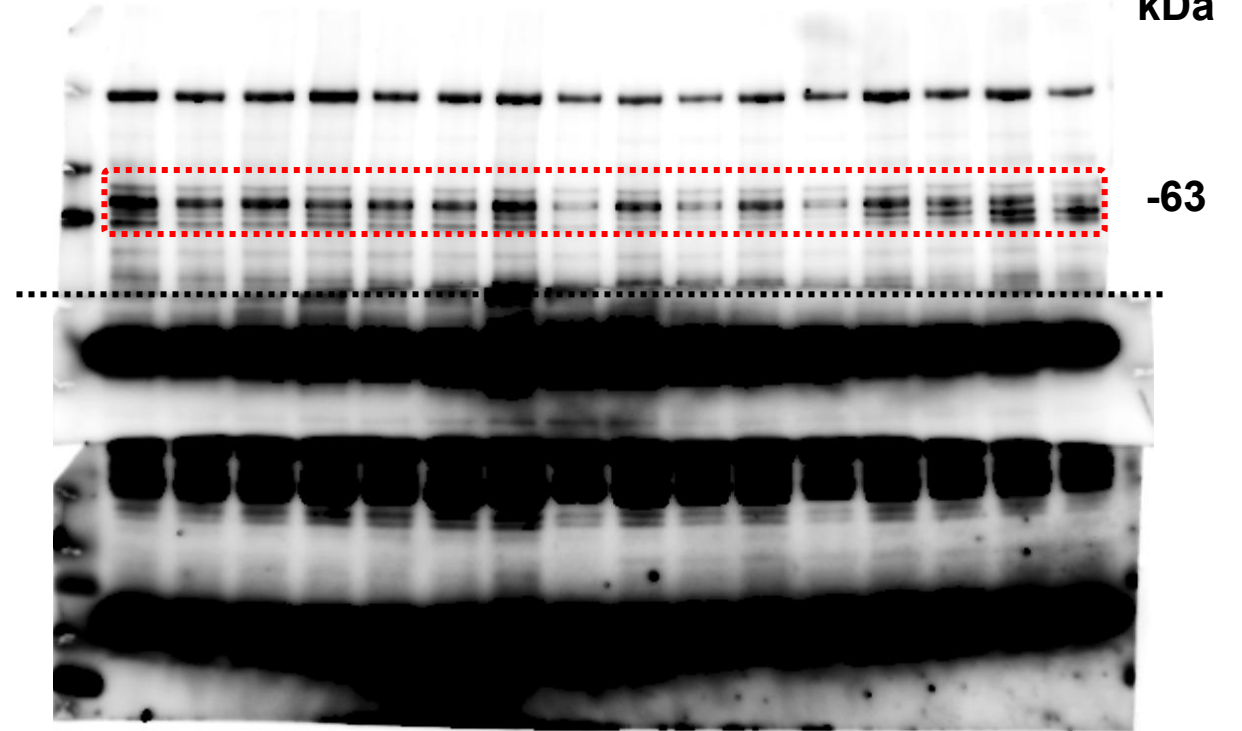

**Note: 1. The same blot and different exposure times (short and long exposures shown) were used.  
2. Bands used in Figures are indicated by boxes in red outlines.**

**Fig. S8F (SOD1-Full unedited blot)**

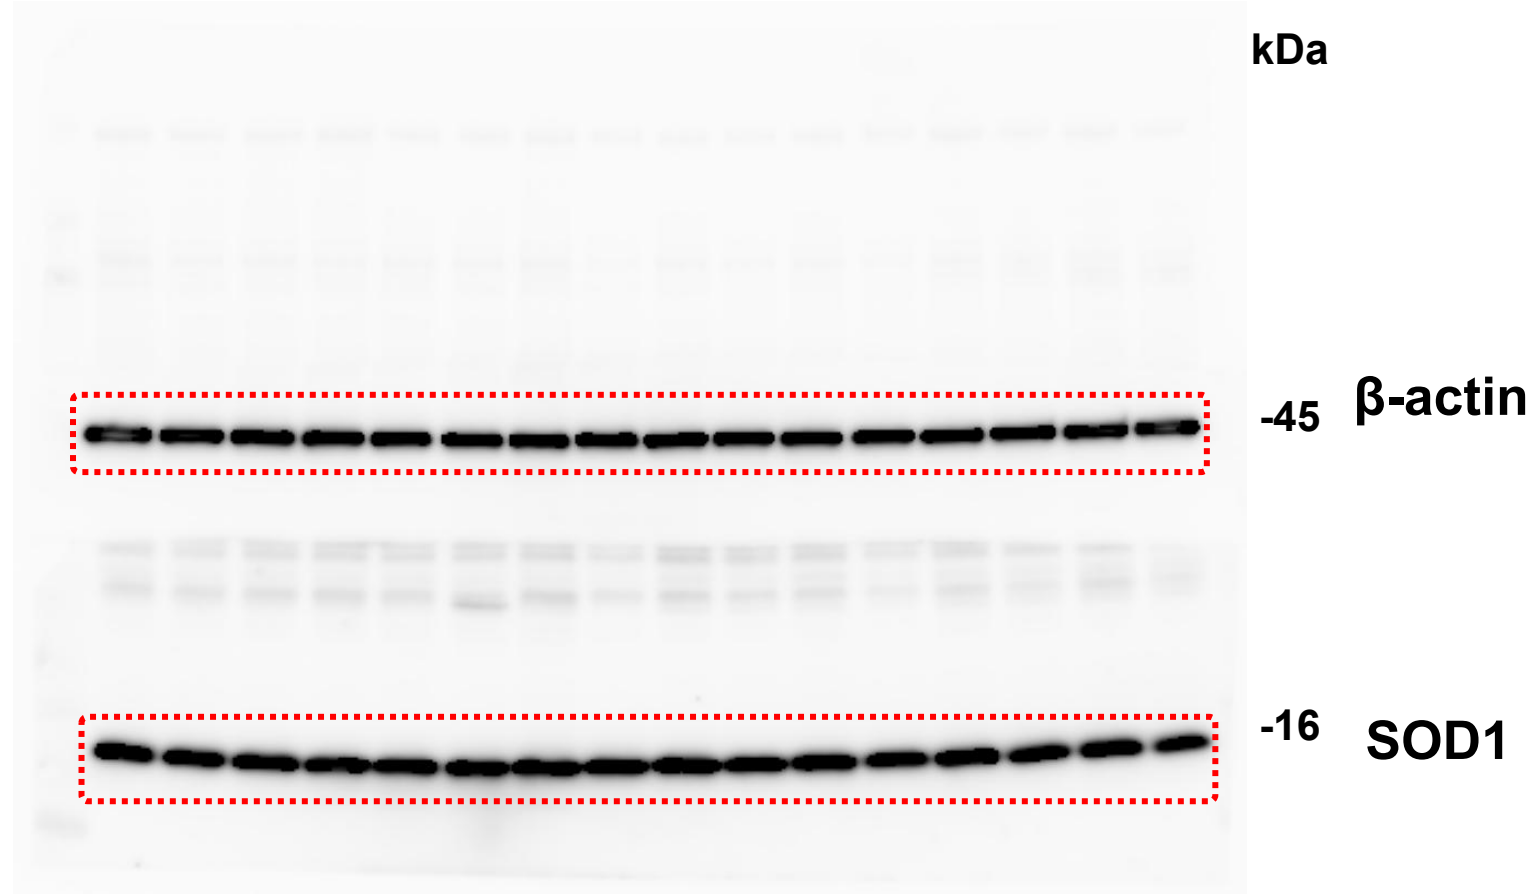

**Note: 1. The same blot was used.**

**2. Bands used in Figures are indicated by boxes in red outlines.**

**Fig. S8F (SOD2-Full unedited blot)**

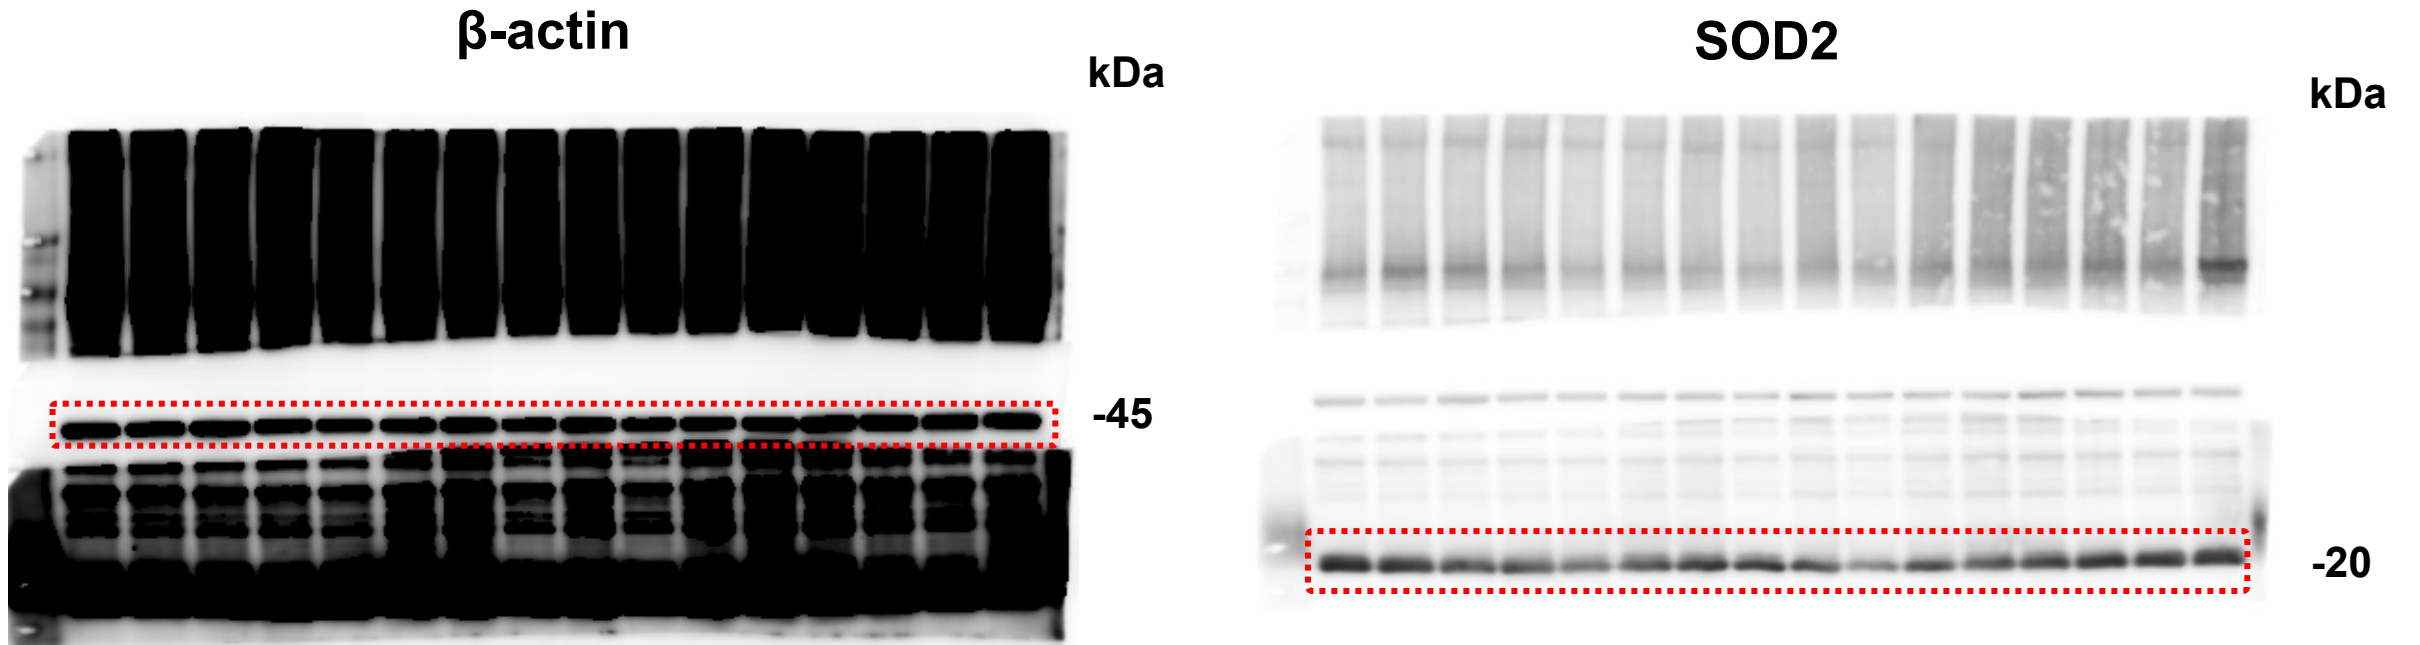

**Note: 1. The same blot and different exposure times (short and long exposures shown) were used.  
2. Bands used in Figures are indicated by boxes in red outlines.**

**Fig. S8F (CAT-Full unedited blot)**

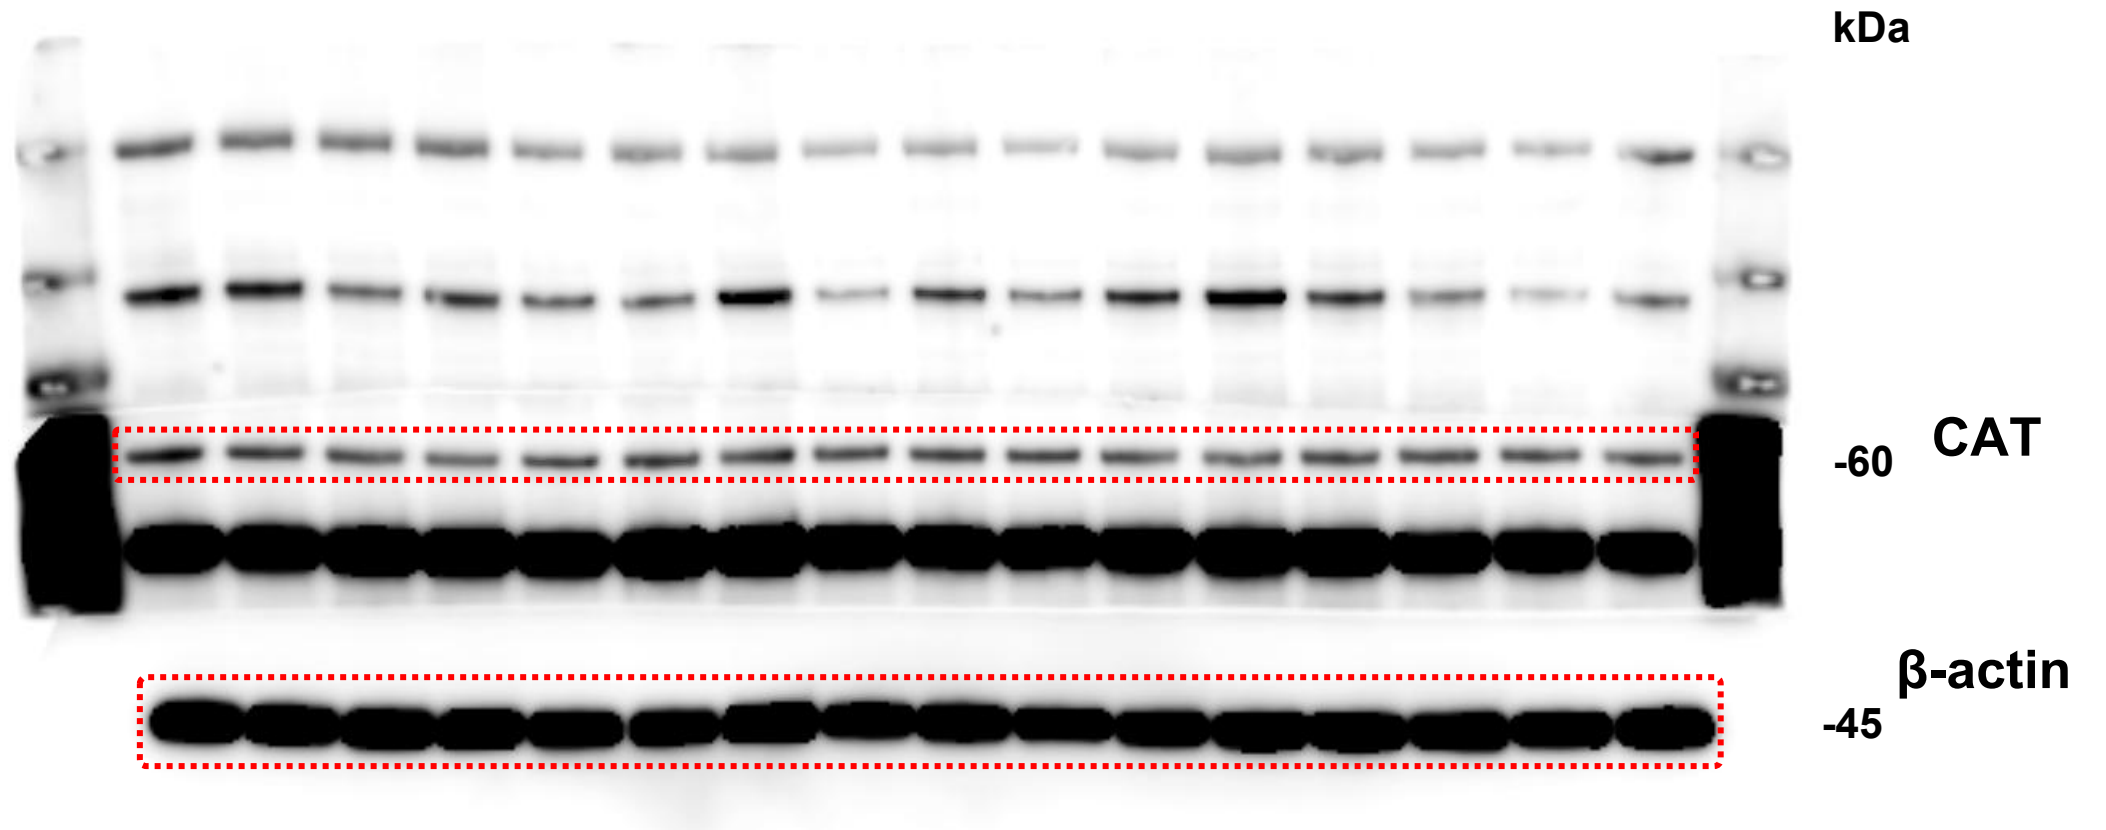

Note: 1. The same blot was used.  
2. Bands used in Figures are indicated by boxes in red outlines.

**Fig. S8F (GPX1-Full unedited blot)**

**$\beta$ -actin**

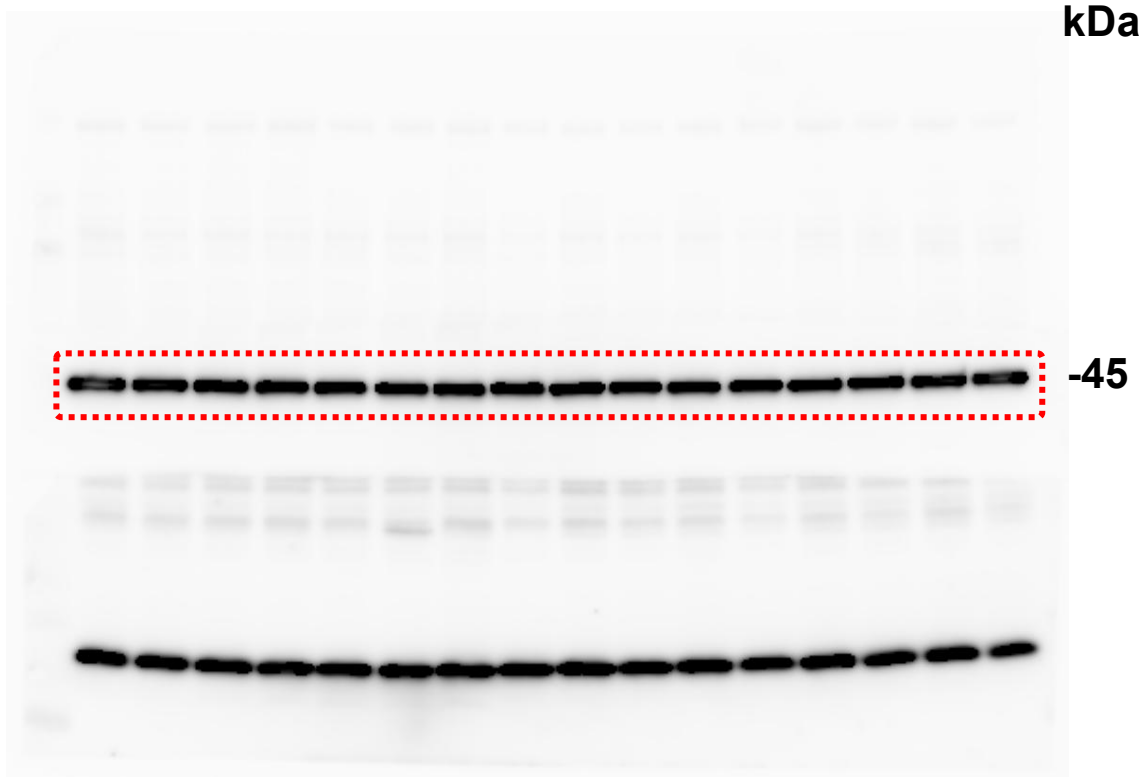

**GPX1**

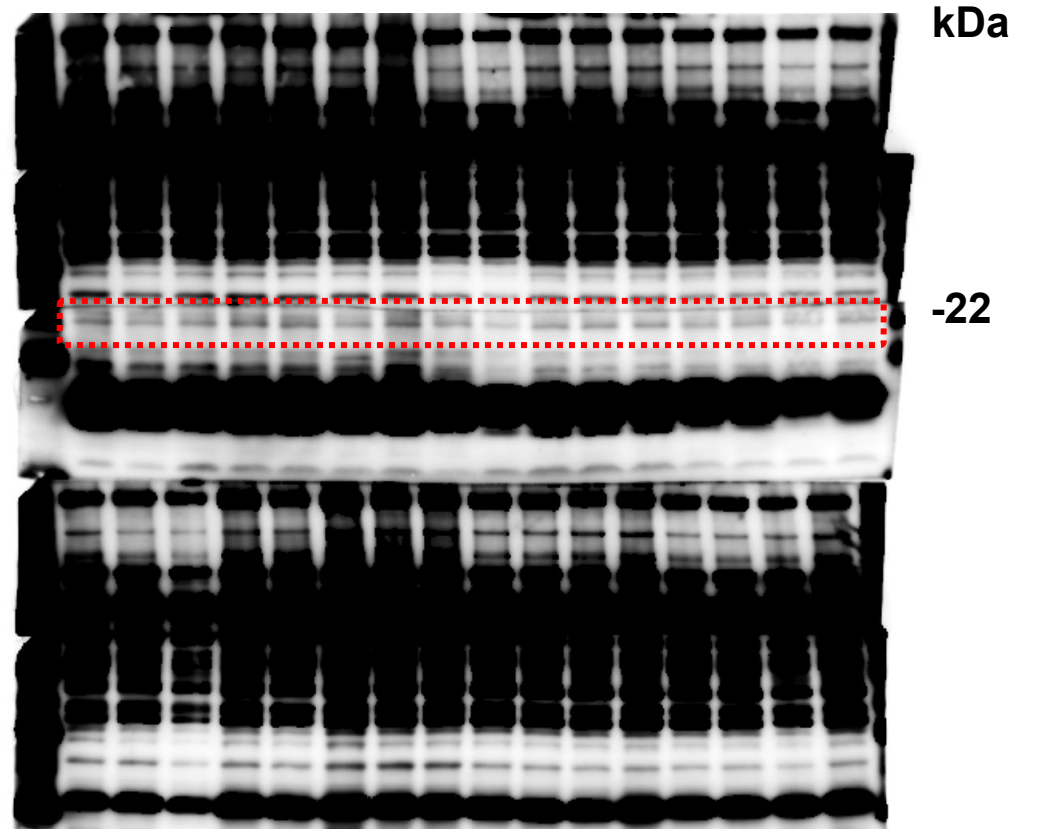

**Note: 1. The same blot and different exposure times (short and long exposures shown) were used.  
2. Bands used in Figures are indicated by boxes in red outlines.**

**Fig. S9F (Cleaved-caspase3/Caspase-3-Full unedited blot)**

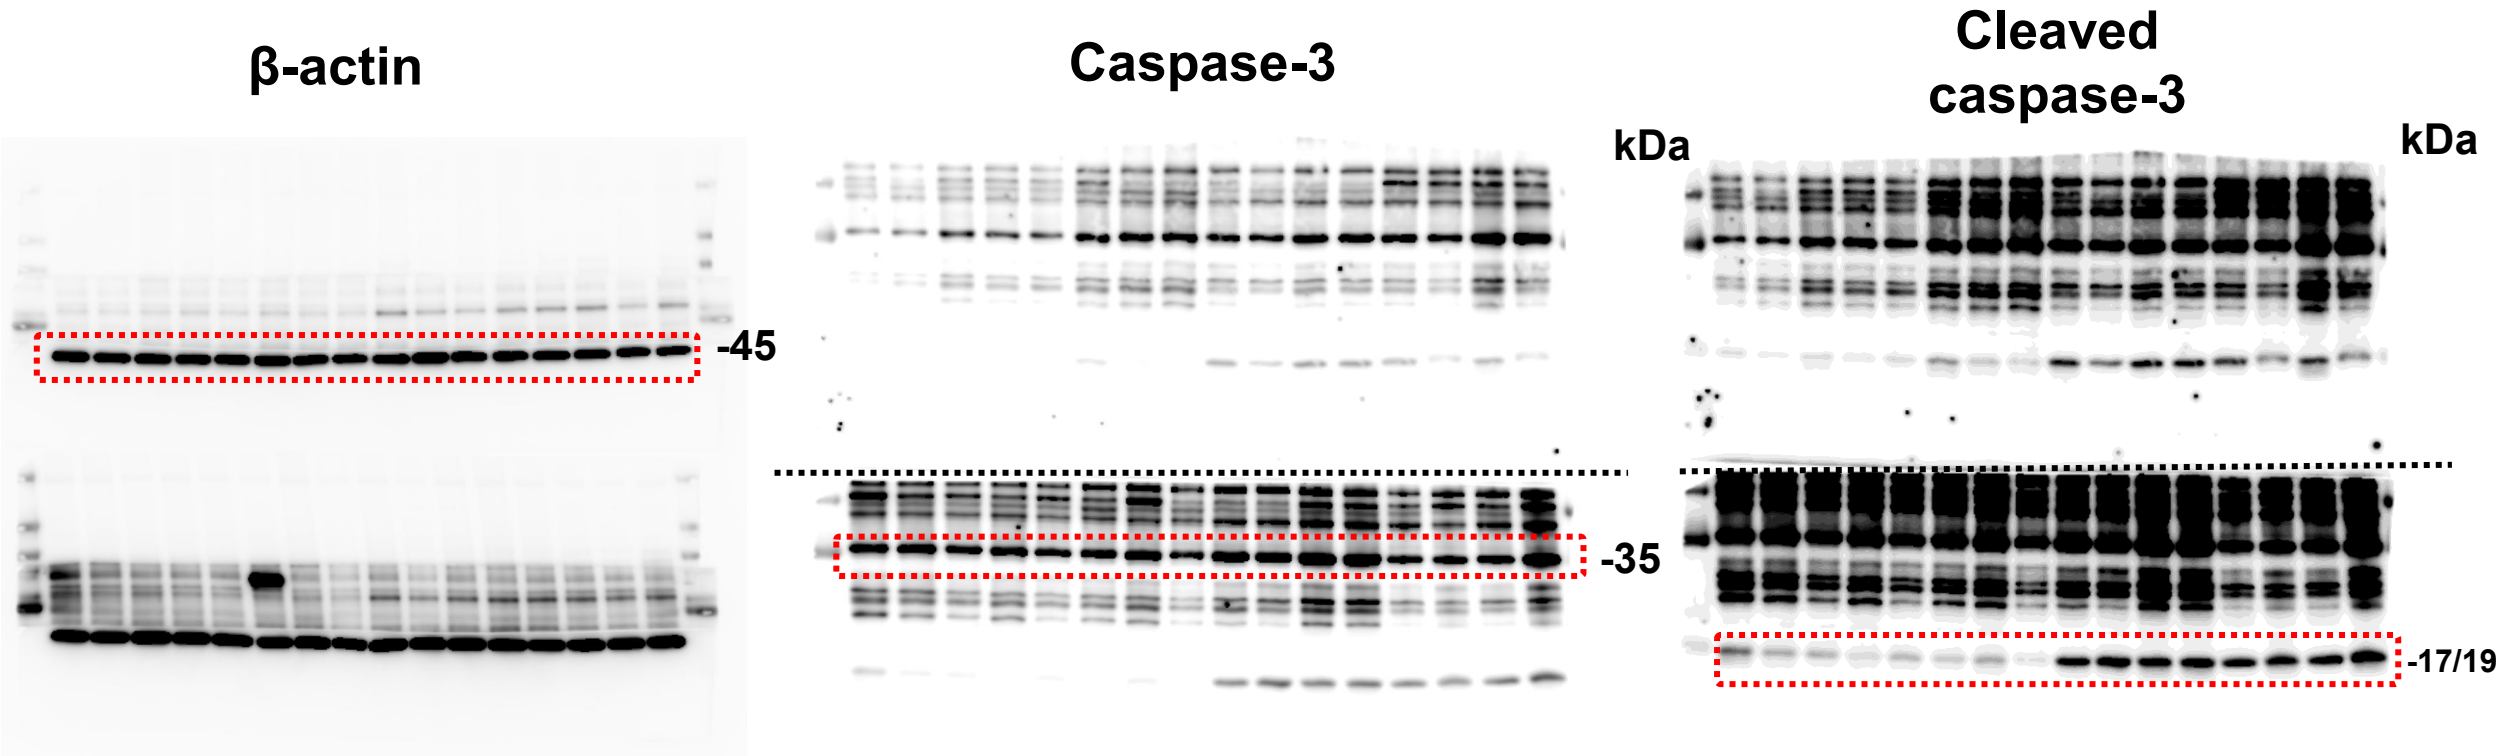

**Note: 1. In Cleaved caspase-3 and Caspase-3 expression, the same blot and different exposure times (short and long exposures shown) were used. Between Caspase-3 and  $\beta$ -actin expression, separate, noncontiguous lanes from the same samples were used for each antibody.**  
**2. Bands used in Figures are indicated by boxes in red outlines.**

**Fig. S9F (BAK-Full unedited blot)**

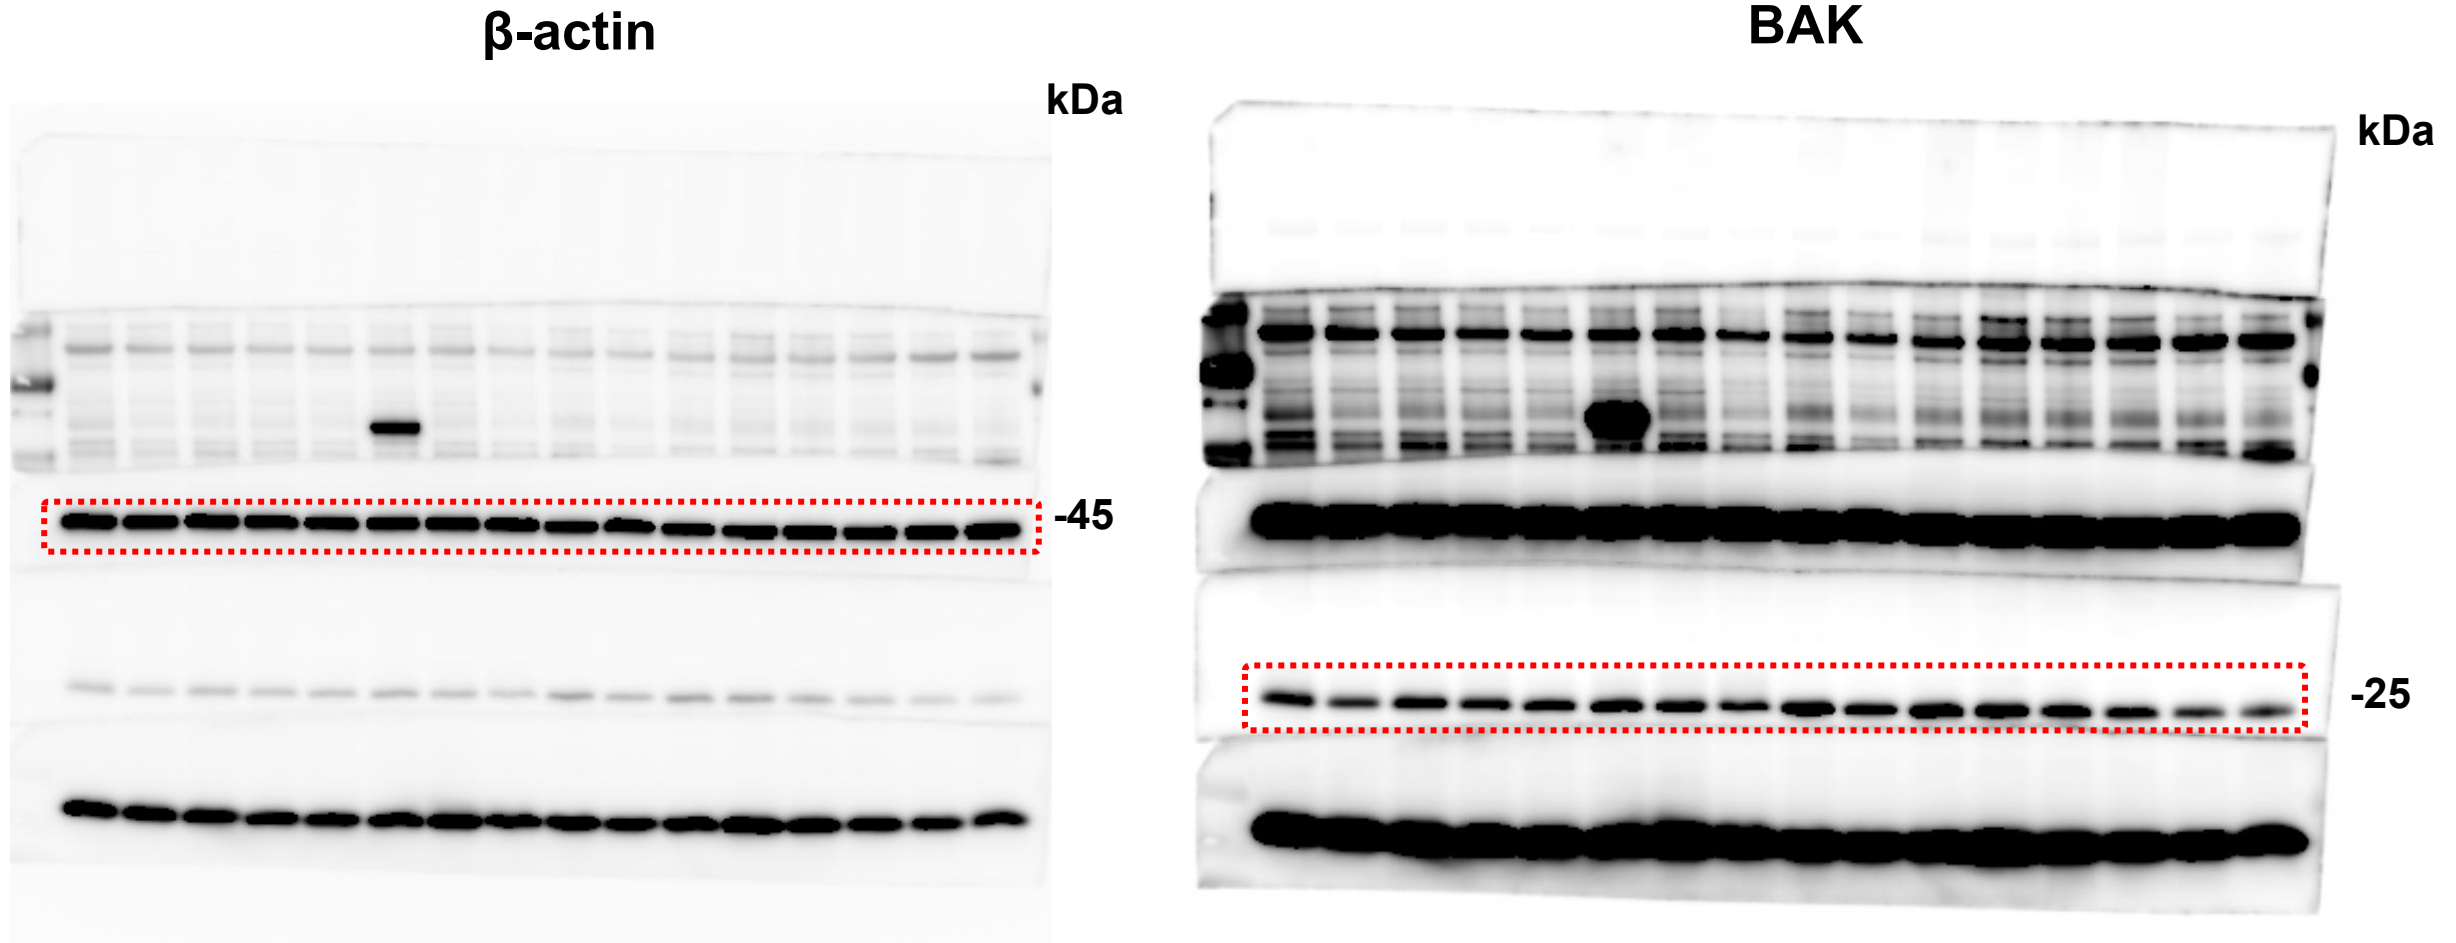

**Note: 1. The same blot and different exposure times (short and long exposures shown) were used.  
2. Bands used in Figures are indicated by boxes in red outlines.**

**Fig. S9F (BAX-Full unedited blot)**

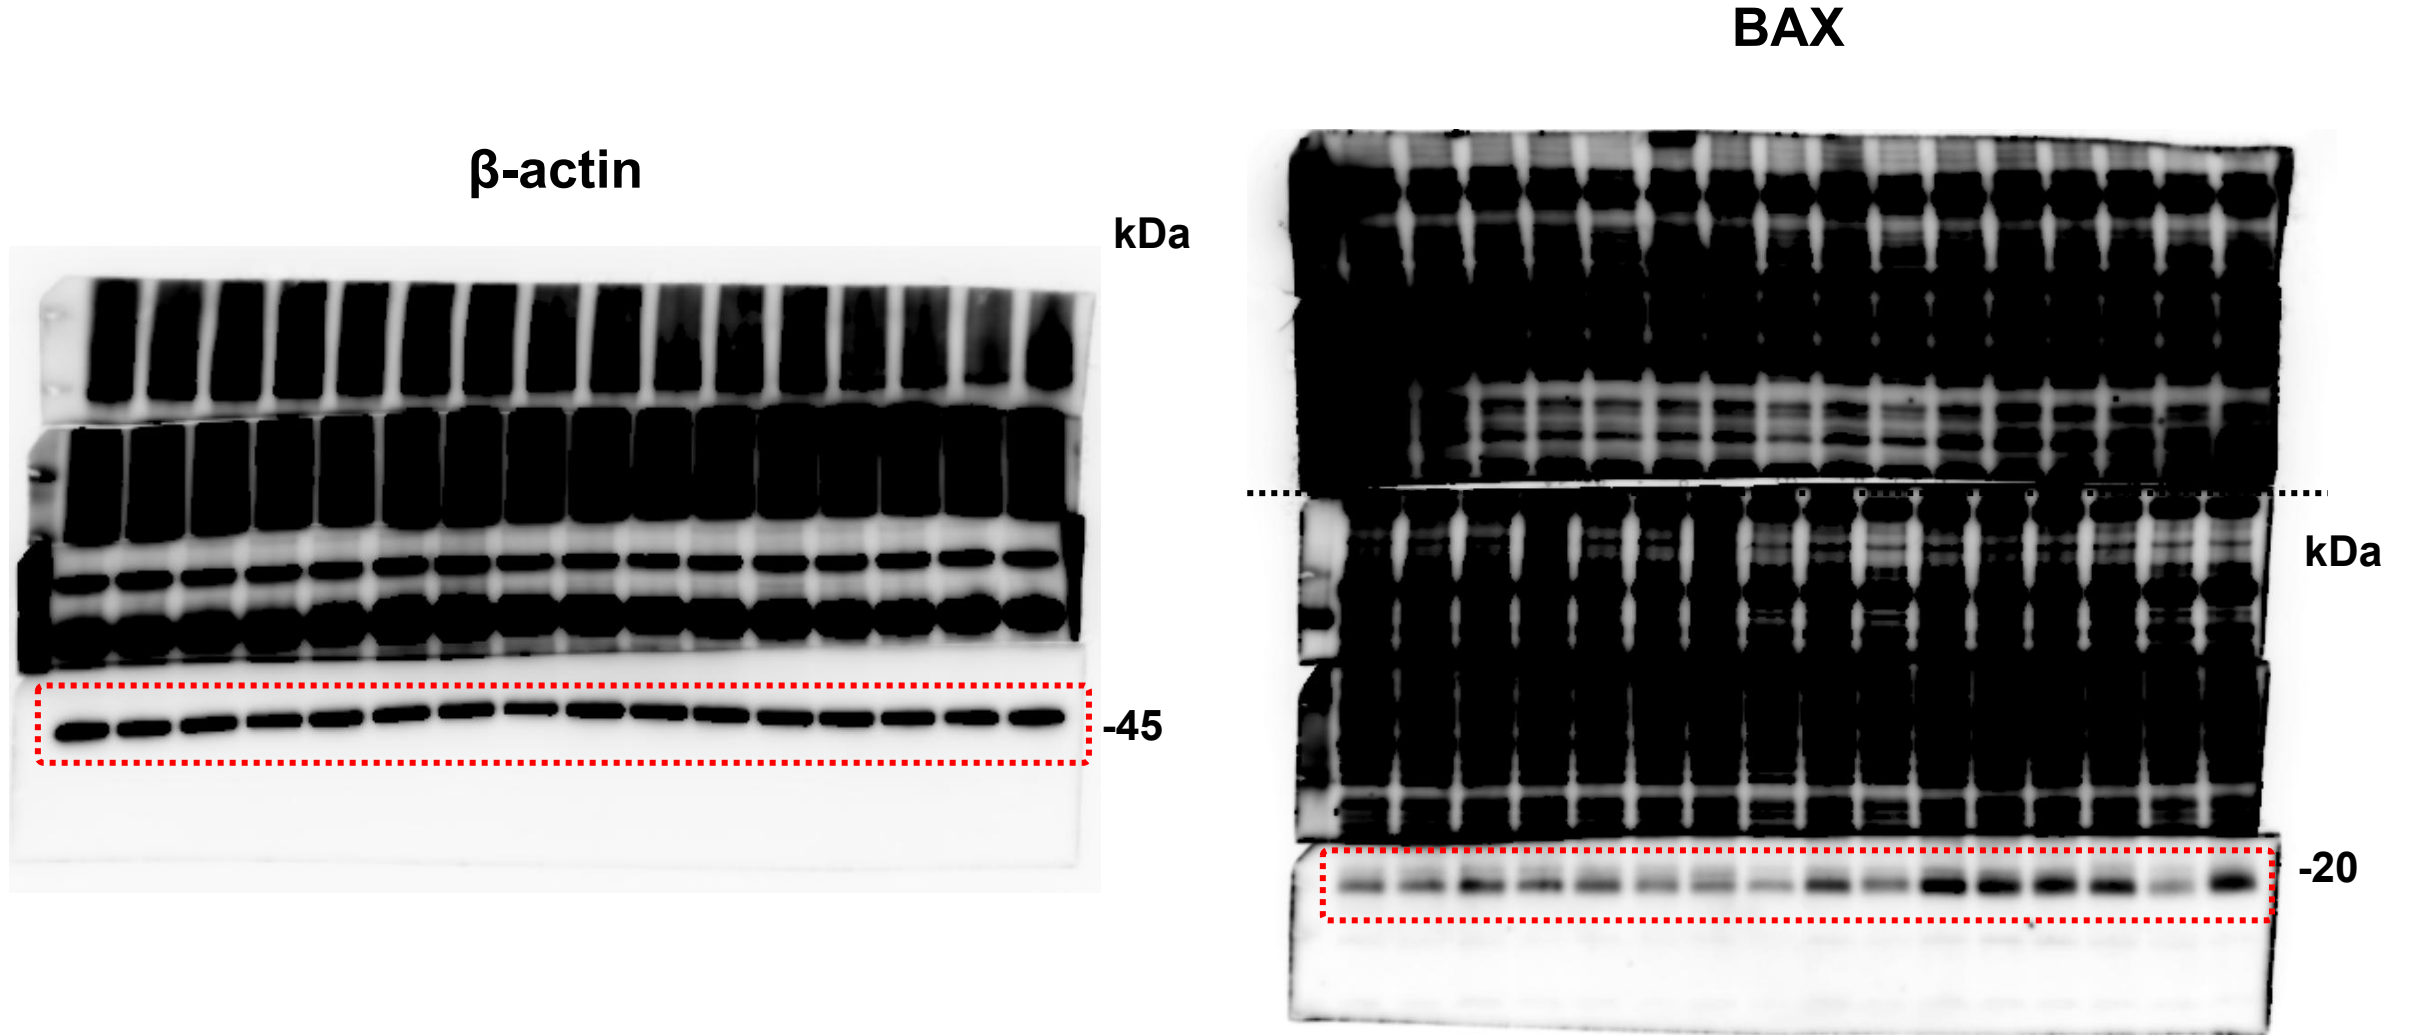

**Note: 1. Separate, noncontiguous lanes from the same samples were used for each antibody.  
2. Bands used in Figures are indicated by boxes in red outlines.**

# Fig. S9F (Cleaved-caspase-8/Caspase-8-Full unedited blot)

$\beta$ -actin

See Fig. S9F (BAK-Full unedited blot)

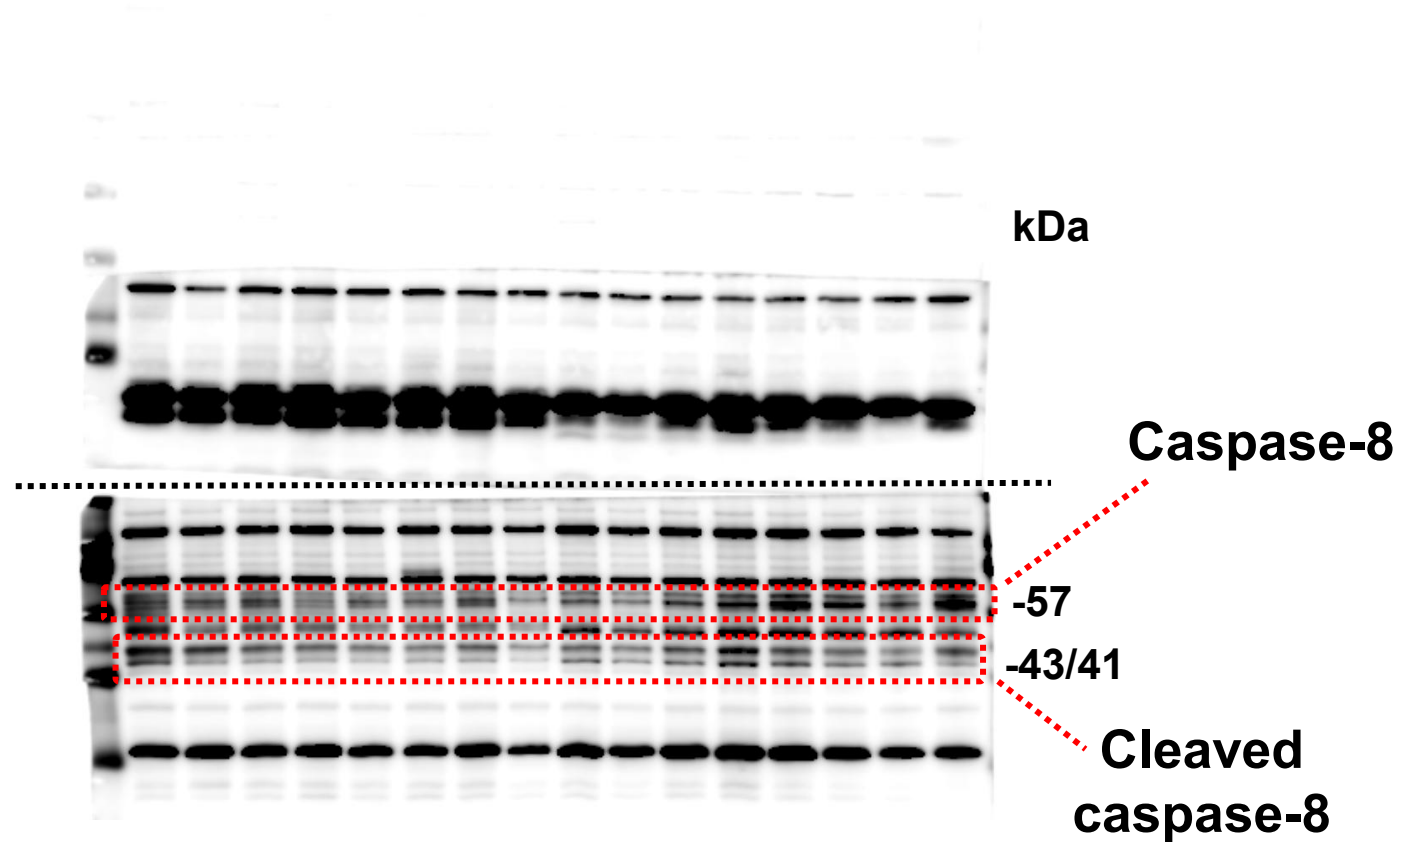

Note: 1. In Cleaved-caspase-8 and Caspase-8 expression, the same blot was used. Between Caspase-8 and  $\beta$ -actin expression, separate, noncontiguous lanes from the same samples were used for each antibody.  
2. Bands used in Figures are indicated by boxes in red outlines.

**Fig. S10 (LC3- II /LC3- I -Full unedited blot)**

**$\beta$ -actin**

**LC3**

**kDa**

**-45**

**LC3- I**

**-18**

**-16**

**LC3- II**

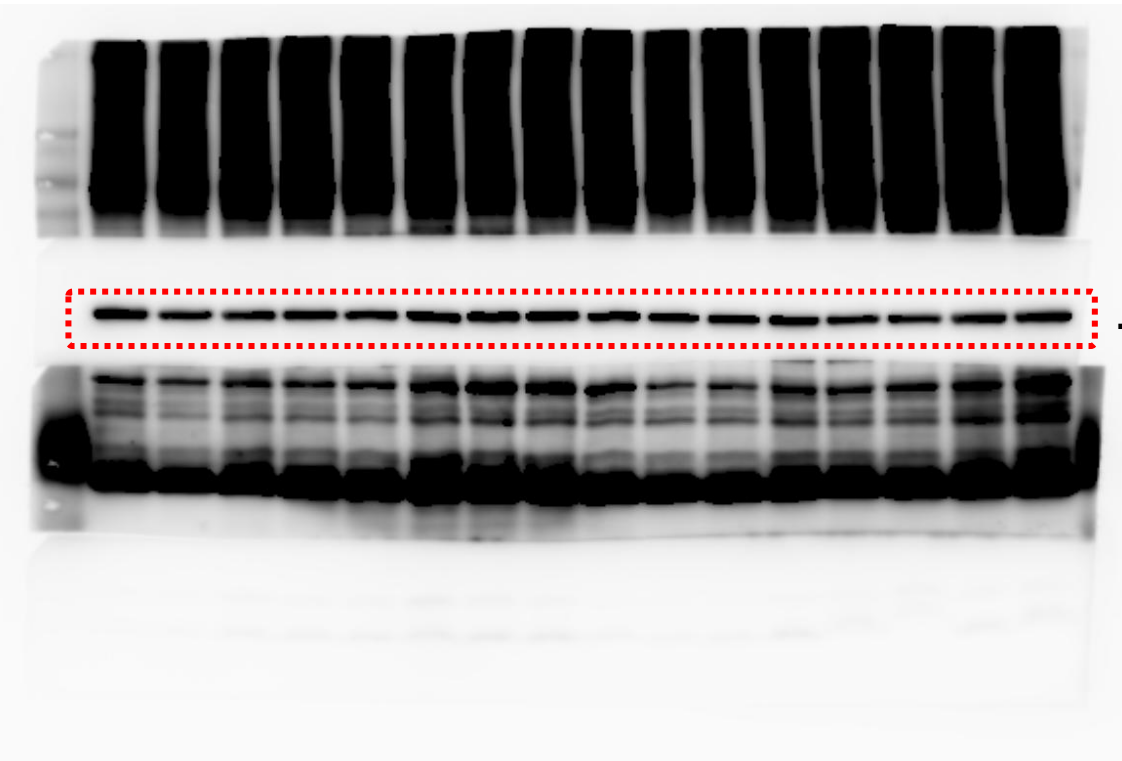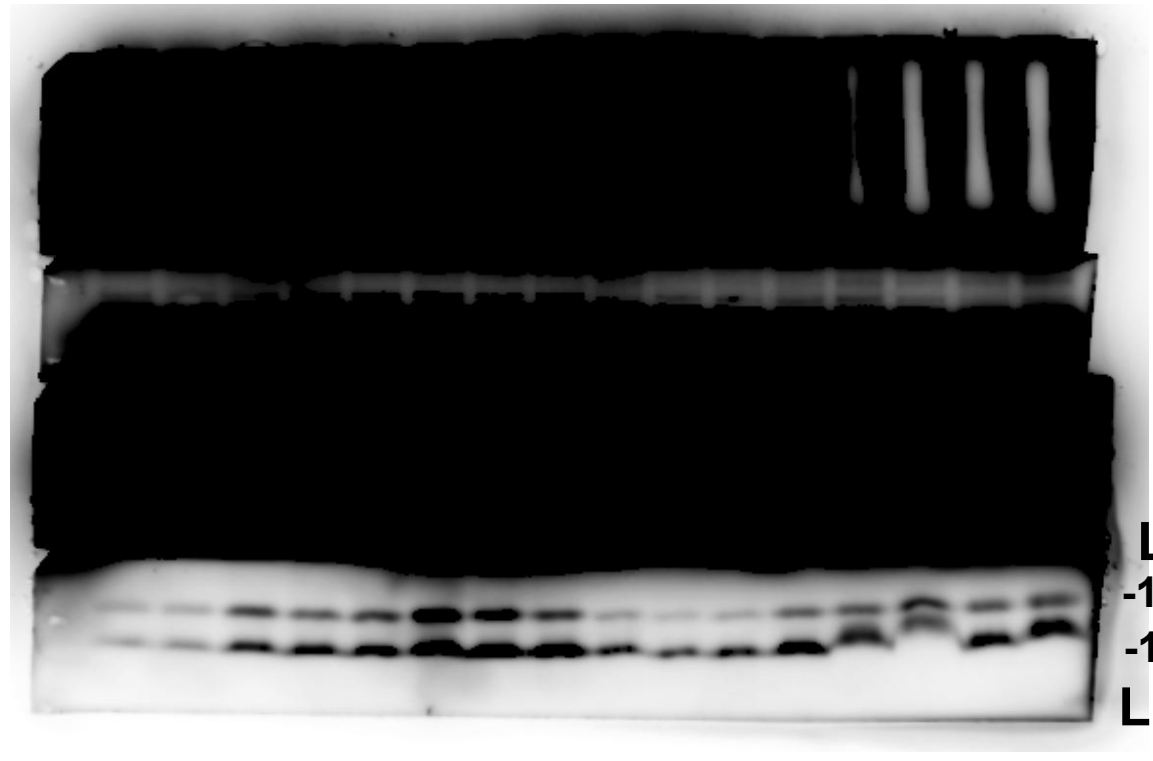

**Note: 1. In LC3- II and LC3- I expression, the same blot was used. Between LC3 and  $\beta$ -actin expression, the same blot and different exposure times (short and long exposures shown) were used.  
2. Bands used in Figures are indicated by boxes in red outlines.**

**Fig. S10 (p62-Full unedited blot)**

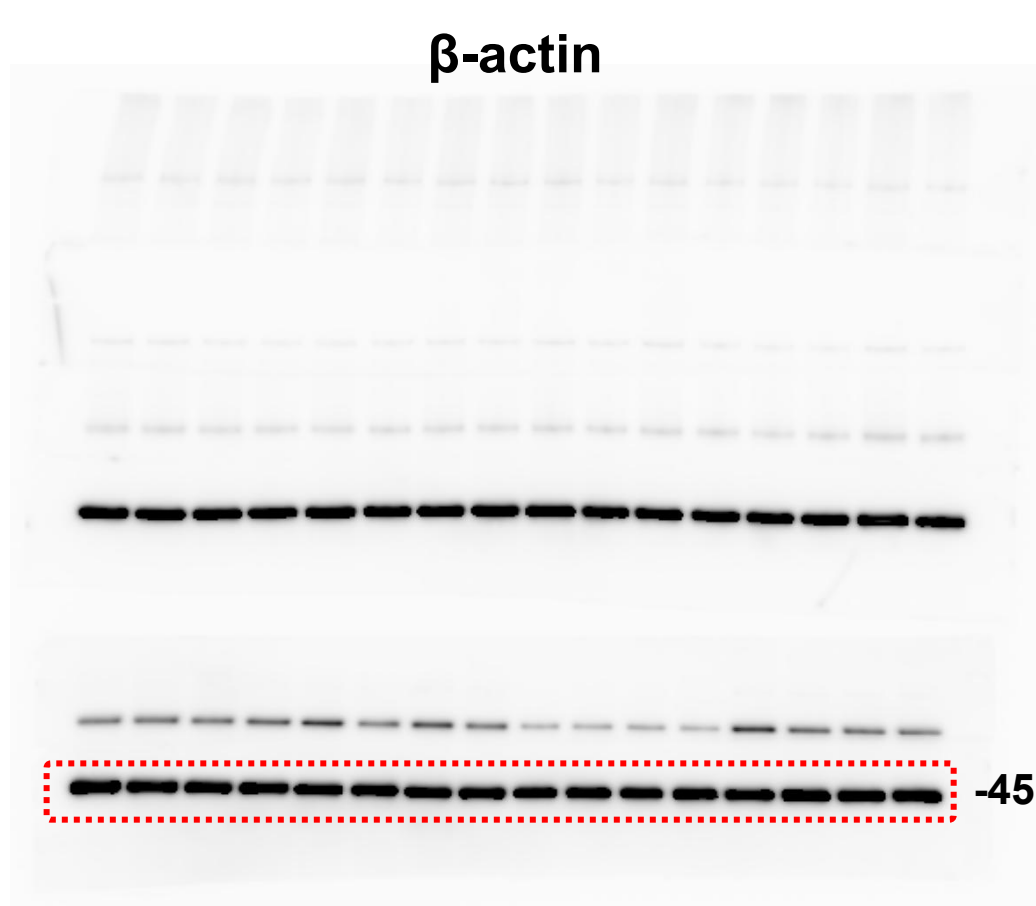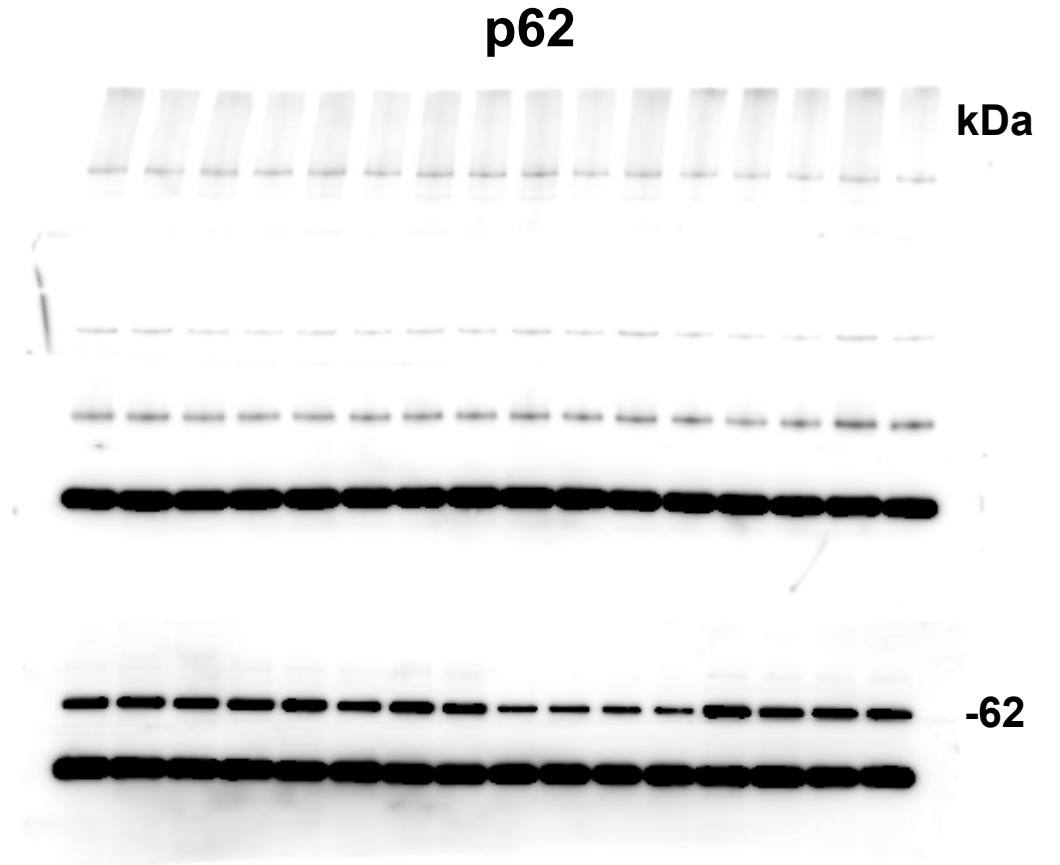

**Note: 1. The same blot and different exposure times (short and long exposures shown) were used.  
2. Bands used in Figures are indicated by boxes in red outlines.**
