# Supplementary material for: IL-10 attenuates metabolic dysfunction–associated steatotic liver disease via modulation of hepatic responses to lipotoxicity
Source: JCI journal article supplement (doi:10.1172/jci.insight.200231), 2026-04-23
Supplement: sd2 [file 2]

1 **Supplemental Material**

2 **Interleukin-10 attenuates metabolic dysfunction-associated steatotic liver**  
3 **disease via modulation of hepatic responses to lipotoxicity**

4

5

6

7 Akira Kado, Kazuya Okushin, Takeya Tsutsumi, Toshiyuki Kishida, Kazuhiko Ikeuchi,

8 Hiroshi Yotsuyanagi, Kyoji Moriya, Kazuhiko Koike, and Mitsuhiro Fujishiro

9

10

11

Table of contents

12

13 Supplementary table (Table S1) .....2

14 Supplementary figures (Fig. S1-6) .....3

15

16

## 17 Supplementary table

18 **Table S1.** Specific primary antibodies for western blot analysis

| Name                               | Host              | Dilution | Supplier            | Cat no.    |
|------------------------------------|-------------------|----------|---------------------|------------|
| IL10R $\alpha$                     | Mouse monoclonal  | 1:200    | Santa Cruz, USA     | sc-365374  |
| FAS                                | Rabbit monoclonal | 1:1000   | CST                 | 3180       |
| CPT1                               | Rabbit monoclonal | 1:1000   | CST                 | 12252      |
| CPT2                               | Rabbit monoclonal | 1:2000   | abcam, UK           | ab181114   |
| PPAR $\alpha$                      | Rabbit monoclonal | 1:1000   | abcam, UK           | ab126285   |
| GLUT2                              | Rabbit monoclonal | 1:200    | Santa Cruz, USA     | sc-9117    |
| GK                                 | Mouse monoclonal  | 1:200    | Santa Cruz, USA     | sc-17819   |
| GS                                 | Rabbit monoclonal | 1:1000   | CST                 | 3893       |
| Phospho-Glycogen Synthase (Ser641) | Rabbit monoclonal | 1:1000   | CST                 | 3891       |
| GP                                 | Rabbit monoclonal | 1:1000   | proteintech, USA    | 55429-1-AP |
| Phospho-PYGL (Ser15)               | Rabbit monoclonal | 1:1000   | Invitrogen          | PA5-114628 |
| PCK1                               | Rabbit monoclonal | 1:1000   | CST                 | 12940      |
| SOD1                               | Rabbit monoclonal | 1:1000   | proteintech, USA    | 10269-1-AP |
| SOD2                               | Rabbit monoclonal | 1:1000   | proteintech, USA    | 24127-1-AP |
| CAT                                | Rabbit monoclonal | 1:1000   | proteintech, USA    | 21260-1-AP |
| GPX1                               | Rabbit monoclonal | 1:1000   | proteintech, USA    | 29329-1-AP |
| BAK                                | Rabbit monoclonal | 1:1000   | CST                 | 12105      |
| BAX                                | Mouse monoclonal  | 1:2000   | BD Biosciences, USA | 556467     |
| Caspase 8                          | Mouse monoclonal  | 1:2000   | CST                 | 9746       |
| STAT3                              | Rabbit monoclonal | 1:1000   | CST                 | 12640      |
| p-STAT3                            | Rabbit monoclonal | 1:500    | CST                 | 9145       |
| AKT                                | Rabbit monoclonal | 1:1000   | CST                 | 9272       |
| p-AKT                              | Rabbit monoclonal | 1:500    | CST                 | 4060       |
| mTOR                               | Rabbit monoclonal | 1:1000   | CST                 | 2972       |
| p-mTOR                             | Rabbit monoclonal | 1:500    | CST                 | 2971       |
| LC3A/B (D3U4C)                     | Rabbit monoclonal | 1:1000   | CST                 | 13118      |
| SQSTM1/p62                         | Rabbit monoclonal | 1:1000   | CST                 | 8025       |
| $\beta$ -actin                     | Rabbit monoclonal | 1:1000   | CST                 | 44970      |

19  
20

21 **Supplementary figures**

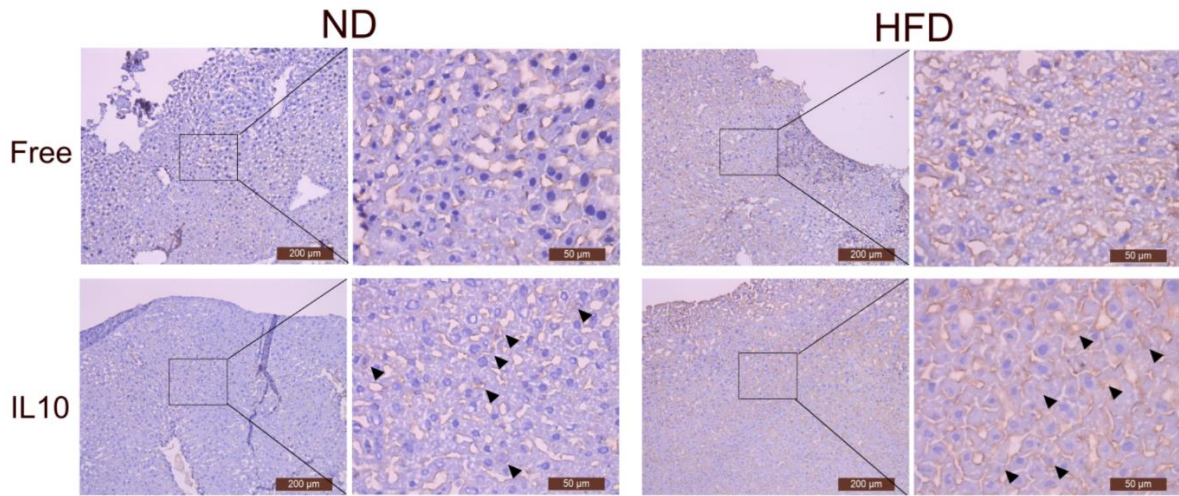

22  
23 **Fig. S1. Immunohistochemical staining of IL-10R $\alpha$  in liver tissue sections of ND- and**  
24 **HFD-fed mice.** Upper panel, no treatment; Lower panel, IL-10 treatment. Stronger staining is  
25 observed in the intracellular area of hepatocytes (arrowheads). The staining observed in  
26 perivascular regions of HFD-fed mice may reflect increased IL-10R $\alpha$  expression in non-  
27 parenchymal cells such as Kupffer cells and perivascular immune cells under hepatic  
28 inflammation. Scale bars = 200, 50  $\mu$ m. HFD, high-fat diet; ND, normal diet.

29  
30

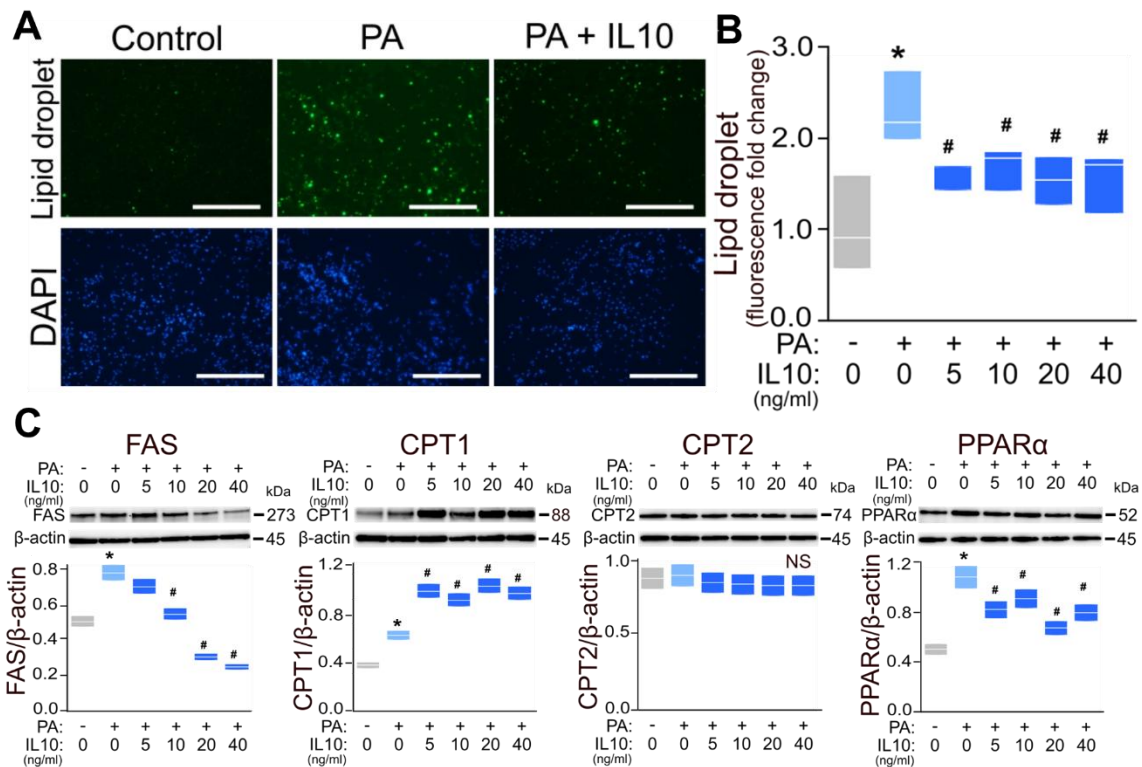

31

32

33

34

35

36

37

38

39

40

41

42

43

44

45

46

**Fig. S2. IL-10 regulates hepatocellular lipid accumulation in HepG2 cells (A-C).** HepG2 cells are incubated with DMEM and PA at increasing concentrations of 0, 5, 10, 20, and 40 ng/mL or with DMEM alone (control) for 24 h. (A) FMI of GFP channel (green, LD) and DAPI channel (blue) in HepG2 cells. Immunocytochemistry is performed using an anti-GFP antibody for LD detection, and subcellular localization following UV irradiation is captured using FMI. The upper panel displays raw images acquired in the GFP channel, while the lower panel shows the corresponding DAPI channel. Scale bar = 1000  $\mu$ m. (B) Cellular LD accumulation is quantified using FMI, and relative fold changes compared to the control are examined. (C) Immunoblot analysis of FAS, CPT1, CPT2, and PPAR $\alpha$ . Protein band intensities are normalized to  $\beta$ -actin and expressed as ratios. Data are presented as box-and-whisker plots showing the median, interquartile range, and full data range. One-way ANOVA followed by Tukey's multiple-comparisons test;  $n = 3$ , \* $p < 0.05$  versus non-PA and IL-10 0 ng/mL (control); # $p < .05$  versus PA and IL-10 0 ng/mL. LD, lipid droplet; PA, palmitic acid.

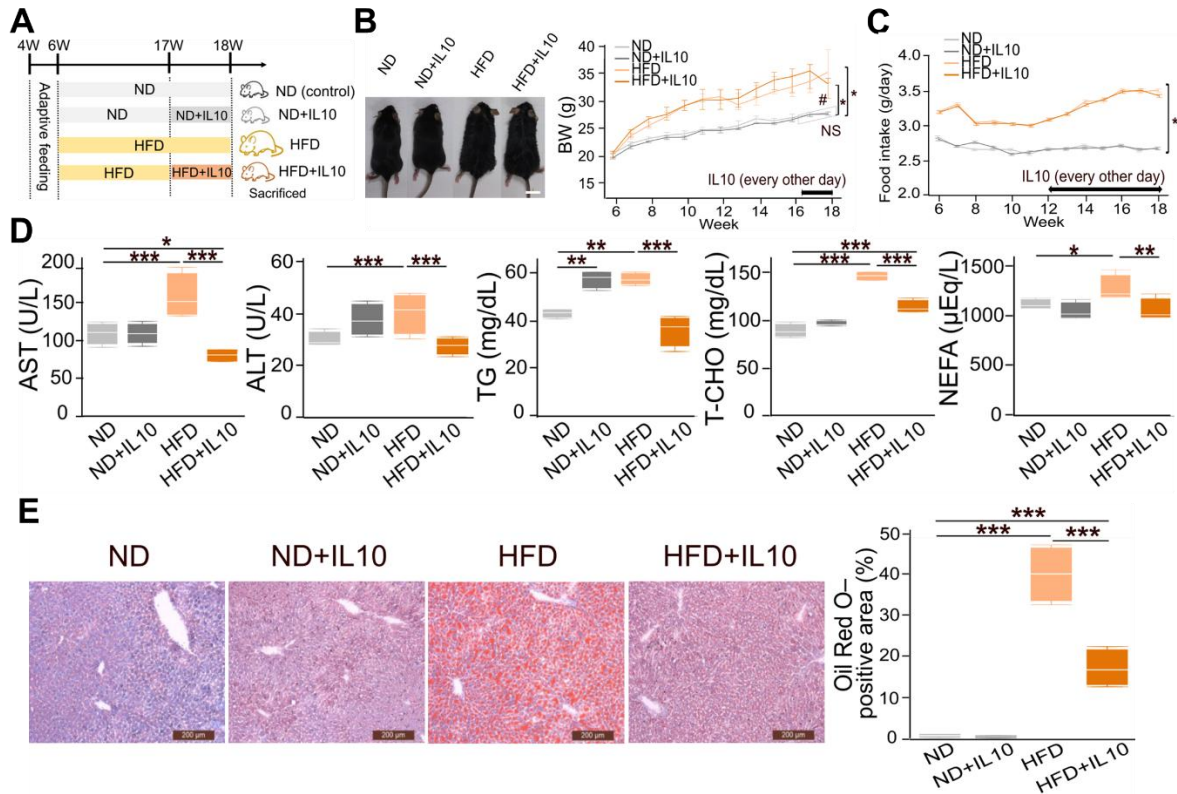

47

48 **Fig. S3. Short-term IL-10 treatment suppresses hepatic lipid accumulation in HFD-fed**

49 **mice.** (A) Following adaptive feeding, mice are fed either an ND or HFD for 12 weeks and

50 subsequently treated with or without IL-10 once every 2 days for 1 week before sacrifice. (B)

51 Representative images of mice from four experimental groups (ND, ND + IL-10, HFD, and

52 HFD + IL-10) are captured before sacrifice, and BWs in each group are monitored and

53 recorded. Data are presented as box-and-whisker plots showing the median, interquartile

54 range, and full data range. One-way ANOVA followed by Tukey's multiple-comparisons

55 test;  $n = 4$ ,  $*p < 0.05$  versus ND-fed mice (control);  $\#p < 0.05$  versus HFD-fed mice. Scale bar

56 = 2 cm. (C) Food intake in each group. Food intake is monitored throughout the treatment

57 period and expressed as mean [g/day] per mouse (D) Fasting serum levels of AST, ALT, TG,

58 T-CHO, and NEFA are measured at sacrifice. (E) Oil Red O staining is performed on liver

59 tissue sections, and the Oil Red O-positive area (%) in each view is quantified. Scale bar =

60 200  $\mu\text{m}$ . The analysis is performed four times per group using different views. Blood

61 biochemistry and immunoblot data are presented as box-and-whisker plots showing the

62 median, interquartile range, and full data range. One-way ANOVA followed by Tukey's

63 multiple-comparisons test;  $n = 4$ ,  $*p < 0.05$ ,  $**p < 0.01$ ,  $***p < 0.001$ . BW, body weight; CPT,

64 carnitine palmitoyltransferase; FAS, fatty acid synthase; HFD, high-fat diet; LD, lipid

65 droplet; ND, normal diet; PPAR, peroxisome proliferator-activated receptor.

66

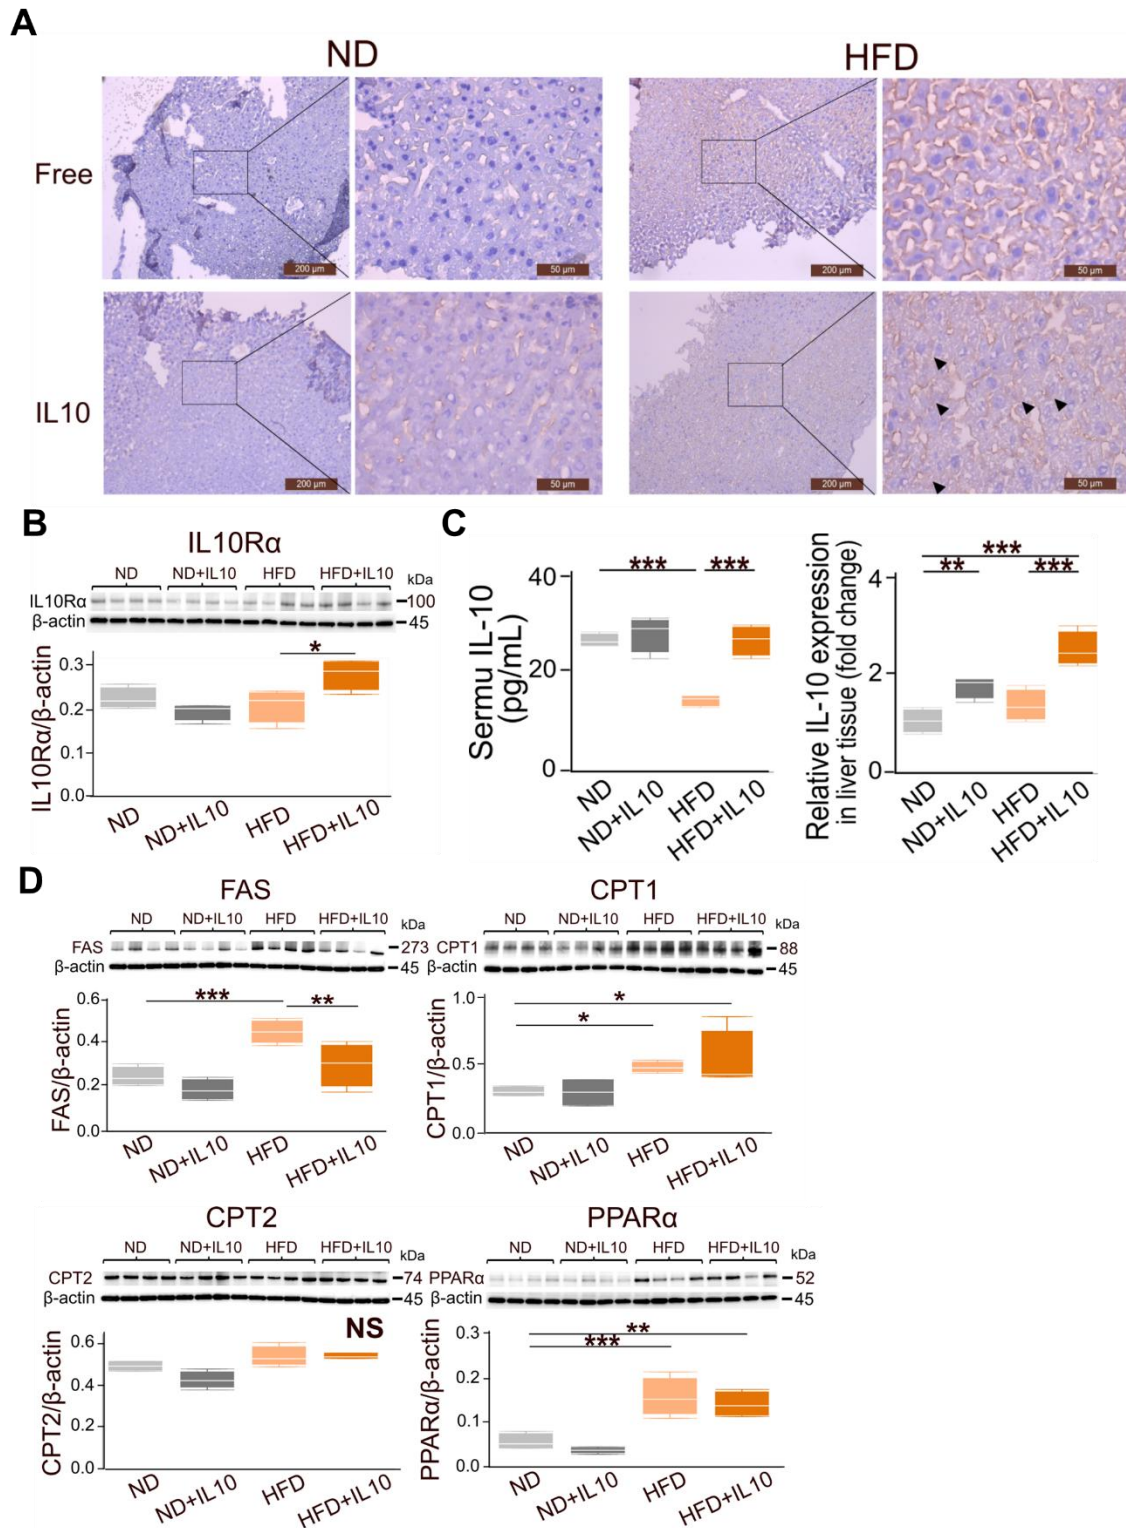

67

68 **Fig. S4. Short-term IL-10 treatment promotes IL-10 and IL-10Rα expression and**  
 69 **suppresses hepatic fatty acid synthase in HFD-fed mice. (A)** Immunohistochemical  
 70 staining of IL-10Rα in liver tissue sections of ND- and HFD-fed mice. Upper panel, no  
 71 treatment; lower panel, IL-10 treatment. Stronger staining is observed in the intracellular area  
 72 of hepatocytes (arrowheads). Scale bars = 200, 50 μm. (B) Immunoblot analysis of IL10Rα.

73 Protein band intensities are normalized to  $\beta$ -actin and expressed as ratios. (C) Serum IL-10  
74 levels at sacrifice and quantitative hepatic IL-10 levels and relative fold changes compared to  
75 control. (D) Immunoblot analysis of FAS, CPT1, CPT2, and PPAR $\alpha$ . Protein band intensities  
76 are normalized to  $\beta$ -actin and expressed as ratios. Immunoblot data are presented as box-and-  
77 whisker plots showing the median, interquartile range, and full data range. One-way ANOVA  
78 followed by Tukey's multiple-comparisons test; n = 4, \* $p$ <0.05, \*\* $p$ <0.01, \*\*\* $p$ <0.001.  
79 CPT, carnitine palmitoyltransferase; FAS, fatty acid synthase; HFD, high-fat diet; ND,  
80 normal diet; PPAR, peroxisome proliferator-activated receptor.

81

82

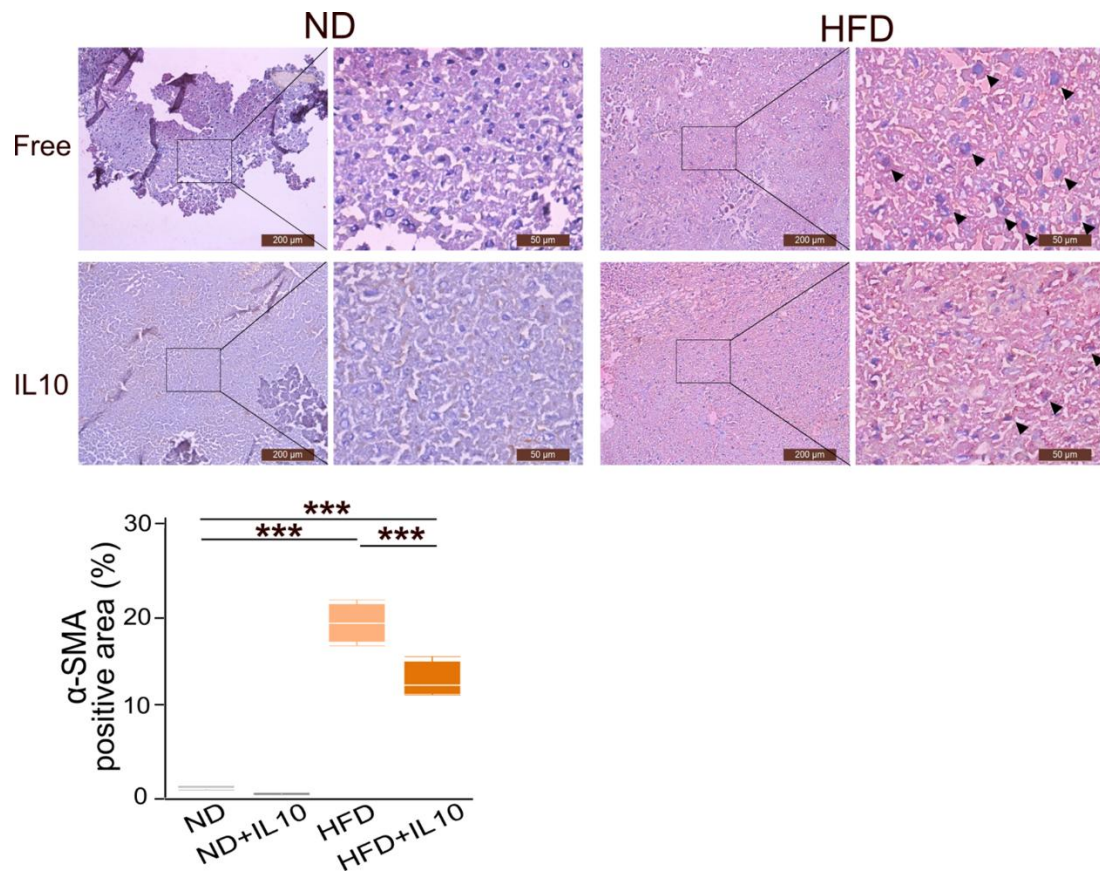

83

84 **Fig. S5. IL-10 attenuates  $\alpha$ -SMA-positive fibrogenic cell activation in HFD-fed mice.**

85 Representative liver sections from ND and HFD mice with or without IL-10 treatment are  
 86 subjected to double immunostaining for IL-10R $\alpha$  (DAB, brown) and  $\alpha$ -SMA (Alkaline  
 87 Phosphatase substrate, red), with hematoxylin counterstain (blue). Upper panel, no treatment;  
 88 lower panel, IL-10 treatment. Stronger  $\alpha$ -SMA staining is observed in the intracellular area of  
 89 hepatocytes (arrowheads).  $\alpha$ -SMA-positive area (%) is quantified using ImageJ in multiple  
 90 fields per mouse and summarized as box-and-whisker plots. Scale bars = 200, 50  $\mu$ m. HFD,  
 91 high-fat diet; ND, normal diet. One-way ANOVA followed by Tukey's multiple-comparisons  
 92 test; n = 4, \*p<0.05, \*\*p<0.01, \*\*\*p<0.001. HFD, high-fat diet; ND, normal diet.

93

94

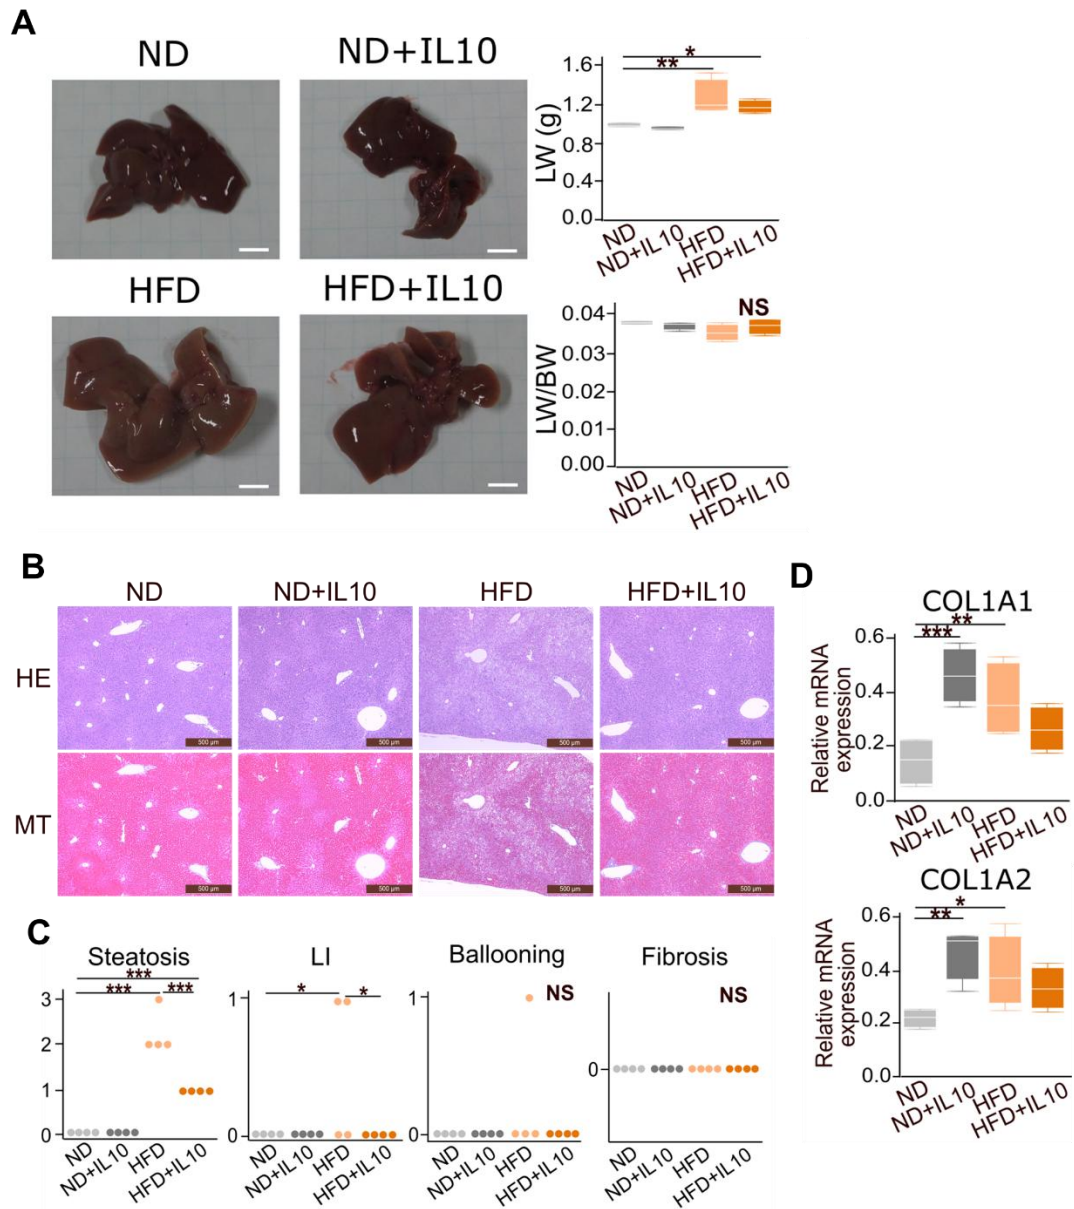

95

96 **Fig. S6. Short-term IL-10 treatment provides hepatic histological improvement in HFD-**

97 **fed mice.** (A) Representative images of mouse livers from four experimental groups are

98 captured after sacrifice. LWs in each group are recorded, and the LW/BW ratio is calculated.

99 Scale bar = 5 mm. (B) HE and MT staining are performed to evaluate liver histology. Scale

100 bar = 500  $\mu$ m. (C) Hepatic steatosis, LI, hepatocyte ballooning, and fibrosis staging are

101 analyzed. (D) mRNA expression levels in *COL1A1* and *COL1A2* are examined. They are

102 quantified and normalized to *GAPDH*. Data are presented as box-and-whisker plots showing

103 the median, interquartile range, and full data range. One-way ANOVA followed by Tukey's

104 multiple-comparisons test; n = 4, \* $p$ <0.05, \*\* $p$ <0.01, \*\*\* $p$ <0.001. BW, body weight; HFD,

105 high-fat diet; LI, lobular inflammation; LW, liver weight; ND, normal diet.

106

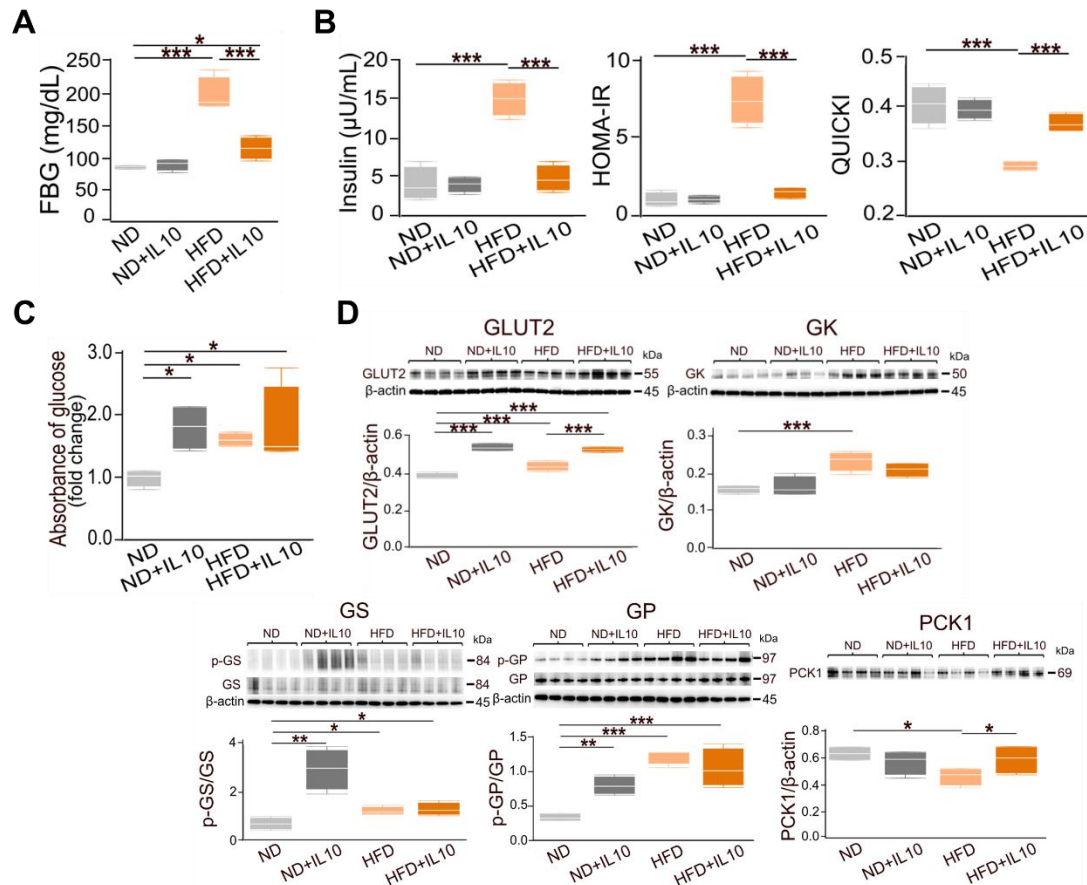

107

108

109

110

111

112

113

114

115

116

117

118

119

120

121

**Fig. S7. Short-term IL-10 treatment also promotes hepatic glucose content in HFD-fed mice.** (A) FBG levels are measured at sacrifice. (B) Fasting serum insulin levels, HOMA-IR, and QUICKI in each group. QUICKI is calculated from fasting glucose (G0) and insulin (I0) as  $QUICKI = 1/[\log(I0) + \log(G0)]$ . (C) Hepatic glucose content is quantified using absorption spectroscopy, and relative fold changes compared to the control are examined. (D) Immunoblot analysis of GLUT2, GK, GS, GP, and PCK1.  $\beta$ -actin loading control for GK was obtained from the same gel with PCK1. Protein band intensities are normalized to  $\beta$ -actin and expressed as ratios. Data are presented as box-and-whisker plots showing the median, interquartile range, and full data range. One-way ANOVA followed by Tukey's multiple-comparisons test;  $n = 4$ ,  $*p < 0.05$  versus ND-fed mice (control);  $\#p < 0.05$  versus HFD-fed mice. GLUT2, glucose transporter 2; GK, glucokinase; GP, glycogen phosphorylase; GS, glycogen synthase; HFD, high-fat diet; HOMA-IR, homeostatic model assessment for IR; IR, insulin resistance; ND, normal diet; PCK1, phosphoenolpyruvate carboxykinase 1.

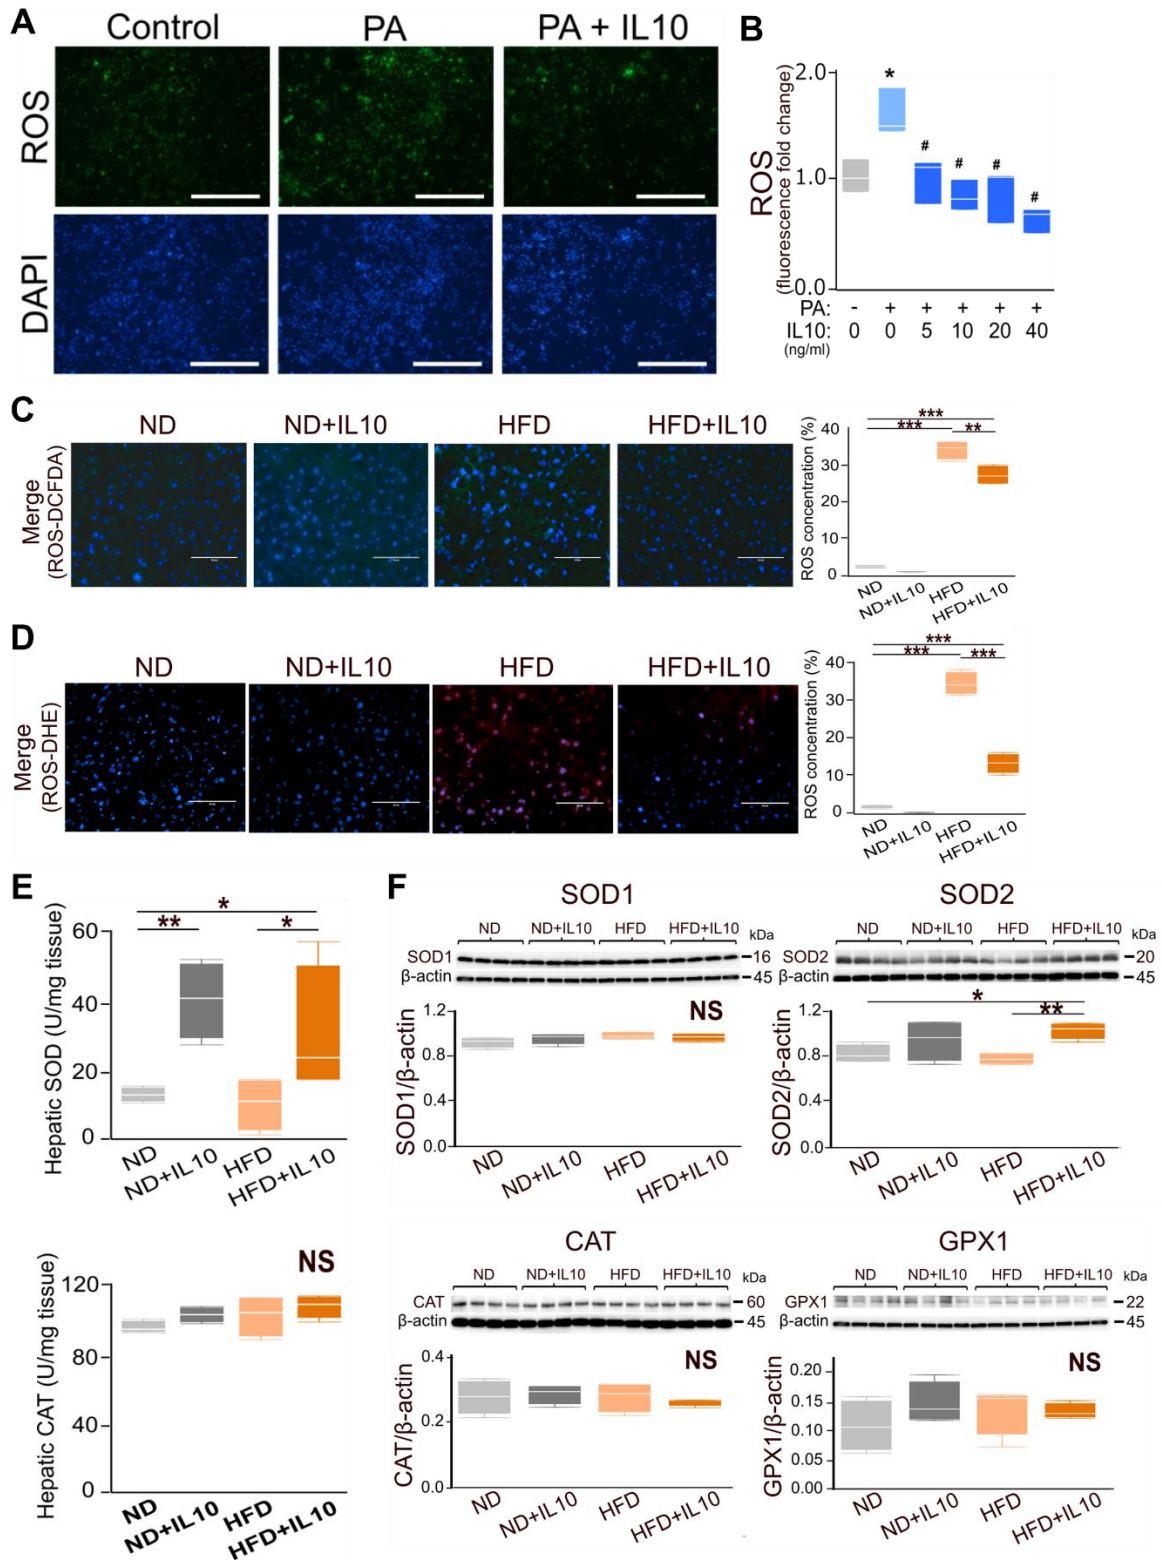

122

123 **Fig. S8. Short-term IL-10 treatment suppresses hepatic oxidative stress in HepG2 cells.**

124 (A) FMI of GFP channel (green, ROS) and DAPI channel (blue) HepG2 cells.

125 Immunocytochemistry is performed using an anti-GFP antibody for ROS detection, and

126 subcellular localization following UV irradiation is captured using FMI. The upper panel

127 displays raw images acquired in the GFP channel, while the lower panel shows the

128 corresponding DAPI channel. Scale bar = 1000  $\mu$ m. (B) Cellular ROS accumulation is  
129 quantified using FMI, and relative fold changes compared to the control are examined. Data  
130 are presented as box-and-whisker plots showing the median, interquartile range, and full data  
131 range. One-way ANOVA followed by Tukey's multiple-comparisons test;  $n = 3$ ,  $*p < 0.05$   
132 versus non-PA and IL-10 0 ng/mL (control);  $\#p < 0.05$  versus PA and IL-10 0 ng/mL. (C) FMI  
133 of the merged channel, a pseudo-colored overlay of GFP (green, ROS) and DAPI (blue)  
134 channels in liver tissues from four experimental groups. Immunohistochemistry is performed  
135 using an anti-GFP antibody for ROS detection, and subcellular localization following UV  
136 irradiation is captured using FMI. Scale bar = 50  $\mu$ m. Hepatic ROS levels are quantitatively  
137 assessed using FMI, and the ROS-positive area (%) in each view is examined. The analysis is  
138 performed four times per group using different views. (D) FMI of the merged channel from  
139 the RFP (red, DHE) and DAPI (blue) channels, showing liver tissues from four experimental  
140 groups. Nuclear ROS localization is shown with red fluorescence. Scale bar = 50  $\mu$ m.  
141 Quantitative evaluation of ROS is as described above. (E) Hepatic total SOD and catalase  
142 activities measured in liver homogenates (normalized to tissue/protein as indicated). Data are  
143 expressed as U/mg tissue. (F) Immunoblot analysis of SOD1, SOD2, CAT, and GPX. Protein  
144 band intensities are normalized to  $\beta$ -actin and expressed as ratios. Data are presented as box-  
145 and-whisker plots showing the median, interquartile range, and full data range. One-way  
146 ANOVA followed by Tukey's multiple-comparisons test;  $n = 4$ ,  $*p < 0.05$ ,  $**p < 0.01$ ,  
147  $***p < 0.001$ . CAT, catalase; GPX, glutathione peroxidase; HFD, high-fat diet; ND, normal  
148 diet; ROS, reactive oxygen species; SOD, superoxide dismutase.  
149

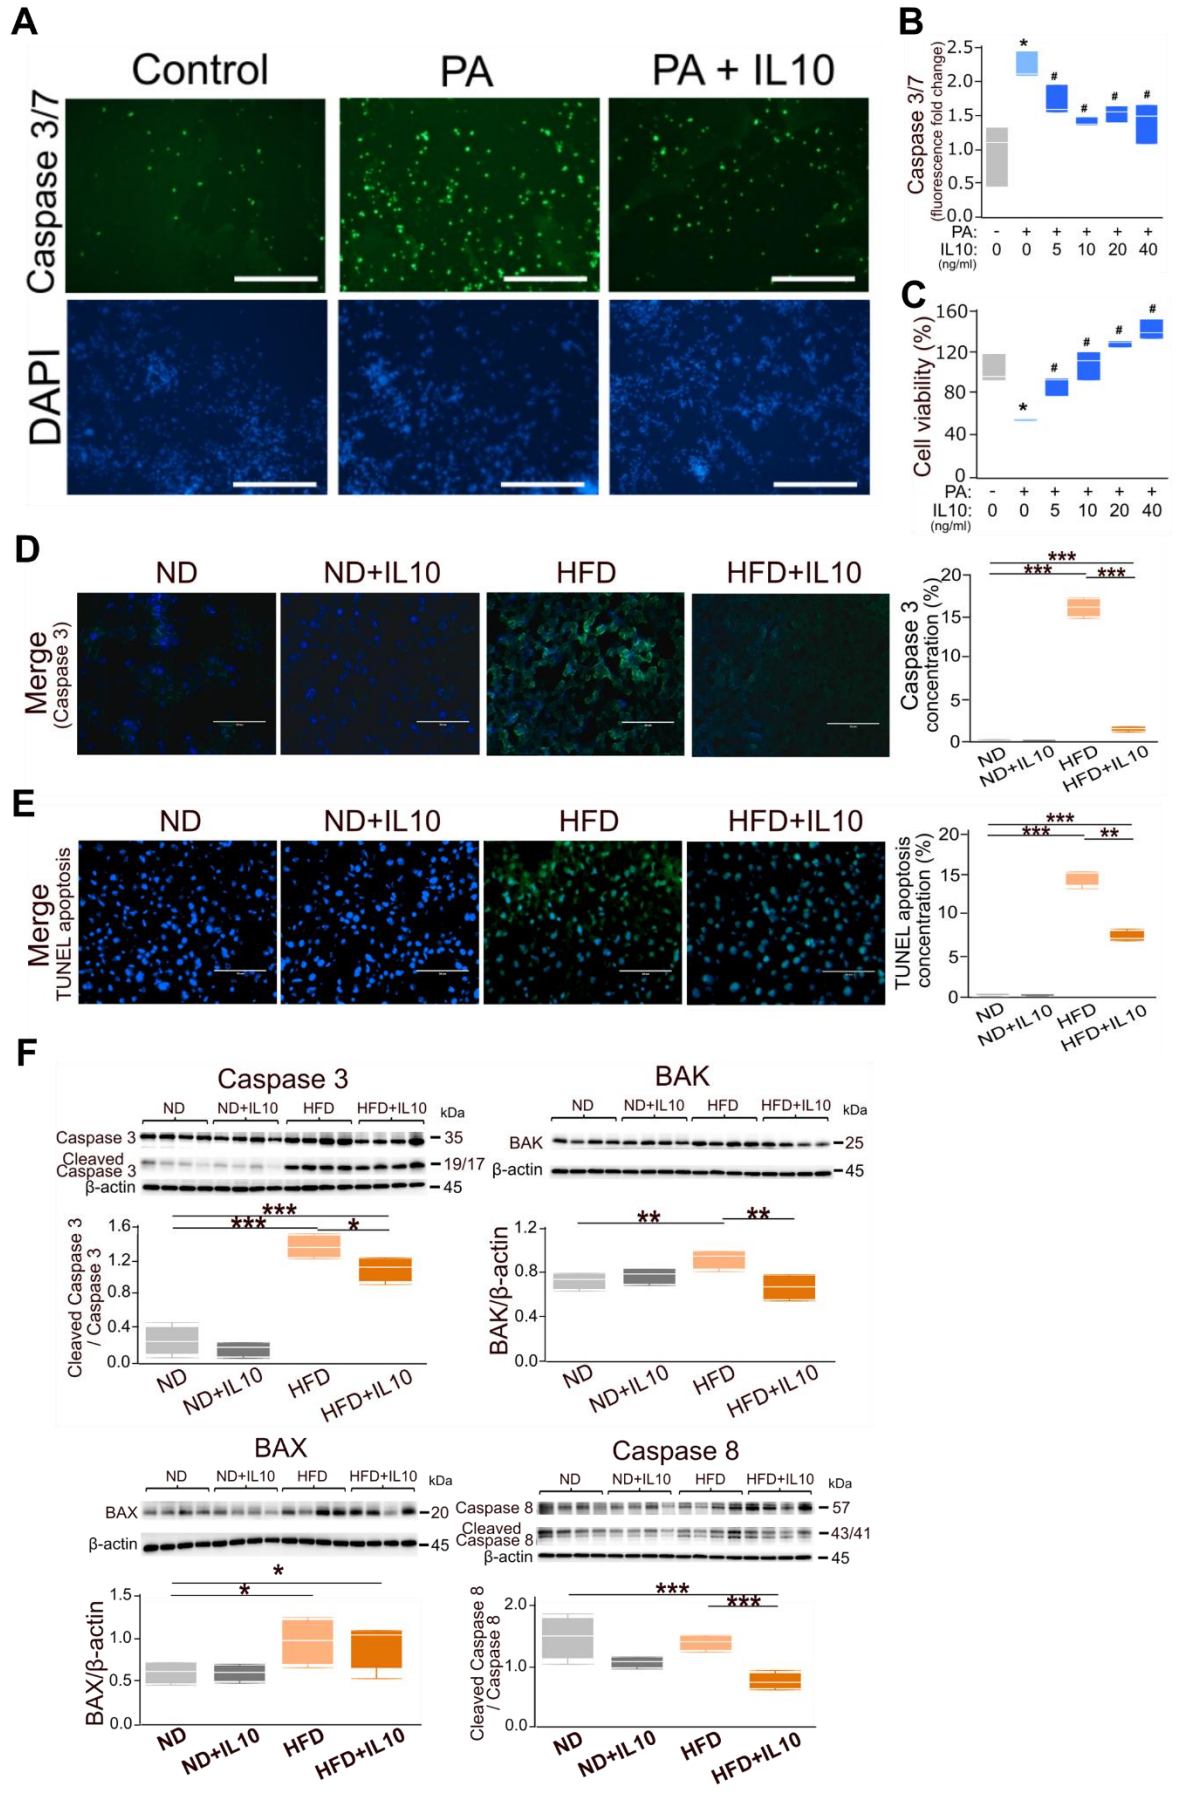

151 **Fig. S9. Short-term IL-10 treatment suppresses hepatic apoptosis in HepG2 cells (A–C)**  
152 **and HFD-fed mice (D–F).** (A) FMI of GFP channel (green, caspase-3/7) and DAPI channel  
153 (blue) in HepG2 cells. Immunocytochemistry and analysis are performed. The upper panel  
154 displays raw images acquired in the GFP channel, while the lower panel shows the  
155 corresponding DAPI channel. Scale bar = 1000  $\mu$ m. (B) Cellular caspase-3/7 activity is  
156 quantified using FMI, and relative fold changes compared to the control are examined. (C)  
157 Cell viability, representing energy metabolic activity, is quantified using absorption  
158 spectroscopy with XTT. Relative fold changes compared to the control (100%) are examined.  
159 Data are presented as box-and-whisker plots showing the median, interquartile range, and full  
160 data range. One-way ANOVA followed by Tukey's multiple-comparisons test;  $n = 3$ ,  
161  $*p < 0.05$  versus non-PA and IL-10 0 ng/mL (control);  $\#p < 0.05$  versus PA and IL-10 0 ng/mL.  
162 (D) FMI of the merged channel, a pseudo-colored overlay of GFP (green, cleaved caspase-3)  
163 and DAPI (blue) channels in liver tissues from four experimental groups.  
164 Immunohistochemistry is performed using an anti-GFP antibody for caspase-3 detection.  
165 Scale bar = 50  $\mu$ m. Hepatic caspase-3 activity is quantified using FMI, and the caspase-3-  
166 positive area (%) in each view is examined. The analysis is performed four times per group  
167 using different views. (E) FMI of the merged channel from the GFP (green, TUNEL) and  
168 DAPI (blue) channels, showing liver tissues from four experimental groups. Nuclear DNA  
169 fragmentation as a marker of late-stage apoptosis is shown with green fluorescence. Scale bar  
170 = 50  $\mu$ m. Quantitative evaluation of apoptosis is as described above. (F) Immunoblot analysis  
171 of BAK, BAX, and cleaved caspase-8/caspase-8 ratio.  $\beta$ -actin loading control for BAK was  
172 obtained from the same gel with cleaved caspase-8/caspase-8. Protein band intensities are  
173 normalized to  $\beta$ -actin and expressed as ratios. Data are presented as box-and-whisker plots  
174 showing the median, interquartile range, and full data range. One-way ANOVA followed by  
175 Tukey's multiple-comparisons test;  $n = 4$ ,  $*p < 0.05$ ,  $**p < 0.01$ ,  $***p < 0.001$ . BAK, Bcl-2  
176 antagonist or killer; BAX, Bcl-2-associated X protein; HFD, high-fat diet; ND, normal diet.  
177  
178

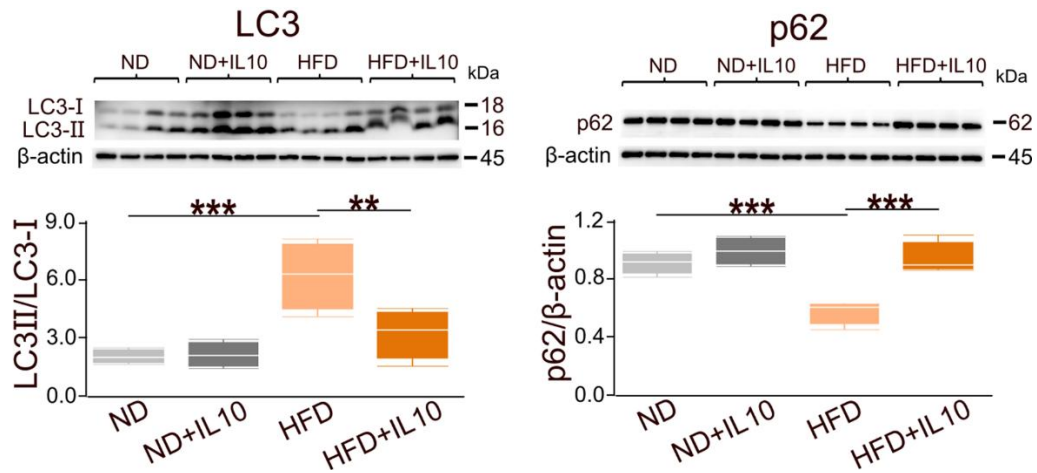

179

180 **Fig. S10. IL-10 modulates autophagy-related markers *in vivo*.** Immunoblot analysis of  
 181 LC3 (LC3-I/LC3-II) and p62 in liver tissues from ND, ND+IL-10, HFD, and HFD+IL-10  
 182 groups. LC3-II/I ratio and p62 protein levels are quantified (normalized to β-actin) and  
 183 expressed relative to ND controls. Data are presented as box-and-whisker plots showing the  
 184 median, interquartile range, and full data range. One-way ANOVA followed by Tukey's  
 185 multiple-comparisons test; n = 4, \*p<0.05, \*\*p<0.01, \*\*\*p<0.001. HFD, high-fat diet; ND,  
 186 normal diet.
